# Supplementary material for: Green finance, Green technology Innovation and Carbon Emission Reduction
Source: Research Square preprint supplement (doi:10.21203/rs.3.rs-8592930/v1), 2026-01-30
Supplement: Supplementary file 1 [file a7ce0793062d7cdff99b9dd7.xlsx]

## Sheet: Sheet2
Yeat	Prov-code	City-code	Dig	Yangtze River	GF	Carbon	construction carbon	GDP	PGDP	Urban residents' consumption	P	household consumption	Idu1	Idu2	Idu3
2021	310000	310000	0.0186834	1	#N/A	47.26	#N/A	13800.7	53606	0	2590	0	1981.3	4786.7	7032.8
2021	320000	320100	0.0121946	1	0.476584	44.66	695.646	13800.7	53606	0	2590	0	1981.3	4786.7	7032.8
2021	320000	320200	0.0120585	1	0.473714	43.54	841.003	13800.7	53606	0	2590	0	1981.3	4786.7	7032.8
2021	320000	320300	0.00635646	1	0.46822	47.31	849.017	13800.7	53606	0	2590	0	1981.3	4786.7	7032.8
2021	320000	320400	0.0109655	1	0.489212	51.28	691.345	13800.7	53606	0	2590	0	1981.3	4786.7	7032.8
2021	320000	320500	0.0149155	1	0.43132	50.8	833.523	13800.7	53606	0	2590	0	1981.3	4786.7	7032.8
2021	320000	320600	0.00822431	1	0.449032	49.78	756.23	13800.7	53606	0	2590	0	1981.3	4786.7	7032.8
2021	320000	320700	0.00664365	1	0.444358	44.61	660.661	13800.7	53606	0	2590	0	1981.3	4786.7	7032.8
2021	320000	320800	0.00607075	1	0.419102	37.89	790.588	13800.7	53606	0	2590	0	1981.3	4786.7	7032.8
2021	320000	320900	0.00616647	1	0.487818	35.81	870.478	13800.7	53606	0	2590	0	1981.3	4786.7	7032.8
2021	320000	321000	0.00791206	1	0.467482	24.01	694.117	13800.7	53606	0	2590	0	1981.3	4786.7	7032.8
2021	320000	321100	0.00898805	1	0.468876	22.82	802.623	13800.7	53606	0	2590	0	1981.3	4786.7	7032.8
2021	320000	321200	0.0072809	1	0.442718	21.58	625.043	13800.7	53606	0	2590	0	1981.3	4786.7	7032.8
2021	320000	321300	0.00606109	1	0.467728	18.81	691.575	13800.7	53606	0	2590	0	1981.3	4786.7	7032.8
2021	330000	330100	0.0147338	1	0.435092	17.08	699.196	16311.6	62991	0	2589	0	2359.1	6295.9	7656.6
2021	330000	330200	0.0122948	1	0.477158	7.42	734.094	16311.6	62991	0	2589	0	2359.1	6295.9	7656.6
2021	330000	330300	0.0102541	1	0.470926	1.85	762.201	16311.6	62991	0	2589	0	2359.1	6295.9	7656.6
2021	330000	330400	0.0109432	1	0.441406	0.99	643.104	16311.6	62991	0	2589	0	2359.1	6295.9	7656.6
2021	330000	330500	0.010385	1	0.48913	0.76	656.2	16311.6	62991	0	2589	0	2359.1	6295.9	7656.6
2021	330000	330600	0.0092616	1	0.490934	0.54	644.48	16311.6	62991	0	2589	0	2359.1	6295.9	7656.6
2021	330000	330700	0.0116946	1	0.410656	0.58	788.356	16311.6	62991	0	2589	0	2359.1	6295.9	7656.6
2021	330000	330800	0.00716889	1	0.468302	0.67	707.885	16311.6	62991	0	2589	0	2359.1	6295.9	7656.6
2021	330000	330900	0.010789	1	0.481832	4836.36	687.735	16311.6	62991	0	2589	0	2359.1	6295.9	7656.6
2021	330000	331000	0.00924533	1	0.42558	4186.1	574.611	16311.6	62991	0	2589	0	2359.1	6295.9	7656.6
2021	330000	331100	0.00699955	1	0.449442	4657.6	691.697	16311.6	62991	0	2589	0	2359.1	6295.9	7656.6
2021	340000	340100	0.00916275	1	0.324966	2733.88	420.078	13800.7	53606	0	2590	0	1981.3	4786.7	7032.8
2021	340000	340200	0.00708526	1	0.28372	2970.04	475.617	13800.7	53606	0	2590	0	1981.3	4786.7	7032.8
2021	340000	340300	0.00533948	1	0.264696	3138.96	431.535	13800.7	53606	0	2590	0	1981.3	4786.7	7032.8
2021	340000	340400	0.0052058	1	0.32431	2689.6	341.166	13800.7	53606	0	2590	0	1981.3	4786.7	7032.8
2021	340000	340500	0.00672267	1	0.25584	2565.78	424.861	13800.7	53606	0	2590	0	1981.3	4786.7	7032.8
2021	340000	340600	0.00543697	1	0.302252	2786.36	495.009	13800.7	53606	0	2590	0	1981.3	4786.7	7032.8
2021	340000	340700	0.00564105	1	0.290116	2578.08	495.915	13800.7	53606	0	2590	0	1981.3	4786.7	7032.8
2021	340000	340800	0.00510849	1	0.286836	2668.28	410.716	13800.7	53606	0	2590	0	1981.3	4786.7	7032.8
2021	340000	341000	0.00620491	1	0.263138	3273.44	541.6	13800.7	53606	0	2590	0	1981.3	4786.7	7032.8
2021	340000	341100	0.00546534	1	0.2952	2694.52	464.152	13800.7	53606	0	2590	0	1981.3	4786.7	7032.8
2021	340000	341200	0.00397951	1	0.26404	2715.84	488.82	13800.7	53606	0	2590	0	1981.3	4786.7	7032.8
2021	340000	341300	0.00434633	1	0.280276	3252.12	592.101	13800.7	53606	0	2590	0	1981.3	4786.7	7032.8
2021	340000	341500	0.00491259	1	0.27839	2710.1	530.57	13800.7	53606	0	2590	0	1981.3	4786.7	7032.8
2021	340000	341600	0.00421142	1	0.294298	2581.36	426.084	13800.7	53606	0	2590	0	1981.3	4786.7	7032.8
2021	340000	341700	0.00560481	1	0.30709	3010.22	565.421	13800.7	53606	0	2590	0	1981.3	4786.7	7032.8
2021	340000	341800	0.00608917	1	0.278226	2727.32	551.141	13800.7	53606	0	2590	0	1981.3	4786.7	7032.8
2021	360000	360100	0.00871519	1	0.300366	2569.06	358.879	13800.7	53606	0	2590	0	1981.3	4786.7	7032.8
2021	360000	360200	0.00503485	1	0.306106	2949.54	401.197	13800.7	53606	0	2590	0	1981.3	4786.7	7032.8
2021	360000	360300	0.00524695	1	0.280932	3210.3	488.874	13800.7	53606	0	2590	0	1981.3	4786.7	7032.8
2021	360000	360400	0.00433389	1	0.327754	2531.34	489.991	13800.7	53606	0	2590	0	1981.3	4786.7	7032.8
2021	360000	360500	0.0063628	1	0.30381	3214.4	506.213	13800.7	53606	0	2590	0	1981.3	4786.7	7032.8
2021	360000	360600	0.00557327	1	0.258382	2665	346.361	13800.7	53606	0	2590	0	1981.3	4786.7	7032.8
2021	360000	360700	0.00576382	1	0.314388	2925.76	413.942	13800.7	53606	0	2590	0	1981.3	4786.7	7032.8
2021	360000	360800	0.00496015	1	0.313568	2601.86	394.245	13800.7	53606	0	2590	0	1981.3	4786.7	7032.8
2021	360000	360900	0.00477501	1	0.267156	3279.18	606.465	13800.7	53606	0	2590	0	1981.3	4786.7	7032.8
2021	360000	361000	0.0047845	1	0.282572	2684.68	443.71	13800.7	53606	0	2590	0	1981.3	4786.7	7032.8
2021	360000	361100	0.00468731	1	0.246	2952	575.749	13800.7	53606	0	2590	0	1981.3	4786.7	7032.8
2021	420000	420100	0.0110123	1	0.435174	4303.36	846.193	13800.7	53606	0	2590	0	1981.3	4786.7	7032.8
2021	420000	420200	0.00587649	1	0.445178	4631.36	612.066	13800.7	53606	0	2590	0	1981.3	4786.7	7032.8
2021	420000	420300	0.00564767	1	0.487326	4543.62	604.79	13800.7	53606	0	2590	0	1981.3	4786.7	7032.8
2021	420000	420500	0.00655901	1	0.439684	4601.84	625.393	13800.7	53606	0	2590	0	1981.3	4786.7	7032.8
2021	420000	420600	0.00271661	1	0.416806	4730.58	648.895	13800.7	53606	0	2590	0	1981.3	4786.7	7032.8
2021	420000	420700	0.00647141	1	0.440422	4553.46	854.282	13800.7	53606	0	2590	0	1981.3	4786.7	7032.8
2021	420000	420800	0.00517506	1	0.435994	4254.98	795.639	13800.7	53606	0	2590	0	1981.3	4786.7	7032.8
2021	420000	420900	0.00490529	1	0.49036	4294.34	634.212	13800.7	53606	0	2590	0	1981.3	4786.7	7032.8
2021	420000	421000	0.00495727	1	0.449934	4291.06	768.176	13800.7	53606	0	2590	0	1981.3	4786.7	7032.8
2021	420000	421100	0.00447524	1	0.450262	4305.82	594.216	13800.7	53606	0	2590	0	1981.3	4786.7	7032.8
2021	420000	421200	0.00506832	1	0.422218	4102.46	754.007	13800.7	53606	0	2590	0	1981.3	4786.7	7032.8
2021	420000	421300	0.0046115	1	0.433288	4745.34	839.008	13800.7	53606	0	2590	0	1981.3	4786.7	7032.8
2021	430000	430100	0.0104378	1	0.491098	4728.12	778.241	13800.7	53606	0	2590	0	1981.3	4786.7	7032.8
2021	430000	430200	0.00644815	1	0.477322	4131.98	675.381	13800.7	53606	0	2590	0	1981.3	4786.7	7032.8
2021	430000	430300	0.00648559	1	0.417872	4144.28	689.988	13800.7	53606	0	2590	0	1981.3	4786.7	7032.8
2021	430000	430400	0.00432879	1	0.423776	4757.64	780.174	13800.7	53606	0	2590	0	1981.3	4786.7	7032.8
2021	430000	430500	0.00381951	1	0.417462	4920	802.819	13800.7	53606	0	2590	0	1981.3	4786.7	7032.8
2021	430000	430600	0.00529565	1	0.462808	4307.46	858.807	13800.7	53606	0	2590	0	1981.3	4786.7	7032.8
2021	430000	430700	0.00517733	1	0.469532	4455.06	833.622	13800.7	53606	0	2590	0	1981.3	4786.7	7032.8
2021	430000	430800	0.00522879	1	0.42558	4397.66	799.288	13800.7	53606	0	2590	0	1981.3	4786.7	7032.8
2021	430000	430900	0.00447655	1	0.441406	4624.8	643.194	13800.7	53606	0	2590	0	1981.3	4786.7	7032.8
2021	430000	431000	0.00482904	1	0.460758	4329.6	596.178	13800.7	53606	0	2590	0	1981.3	4786.7	7032.8
2021	430000	431100	0.0041035	1	0.458872	4679.74	677.44	13800.7	53606	0	2590	0	1981.3	4786.7	7032.8
2021	430000	431200	0.0245237	1	0.419102	4766.66	969.316	13800.7	53606	0	2590	0	1981.3	4786.7	7032.8
2021	430000	431300	0.00457203	1	0.46289	4564.12	592.949	13800.7	53606	0	2590	0	1981.3	4786.7	7032.8
2020	310000	310000	0.00444439	1	#N/A	44.66	#N/A	13597.1	53542	0	2559	0	1781.8	4784.4	7030.9
2020	320000	320100	0.00418454	1	0.41328	43.54	707.674	13597.1	53542	0	2559	0	1781.8	4784.4	7030.9
2020	320000	320200	0.00372209	1	0.45176	47.31	810.215	13597.1	53542	0	2559	0	1781.8	4784.4	7030.9
2020	320000	320300	0.00295424	1	0.4792	51.28	627.775	13597.1	53542	0	2559	0	1781.8	4784.4	7030.9
2020	320000	320400	0.00383104	1	0.4236	50.8	855.218	13597.1	53542	0	2559	0	1781.8	4784.4	7030.9
2020	320000	320500	0.00403003	1	0.4412	49.78	576.232	13597.1	53542	0	2559	0	1781.8	4784.4	7030.9
2020	320000	320600	0.00340117	1	0.47752	44.61	811.424	13597.1	53542	0	2559	0	1781.8	4784.4	7030.9
2020	320000	320700	0.00293602	1	0.47616	37.89	722.6	13597.1	53542	0	2559	0	1781.8	4784.4	7030.9
2020	320000	320800	0.00287757	1	0.43352	35.81	733.087	13597.1	53542	0	2559	0	1781.8	4784.4	7030.9
2020	320000	320900	0.00277438	1	0.43928	24.01	857.277	13597.1	53542	0	2559	0	1781.8	4784.4	7030.9
2020	320000	321000	0.00327823	1	0.40928	22.82	671.102	13597.1	53542	0	2559	0	1781.8	4784.4	7030.9
2020	320000	321100	0.00341436	1	0.4784	21.58	721.027	13597.1	53542	0	2559	0	1781.8	4784.4	7030.9
2020	320000	321200	0.00318327	1	0.43824	18.81	597.339	13597.1	53542	0	2559	0	1781.8	4784.4	7030.9
2020	320000	321300	0.00276404	1	0.47008	17.08	615.706	13597.1	53542	0	2559	0	1781.8	4784.4	7030.9
2020	330000	330100	0.00496056	1	0.44784	7.42	772.895	13800.7	53606	0	2590	0	1981.3	4786.7	7032.8
2020	330000	330200	0.00370329	1	0.41008	1.85	590.081	13800.7	53606	0	2590	0	1981.3	4786.7	7032.8
2020	330000	330300	0.00355559	1	0.42224	0.99	843.167	13800.7	53606	0	2590	0	1981.3	4786.7	7032.8
2020	330000	330400	0.00367883	1	0.442	0.76	517.976	13800.7	53606	0	2590	0	1981.3	4786.7	7032.8
2020	330000	330500	0.00349215	1	0.41352	0.54	716.027	13800.7	53606	0	2590	0	1981.3	4786.7	7032.8
2020	330000	330600	0.00340443	1	0.43096	0.58	682.356	13800.7	53606	0	2590	0	1981.3	4786.7	7032.8
2020	330000	330700	0.00393711	1	0.43312	0.67	663.453	13800.7	53606	0	2590	0	1981.3	4786.7	7032.8
2020	330000	330800	0.00321708	1	0.46704	4037.6	666.633	13800.7	53606	0	2590	0	1981.3	4786.7	7032.8
2020	330000	330900	0.00332661	1	0.43312	4634.4	722.527	13800.7	53606	0	2590	0	1981.3	4786.7	7032.8
2020	330000	331000	0.00329132	1	0.47784	4104	575.038	13800.7	53606	0	2590	0	1981.3	4786.7	7032.8
2020	330000	331100	0.00306781	1	0.42688	4413.6	744.278	13800.7	53606	0	2590	0	1981.3	4786.7	7032.8
2020	340000	340100	0.00362888	1	0.25576	2860.8	428.445	13597.1	53542	0	2559	0	1781.8	4784.4	7030.9
2020	340000	340200	0.00328528	1	0.25	3095.2	625.501	13597.1	53542	0	2559	0	1781.8	4784.4	7030.9
2020	340000	340300	0.00214751	1	0.29192	3078.4	434.155	13597.1	53542	0	2559	0	1781.8	4784.4	7030.9
2020	340000	340400	0.00198489	1	0.28096	2400.8	413.771	13597.1	53542	0	2559	0	1781.8	4784.4	7030.9
2020	340000	340500	0.00270796	1	0.30696	2901.6	474.32	13597.1	53542	0	2559	0	1781.8	4784.4	7030.9
2020	340000	340600	0.00192002	1	0.31344	2920	541.417	13597.1	53542	0	2559	0	1781.8	4784.4	7030.9
2020	340000	340700	0.00234059	1	0.26032	3139.2	468.108	13597.1	53542	0	2559	0	1781.8	4784.4	7030.9
2020	340000	340800	0.00206665	1	0.31928	2559.2	382.437	13597.1	53542	0	2559	0	1781.8	4784.4	7030.9
2020	340000	341000	0.00243598	1	0.2604	2647.2	374.071	13597.1	53542	0	2559	0	1781.8	4784.4	7030.9
2020	340000	341100	0.00233648	1	0.26288	2790.4	353.012	13597.1	53542	0	2559	0	1781.8	4784.4	7030.9
2020	340000	341200	0.0018022	1	0.29576	3196	474.623	13597.1	53542	0	2559	0	1781.8	4784.4	7030.9
2020	340000	341300	0.00149287	1	0.29232	2977.6	541.177	13597.1	53542	0	2559	0	1781.8	4784.4	7030.9
2020	340000	341500	0.00242584	1	0.29256	2652.8	443.394	13597.1	53542	0	2559	0	1781.8	4784.4	7030.9
2020	340000	341600	0.00165223	1	0.248	2665.6	458.727	13597.1	53542	0	2559	0	1781.8	4784.4	7030.9
2020	340000	341700	0.00208795	1	0.31472	2874.4	474.637	13597.1	53542	0	2559	0	1781.8	4784.4	7030.9
2020	340000	341800	0.00228428	1	0.26216	2476.8	440.635	13597.1	53542	0	2559	0	1781.8	4784.4	7030.9
2020	360000	360100	0.00332085	1	0.3056	2911.2	539.636	13597.1	53542	0	2559	0	1781.8	4784.4	7030.9
2020	360000	360200	0.00233892	1	0.2852	2685.6	380.086	13597.1	53542	0	2559	0	1781.8	4784.4	7030.9
2020	360000	360300	0.00176773	1	0.28896	2779.2	430.857	13597.1	53542	0	2559	0	1781.8	4784.4	7030.9
2020	360000	360400	0.00221927	1	0.30968	2573.6	431.149	13597.1	53542	0	2559	0	1781.8	4784.4	7030.9
2020	360000	360500	0.00203824	1	0.2912	2456	375.39	13597.1	53542	0	2559	0	1781.8	4784.4	7030.9
2020	360000	360600	0.0020108	1	0.26256	2960	534.114	13597.1	53542	0	2559	0	1781.8	4784.4	7030.9
2020	360000	360700	0.00228515	1	0.25848	3176.8	539.37	13597.1	53542	0	2559	0	1781.8	4784.4	7030.9
2020	360000	360800	0.0016793	1	0.27	2569.6	445.566	13597.1	53542	0	2559	0	1781.8	4784.4	7030.9
2020	360000	360900	0.00178016	1	0.31608	2505.6	457.22	13597.1	53542	0	2559	0	1781.8	4784.4	7030.9
2020	360000	361000	0.0018472	1	0.28424	3031.2	455.157	13597.1	53542	0	2559	0	1781.8	4784.4	7030.9
2020	360000	361100	0.00184693	1	0.29984	2937.6	553.634	13597.1	53542	0	2559	0	1781.8	4784.4	7030.9
2020	420000	420100	0.00381116	1	0.4428	4265.6	849.072	13597.1	53542	0	2559	0	1781.8	4784.4	7030.9
2020	420000	420200	0.00235475	1	0.43616	4672.8	658.303	13597.1	53542	0	2559	0	1781.8	4784.4	7030.9
2020	420000	420300	0.00211711	1	0.45144	4220.8	603.141	13597.1	53542	0	2559	0	1781.8	4784.4	7030.9
2020	420000	420500	0.00236687	1	0.47272	4080	581.026	13597.1	53542	0	2559	0	1781.8	4784.4	7030.9
2020	420000	420600	0.00221234	1	0.45	4454.4	669.386	13597.1	53542	0	2559	0	1781.8	4784.4	7030.9
2020	420000	420700	0.00259336	1	0.43232	4426.4	761.412	13597.1	53542	0	2559	0	1781.8	4784.4	7030.9
2020	420000	420800	0.00189243	1	0.4488	4659.2	895.016	13597.1	53542	0	2559	0	1781.8	4784.4	7030.9
2020	420000	420900	0.00196099	1	0.42168	4728	831.091	13597.1	53542	0	2559	0	1781.8	4784.4	7030.9
2020	420000	421000	0.00202071	1	0.40448	4132.8	780.503	13597.1	53542	0	2559	0	1781.8	4784.4	7030.9
2020	420000	421100	0.00189055	1	0.47424	4273.6	594.734	13597.1	53542	0	2559	0	1781.8	4784.4	7030.9
2020	420000	421200	0.00209172	1	0.45848	4392.8	819.238	13597.1	53542	0	2559	0	1781.8	4784.4	7030.9
2020	420000	421300	0.00182986	1	0.47432	4060.8	716.621	13597.1	53542	0	2559	0	1781.8	4784.4	7030.9
2020	430000	430100	0.00349528	1	0.40408	4472	620.571	13597.1	53542	0	2559	0	1781.8	4784.4	7030.9
2020	430000	430200	0.00217711	1	0.4744	4588	694.045	13597.1	53542	0	2559	0	1781.8	4784.4	7030.9
2020	430000	430300	0.00207291	1	0.43192	4526.4	757.419	13597.1	53542	0	2559	0	1781.8	4784.4	7030.9
2020	430000	430400	0.00160624	1	0.41152	4105.6	740.182	13597.1	53542	0	2559	0	1781.8	4784.4	7030.9
2020	430000	430500	0.0011252	1	0.4212	4262.4	639.52	13597.1	53542	0	2559	0	1781.8	4784.4	7030.9
2020	430000	430600	0.00168607	1	0.45688	4404	740.957	13597.1	53542	0	2559	0	1781.8	4784.4	7030.9
2020	430000	430700	0.00162772	1	0.42512	4616	768.517	13597.1	53542	0	2559	0	1781.8	4784.4	7030.9
2020	430000	430800	0.00153101	1	0.46696	4545.6	659.817	13597.1	53542	0	2559	0	1781.8	4784.4	7030.9
2020	430000	430900	0.00130211	1	0.4272	4476	680.604	13597.1	53542	0	2559	0	1781.8	4784.4	7030.9
2020	430000	431000	0.0015034	1	0.4044	4710.4	684.725	13597.1	53542	0	2559	0	1781.8	4784.4	7030.9
2020	430000	431100	0.0013924	1	0.46904	4370.4	776.256	13597.1	53542	0	2559	0	1781.8	4784.4	7030.9
2020	430000	431200	0.00140459	1	0.428	4238.4	856.554	13597.1	53542	0	2559	0	1781.8	4784.4	7030.9
2020	430000	431300	0.00141404	1	0.41544	4114.4	691.358	13597.1	53542	0	2559	0	1781.8	4784.4	7030.9
2019	310000	310000	0.396336	1	#N/A		#N/A	12809.4	51238	0	2520	0	1692.1	4657.2	6460.1
2019	320000	320100	0.33565	1	0.42198	4282.98	771.297	12809.4	51238	0	2520	0	1692.1	4657.2	6460.1
2019	320000	320200	0.185314	1	0.422838	3990.48	738.159	12809.4	51238	0	2520	0	1692.1	4657.2	6460.1
2019	320000	320300	0.0758661	1	0.4173	4223.7	618.15	12809.4	51238	0	2520	0	1692.1	4657.2	6460.1
2019	320000	320400	0.144182	1	0.452166	4169.88	621.28	12809.4	51238	0	2520	0	1692.1	4657.2	6460.1
2019	320000	320500	0.226342	1	0.43719	4211.22	579.655	12809.4	51238	0	2520	0	1692.1	4657.2	6460.1
2019	320000	320600	0.0990992	1	0.45318	4538.04	801.975	12809.4	51238	0	2520	0	1692.1	4657.2	6460.1
2019	320000	320700	0.0745707	1	0.444678	4481.1	771.556	12809.4	51238	0	2520	0	1692.1	4657.2	6460.1
2019	320000	320800	0.076035	1	0.403026	4626.18	862.539	12809.4	51238	0	2520	0	1692.1	4657.2	6460.1
2019	320000	320900	0.0781432	1	0.400842	4201.08	666.506	12809.4	51238	0	2520	0	1692.1	4657.2	6460.1
2019	320000	321000	0.104463	1	0.403494	3936.66	661.676	12809.4	51238	0	2520	0	1692.1	4657.2	6460.1
2019	320000	321100	0.114163	1	0.453804	4265.82	772.753	12809.4	51238	0	2520	0	1692.1	4657.2	6460.1
2019	320000	321200	0.0922677	1	0.415818	4040.4	671.884	12809.4	51238	0	2520	0	1692.1	4657.2	6460.1
2019	320000	321300	0.0703048	1	0.46488	4265.04	830.655	12809.4	51238	0	2520	0	1692.1	4657.2	6460.1
2019	330000	330100	0.334143	1	0.454272	4108.26	766.925	13597.1	53542	0	2559	0	1781.8	4784.4	7030.9
2019	330000	330200	0.153061	1	0.44382	4013.88	758.503	13597.1	53542	0	2559	0	1781.8	4784.4	7030.9
2019	330000	330300	0.111426	1	0.397488	3946.02	786.569	13597.1	53542	0	2559	0	1781.8	4784.4	7030.9
2019	330000	330400	0.129605	1	0.437346	4138.68	591.134	13597.1	53542	0	2559	0	1781.8	4784.4	7030.9
2019	330000	330500	0.136463	1	0.394212	4630.08	810.441	13597.1	53542	0	2559	0	1781.8	4784.4	7030.9
2019	330000	330600	0.105839	1	0.44109	4208.1	741.861	13597.1	53542	0	2559	0	1781.8	4784.4	7030.9
2019	330000	330700	0.132922	1	0.395304	4414.02	764.954	13597.1	53542	0	2559	0	1781.8	4784.4	7030.9
2019	330000	330800	0.0899543	1	0.45201	4091.88	637.182	13597.1	53542	0	2559	0	1781.8	4784.4	7030.9
2019	330000	330900	0.130684	1	0.422916	4482.66	750.555	13597.1	53542	0	2559	0	1781.8	4784.4	7030.9
2019	330000	331000	0.101206	1	0.413946	3928.08	558.011	13597.1	53542	0	2559	0	1781.8	4784.4	7030.9
2019	330000	331100	0.0840279	1	0.399048	4004.52	715.864	13597.1	53542	0	2559	0	1781.8	4784.4	7030.9
2019	340000	340100	0.14932	1	0.300768	2715.18	474.576	12809.4	51238	0	2520	0	1692.1	4657.2	6460.1
2019	340000	340200	0.0858112	1	0.289224	2546.7	345.964	12809.4	51238	0	2520	0	1692.1	4657.2	6460.1
2019	340000	340300	0.0582162	1	0.300612	2752.62	509.688	12809.4	51238	0	2520	0	1692.1	4657.2	6460.1
2019	340000	340400	0.0521631	1	0.292344	2446.86	403.809	12809.4	51238	0	2520	0	1692.1	4657.2	6460.1
2019	340000	340500	0.08393	1	0.287352	2436.72	426.536	12809.4	51238	0	2520	0	1692.1	4657.2	6460.1
2019	340000	340600	0.0633932	1	0.300378	2428.14	407.338	12809.4	51238	0	2520	0	1692.1	4657.2	6460.1
2019	340000	340700	0.0624662	1	0.240708	2982.72	438.094	12809.4	51238	0	2520	0	1692.1	4657.2	6460.1
2019	340000	340800	0.0553859	1	0.290316	2459.34	368.043	12809.4	51238	0	2520	0	1692.1	4657.2	6460.1
2019	340000	341000	0.0761815	1	0.285714	2370.42	354.358	12809.4	51238	0	2520	0	1692.1	4657.2	6460.1
2019	340000	341100	0.0590328	1	0.283608	2691.78	456.572	12809.4	51238	0	2520	0	1692.1	4657.2	6460.1
2019	340000	341200	0.0432261	1	0.260988	2844.66	390.311	12809.4	51238	0	2520	0	1692.1	4657.2	6460.1
2019	340000	341300	0.0455196	1	0.26286	2953.08	542.181	12809.4	51238	0	2520	0	1692.1	4657.2	6460.1
2019	340000	341500	0.0632241	1	0.26598	2820.48	404.877	12809.4	51238	0	2520	0	1692.1	4657.2	6460.1
2019	340000	341600	0.0411837	1	0.246012	2733.12	384.306	12809.4	51238	0	2520	0	1692.1	4657.2	6460.1
2019	340000	341700	0.064216	1	0.240786	2589.6	367.616	12809.4	51238	0	2520	0	1692.1	4657.2	6460.1
2019	340000	341800	0.0682012	1	0.284934	2758.86	430.564	12809.4	51238	0	2520	0	1692.1	4657.2	6460.1
2019	360000	360100	0.135327	1	0.285168	3071.64	510.641	12809.4	51238	0	2520	0	1692.1	4657.2	6460.1
2019	360000	360200	0.0619907	1	0.304278	2972.58	444.198	12809.4	51238	0	2520	0	1692.1	4657.2	6460.1
2019	360000	360300	0.0600867	1	0.307086	2469.48	329.219	12809.4	51238	0	2520	0	1692.1	4657.2	6460.1
2019	360000	360400	0.0611103	1	0.245154	2742.48	444.207	12809.4	51238	0	2520	0	1692.1	4657.2	6460.1
2019	360000	360500	0.161737	1	0.238602	3085.68	490.28	12809.4	51238	0	2520	0	1692.1	4657.2	6460.1
2019	360000	360600	0.0618936	1	0.311844	2632.5	350.279	12809.4	51238	0	2520	0	1692.1	4657.2	6460.1
2019	360000	360700	0.0577002	1	0.299676	2653.56	398.986	12809.4	51238	0	2520	0	1692.1	4657.2	6460.1
2019	360000	360800	0.0477486	1	0.286962	2790.06	434.14	12809.4	51238	0	2520	0	1692.1	4657.2	6460.1
2019	360000	360900	0.048896	1	0.2613	2704.26	445.792	12809.4	51238	0	2520	0	1692.1	4657.2	6460.1
2019	360000	361000	0.0471317	1	0.248196	2581.02	373.074	12809.4	51238	0	2520	0	1692.1	4657.2	6460.1
2019	360000	361100	0.0473408	1	0.28704	3105.18	451.691	12809.4	51238	0	2520	0	1692.1	4657.2	6460.1
2019	420000	420100	0.204935	1	0.461916	4650.36	639.69	12809.4	51238	0	2520	0	1692.1	4657.2	6460.1
2019	420000	420200	0.0872339	1	0.451542	4597.32	698.171	12809.4	51238	0	2520	0	1692.1	4657.2	6460.1
2019	420000	420300	0.0847385	1	0.454116	4467.06	690.491	12809.4	51238	0	2520	0	1692.1	4657.2	6460.1
2019	420000	420500	0.0832487	1	0.418002	4205.76	834.707	12809.4	51238	0	2520	0	1692.1	4657.2	6460.1
2019	420000	420600	0.0761074	1	0.430716	4676.88	836.869	12809.4	51238	0	2520	0	1692.1	4657.2	6460.1
2019	420000	420700	0.0825346	1	0.451776	4588.74	840.175	12809.4	51238	0	2520	0	1692.1	4657.2	6460.1
2019	420000	420800	0.0715759	1	0.467142	3964.74	542.89	12809.4	51238	0	2520	0	1692.1	4657.2	6460.1
2019	420000	420900	0.0581922	1	0.462462	4248.66	839.643	12809.4	51238	0	2520	0	1692.1	4657.2	6460.1
2019	420000	421000	0.0571814	1	0.461136	4336.8	602.383	12809.4	51238	0	2520	0	1692.1	4657.2	6460.1
2019	420000	421100	0.0539852	1	0.39429	4036.5	761.622	12809.4	51238	0	2520	0	1692.1	4657.2	6460.1
2019	420000	421200	0.0679875	1	0.430872	4266.6	730.881	12809.4	51238	0	2520	0	1692.1	4657.2	6460.1
2019	420000	421300	0.0519237	1	0.432666	3986.58	769.757	12809.4	51238	0	2520	0	1692.1	4657.2	6460.1
2019	430000	430100	0.142425	1	0.433914	4007.64	658.963	12809.4	51238	0	2520	0	1692.1	4657.2	6460.1
2019	430000	430200	0.0721824	1	0.428376	3956.16	613.673	12809.4	51238	0	2520	0	1692.1	4657.2	6460.1
2019	430000	430300	0.0686617	1	0.462306	4542.72	739.964	12809.4	51238	0	2520	0	1692.1	4657.2	6460.1
2019	430000	430400	0.0529585	1	0.458406	4451.46	785.363	12809.4	51238	0	2520	0	1692.1	4657.2	6460.1
2019	430000	430500	0.0359679	1	0.454428	3923.4	563.708	12809.4	51238	0	2520	0	1692.1	4657.2	6460.1
2019	430000	430600	0.0584517	1	0.439296	4665.96	768.516	12809.4	51238	0	2520	0	1692.1	4657.2	6460.1
2019	430000	430700	0.0542874	1	0.435552	4410.9	851.407	12809.4	51238	0	2520	0	1692.1	4657.2	6460.1
2019	430000	430800	0.0624513	1	0.402168	3966.3	515.848	12809.4	51238	0	2520	0	1692.1	4657.2	6460.1
2019	430000	430900	0.0463431	1	0.40053	4563	670.65	12809.4	51238	0	2520	0	1692.1	4657.2	6460.1
2019	430000	431000	0.0512	1	0.43719	3983.46	736.667	12809.4	51238	0	2520	0	1692.1	4657.2	6460.1
2019	430000	431100	0.0401779	1	0.422526	4435.86	756.877	12809.4	51238	0	2520	0	1692.1	4657.2	6460.1
2019	430000	431200	0.0484865	1	0.409656	4481.88	876.875	12809.4	51238	0	2520	0	1692.1	4657.2	6460.1
2019	430000	431300	0.0485599	1	0.40131	4419.48	685.156	12809.4	51238	0	2520	0	1692.1	4657.2	6460.1
2018	310000	310000	0.385162	1	#N/A		#N/A	11159.9	45476	2867.2	2480	4052.4	1551.8	4096.2	5511.9
2018	320000	320100	0.368329	1	0.432896	4504.52	685.726	11159.9	45476	2867.2	2480	4052.4	1551.8	4096.2	5511.9
2018	320000	320200	0.179382	1	0.4446	4257.52	752.74	11159.9	45476	2867.2	2480	4052.4	1551.8	4096.2	5511.9
2018	320000	320300	0.0638771	1	0.428412	4389	621.651	11159.9	45476	2867.2	2480	4052.4	1551.8	4096.2	5511.9
2018	320000	320400	0.137023	1	0.453644	4030.28	559.538	11159.9	45476	2867.2	2480	4052.4	1551.8	4096.2	5511.9
2018	320000	320500	0.218957	1	0.437152	4053.84	691.818	11159.9	45476	2867.2	2480	4052.4	1551.8	4096.2	5511.9
2018	320000	320600	0.0837045	1	0.413744	4231.68	837.359	11159.9	45476	2867.2	2480	4052.4	1551.8	4096.2	5511.9
2018	320000	320700	0.0634088	1	0.38494	3857	521.174	11159.9	45476	2867.2	2480	4052.4	1551.8	4096.2	5511.9
2018	320000	320800	0.0643475	1	0.405156	4386.72	849.738	11159.9	45476	2867.2	2480	4052.4	1551.8	4096.2	5511.9
2018	320000	320900	0.0670969	1	0.415644	4184.56	708.261	11159.9	45476	2867.2	2480	4052.4	1551.8	4096.2	5511.9
2018	320000	321000	0.0954483	1	0.41648	3963.4	613.263	11159.9	45476	2867.2	2480	4052.4	1551.8	4096.2	5511.9
2018	320000	321100	0.102196	1	0.3876	4318.32	657.084	11159.9	45476	2867.2	2480	4052.4	1551.8	4096.2	5511.9
2018	320000	321200	0.0797374	1	0.433276	3928.44	791.542	11159.9	45476	2867.2	2480	4052.4	1551.8	4096.2	5511.9
2018	320000	321300	0.0584051	1	0.430768	4151.88	724.255	11159.9	45476	2867.2	2480	4052.4	1551.8	4096.2	5511.9
2018	330000	330100	0.330607	1	0.410628	4156.44	860.172	12809.4	51238	0	2520	0	1692.1	4657.2	6460.1
2018	330000	330200	0.151341	1	0.42332	4385.96	692.714	12809.4	51238	0	2520	0	1692.1	4657.2	6460.1
2018	330000	330300	0.106	1	0.444524	3848.64	757.822	12809.4	51238	0	2520	0	1692.1	4657.2	6460.1
2018	330000	330400	0.124749	1	0.434416	3958.84	608.821	12809.4	51238	0	2520	0	1692.1	4657.2	6460.1
2018	330000	330500	0.132396	1	0.410856	3969.48	783.09	12809.4	51238	0	2520	0	1692.1	4657.2	6460.1
2018	330000	330600	0.103379	1	0.427044	4560	721.695	12809.4	51238	0	2520	0	1692.1	4657.2	6460.1
2018	330000	330700	0.137942	1	0.423472	4264.36	643.845	12809.4	51238	0	2520	0	1692.1	4657.2	6460.1
2018	330000	330800	0.0756095	1	0.387296	3983.92	673.26	12809.4	51238	0	2520	0	1692.1	4657.2	6460.1
2018	330000	330900	0.128015	1	0.4256	4189.12	810.455	12809.4	51238	0	2520	0	1692.1	4657.2	6460.1
2018	330000	331000	0.0941914	1	0.450452	4039.4	660.554	12809.4	51238	0	2520	0	1692.1	4657.2	6460.1
2018	330000	331100	0.0741696	1	0.455696	4147.32	645.985	12809.4	51238	0	2520	0	1692.1	4657.2	6460.1
2018	340000	340100	0.144318	1	0.259312	2793	400.982	11159.9	45476	2867.2	2480	4052.4	1551.8	4096.2	5511.9
2018	340000	340200	0.0764721	1	0.23864	2428.96	358.889	11159.9	45476	2867.2	2480	4052.4	1551.8	4096.2	5511.9
2018	340000	340300	0.0536624	1	0.303924	2751.2	381.501	11159.9	45476	2867.2	2480	4052.4	1551.8	4096.2	5511.9
2018	340000	340400	0.0488566	1	0.283784	2716.24	497.685	11159.9	45476	2867.2	2480	4052.4	1551.8	4096.2	5511.9
2018	340000	340500	0.0782344	1	0.261288	3020.24	371.349	11159.9	45476	2867.2	2480	4052.4	1551.8	4096.2	5511.9
2018	340000	340600	0.0609308	1	0.258476	2593.88	380.086	11159.9	45476	2867.2	2480	4052.4	1551.8	4096.2	5511.9
2018	340000	340700	0.0558159	1	0.24206	2345.36	334.831	11159.9	45476	2867.2	2480	4052.4	1551.8	4096.2	5511.9
2018	340000	340800	0.0543187	1	0.263264	2536.12	508.811	11159.9	45476	2867.2	2480	4052.4	1551.8	4096.2	5511.9
2018	340000	341000	0.0702804	1	0.259312	2805.16	471.317	11159.9	45476	2867.2	2480	4052.4	1551.8	4096.2	5511.9
2018	340000	341100	0.092206	1	0.246088	2977.68	514.447	11159.9	45476	2867.2	2480	4052.4	1551.8	4096.2	5511.9
2018	340000	341200	0.0392456	1	0.30134	2697.24	461.837	11159.9	45476	2867.2	2480	4052.4	1551.8	4096.2	5511.9
2018	340000	341300	0.0460683	1	0.297616	2992.12	447.153	11159.9	45476	2867.2	2480	4052.4	1551.8	4096.2	5511.9
2018	340000	341500	0.0628005	1	0.27284	2751.96	441.504	11159.9	45476	2867.2	2480	4052.4	1551.8	4096.2	5511.9
2018	340000	341600	0.0405709	1	0.285836	2732.96	456.781	11159.9	45476	2867.2	2480	4052.4	1551.8	4096.2	5511.9
2018	340000	341700	0.0600857	1	0.266304	2673.68	362.034	11159.9	45476	2867.2	2480	4052.4	1551.8	4096.2	5511.9
2018	340000	341800	0.0649816	1	0.244492	2939.68	481.976	11159.9	45476	2867.2	2480	4052.4	1551.8	4096.2	5511.9
2018	360000	360100	0.131556	1	0.238792	2534.6	386.667	11159.9	45476	2867.2	2480	4052.4	1551.8	4096.2	5511.9
2018	360000	360200	0.0460294	1	0.242516	3007.32	473.57	11159.9	45476	2867.2	2480	4052.4	1551.8	4096.2	5511.9
2018	360000	360300	0.0619233	1	0.266456	2996.68	531.039	11159.9	45476	2867.2	2480	4052.4	1551.8	4096.2	5511.9
2018	360000	360400	0.0566274	1	0.2679	2591.6	495.859	11159.9	45476	2867.2	2480	4052.4	1551.8	4096.2	5511.9
2018	360000	360500	0.123383	1	0.27664	2441.12	433.707	11159.9	45476	2867.2	2480	4052.4	1551.8	4096.2	5511.9
2018	360000	360600	0.0598134	1	0.241528	2914.6	530.385	11159.9	45476	2867.2	2480	4052.4	1551.8	4096.2	5511.9
2018	360000	360700	0.0532118	1	0.29336	2378.8	361.884	11159.9	45476	2867.2	2480	4052.4	1551.8	4096.2	5511.9
2018	360000	360800	0.045663	1	0.294576	2764.12	537.392	11159.9	45476	2867.2	2480	4052.4	1551.8	4096.2	5511.9
2018	360000	360900	0.0498534	1	0.25118	2485.2	418.015	11159.9	45476	2867.2	2480	4052.4	1551.8	4096.2	5511.9
2018	360000	361000	0.0453517	1	0.243656	2362.84	427.565	11159.9	45476	2867.2	2480	4052.4	1551.8	4096.2	5511.9
2018	360000	361100	0.0453707	1	0.243504	2486.72	469.814	11159.9	45476	2867.2	2480	4052.4	1551.8	4096.2	5511.9
2018	420000	420100	0.211076	1	0.45068	3984.68	745.158	11159.9	45476	2867.2	2480	4052.4	1551.8	4096.2	5511.9
2018	420000	420200	0.0717258	1	0.397024	4318.32	664.552	11159.9	45476	2867.2	2480	4052.4	1551.8	4096.2	5511.9
2018	420000	420300	0.0780832	1	0.392008	4242.32	701.99	11159.9	45476	2867.2	2480	4052.4	1551.8	4096.2	5511.9
2018	420000	420500	0.0807311	1	0.41344	4085	684.345	11159.9	45476	2867.2	2480	4052.4	1551.8	4096.2	5511.9
2018	420000	420600	0.0700151	1	0.397784	4486.28	678.515	11159.9	45476	2867.2	2480	4052.4	1551.8	4096.2	5511.9
2018	420000	420700	0.0754188	1	0.383876	4286.4	741.201	11159.9	45476	2867.2	2480	4052.4	1551.8	4096.2	5511.9
2018	420000	420800	0.0730324	1	0.404472	3955.04	589.628	11159.9	45476	2867.2	2480	4052.4	1551.8	4096.2	5511.9
2018	420000	420900	0.0513397	1	0.419748	4266.64	629.531	11159.9	45476	2867.2	2480	4052.4	1551.8	4096.2	5511.9
2018	420000	421000	0.0514703	1	0.388132	4164.8	650.306	11159.9	45476	2867.2	2480	4052.4	1551.8	4096.2	5511.9
2018	420000	421100	0.0448621	1	0.416176	4466.52	701.994	11159.9	45476	2867.2	2480	4052.4	1551.8	4096.2	5511.9
2018	420000	421200	0.0666933	1	0.416176	4214.2	613.666	11159.9	45476	2867.2	2480	4052.4	1551.8	4096.2	5511.9
2018	420000	421300	0.0471538	1	0.419292	4247.64	777.999	11159.9	45476	2867.2	2480	4052.4	1551.8	4096.2	5511.9
2018	430000	430100	0.127258	1	0.430464	4431.56	804.143	11159.9	45476	2867.2	2480	4052.4	1551.8	4096.2	5511.9
2018	430000	430200	0.0678141	1	0.3971	4461.96	684.798	11159.9	45476	2867.2	2480	4052.4	1551.8	4096.2	5511.9
2018	430000	430300	0.0655721	1	0.413288	4306.92	740.419	11159.9	45476	2867.2	2480	4052.4	1551.8	4096.2	5511.9
2018	430000	430400	0.0540256	1	0.394972	4090.32	637.636	11159.9	45476	2867.2	2480	4052.4	1551.8	4096.2	5511.9
2018	430000	430500	0.0367388	1	0.45144	4389.76	642.457	11159.9	45476	2867.2	2480	4052.4	1551.8	4096.2	5511.9
2018	430000	430600	0.0561644	1	0.432212	3953.52	742.399	11159.9	45476	2867.2	2480	4052.4	1551.8	4096.2	5511.9
2018	430000	430700	0.0539809	1	0.429476	4130.6	581.013	11159.9	45476	2867.2	2480	4052.4	1551.8	4096.2	5511.9
2018	430000	430800	0.0622713	1	0.389804	4523.52	806.914	11159.9	45476	2867.2	2480	4052.4	1551.8	4096.2	5511.9
2018	430000	430900	0.0467591	1	0.425448	3816.72	511.788	11159.9	45476	2867.2	2480	4052.4	1551.8	4096.2	5511.9
2018	430000	431000	0.0532176	1	0.437912	4299.32	611.114	11159.9	45476	2867.2	2480	4052.4	1551.8	4096.2	5511.9
2018	430000	431100	0.040905	1	0.410856	4123.76	660.627	11159.9	45476	2867.2	2480	4052.4	1551.8	4096.2	5511.9
2018	430000	431200	0.0488249	1	0.395808	3945.16	820.359	11159.9	45476	2867.2	2480	4052.4	1551.8	4096.2	5511.9
2018	430000	431300	0.0464927	1	0.44384	4279.56	736.995	11159.9	45476	2867.2	2480	4052.4	1551.8	4096.2	5511.9
2017	310000	310000	0.408506	1	#N/A		#N/A	9630.8	40020	2532.4	2428	3627.2	1473.2	3446.1	4711.6
2017	320000	320100	0.372647	1	0.393384	3856.14	542.293	9630.8	40020	2532.4	2428	3627.2	1473.2	3446.1	4711.6
2017	320000	320200	0.211062	1	0.414474	3834.68	677.389	9630.8	40020	2532.4	2428	3627.2	1473.2	3446.1	4711.6
2017	320000	320300	0.0763665	1	0.370962	3708.14	525.977	9630.8	40020	2532.4	2428	3627.2	1473.2	3446.1	4711.6
2017	320000	320400	0.161696	1	0.381766	3849.48	628.798	9630.8	40020	2532.4	2428	3627.2	1473.2	3446.1	4711.6
2017	320000	320500	0.272289	1	0.395826	4138.82	731.076	9630.8	40020	2532.4	2428	3627.2	1473.2	3446.1	4711.6
2017	320000	320600	0.105438	1	0.433196	4215.78	846.98	9630.8	40020	2532.4	2428	3627.2	1473.2	3446.1	4711.6
2017	320000	320700	0.0808527	1	0.4255	4406.7	773.678	9630.8	40020	2532.4	2428	3627.2	1473.2	3446.1	4711.6
2017	320000	320800	0.078304	1	0.37777	3734.04	729.316	9630.8	40020	2532.4	2428	3627.2	1473.2	3446.1	4711.6
2017	320000	320900	0.0801228	1	0.401598	3881.3	670.219	9630.8	40020	2532.4	2428	3627.2	1473.2	3446.1	4711.6
2017	320000	321000	0.117649	1	0.406038	4380.06	755.659	9630.8	40020	2532.4	2428	3627.2	1473.2	3446.1	4711.6
2017	320000	321100	0.129809	1	0.406038	4405.96	688.811	9630.8	40020	2532.4	2428	3627.2	1473.2	3446.1	4711.6
2017	320000	321200	0.0990041	1	0.374292	4093.68	611.283	9630.8	40020	2532.4	2428	3627.2	1473.2	3446.1	4711.6
2017	320000	321300	0.0723761	1	0.440004	4427.42	839.611	9630.8	40020	2532.4	2428	3627.2	1473.2	3446.1	4711.6
2017	330000	330100	0.398068	1	0.387242	3722.94	614.766	11159.9	45476	2867.2	2480	4052.4	1551.8	4096.2	5511.9
2017	330000	330200	0.198268	1	0.40256	4093.68	715.718	11159.9	45476	2867.2	2480	4052.4	1551.8	4096.2	5511.9
2017	330000	330300	0.128127	1	0.410626	4229.1	769.898	11159.9	45476	2867.2	2480	4052.4	1551.8	4096.2	5511.9
2017	330000	330400	0.166603	1	0.428312	4181.74	702.027	11159.9	45476	2867.2	2480	4052.4	1551.8	4096.2	5511.9
2017	330000	330500	0.148497	1	0.371258	3922	533.511	11159.9	45476	2867.2	2480	4052.4	1551.8	4096.2	5511.9
2017	330000	330600	0.12862	1	0.429052	4363.78	666.804	11159.9	45476	2867.2	2480	4052.4	1551.8	4096.2	5511.9
2017	330000	330700	0.153134	1	0.412402	4358.6	747.81	11159.9	45476	2867.2	2480	4052.4	1551.8	4096.2	5511.9
2017	330000	330800	0.0909731	1	0.410848	4252.04	806.346	11159.9	45476	2867.2	2480	4052.4	1551.8	4096.2	5511.9
2017	330000	330900	0.15498	1	0.385392	3725.9	508.163	11159.9	45476	2867.2	2480	4052.4	1551.8	4096.2	5511.9
2017	330000	331000	0.111532	1	0.430458	3943.46	605.639	11159.9	45476	2867.2	2480	4052.4	1551.8	4096.2	5511.9
2017	330000	331100	0.0891892	1	0.428386	4122.54	838.159	11159.9	45476	2867.2	2480	4052.4	1551.8	4096.2	5511.9
2017	340000	340100	0.15586	1	0.246716	2910.42	586.581	9630.8	40020	2532.4	2428	3627.2	1473.2	3446.1	4711.6
2017	340000	340200	0.0889236	1	0.289118	2732.08	392.655	9630.8	40020	2532.4	2428	3627.2	1473.2	3446.1	4711.6
2017	340000	340300	0.0647228	1	0.240352	2325.08	381.539	9630.8	40020	2532.4	2428	3627.2	1473.2	3446.1	4711.6
2017	340000	340400	0.0579437	1	0.286824	2692.86	521.151	9630.8	40020	2532.4	2428	3627.2	1473.2	3446.1	4711.6
2017	340000	340500	0.0863839	1	0.281422	2427.94	444.71	9630.8	40020	2532.4	2428	3627.2	1473.2	3446.1	4711.6
2017	340000	340600	0.0732664	1	0.264476	2852.7	449.559	9630.8	40020	2532.4	2428	3627.2	1473.2	3446.1	4711.6
2017	340000	340700	0.0902099	1	0.294964	2510.82	357.152	9630.8	40020	2532.4	2428	3627.2	1473.2	3446.1	4711.6
2017	340000	340800	0.0612783	1	0.287638	2450.88	356.893	9630.8	40020	2532.4	2428	3627.2	1473.2	3446.1	4711.6
2017	340000	341000	0.0789725	1	0.26196	2509.34	473.197	9630.8	40020	2532.4	2428	3627.2	1473.2	3446.1	4711.6
2017	340000	341100	0.0731358	1	0.281792	2486.4	394.026	9630.8	40020	2532.4	2428	3627.2	1473.2	3446.1	4711.6
2017	340000	341200	0.0388819	1	0.265586	2260.7	440.824	9630.8	40020	2532.4	2428	3627.2	1473.2	3446.1	4711.6
2017	340000	341300	0.0467922	1	0.274096	2343.58	324.684	9630.8	40020	2532.4	2428	3627.2	1473.2	3446.1	4711.6
2017	340000	341500	0.071268	1	0.272394	2314.72	306.977	9630.8	40020	2532.4	2428	3627.2	1473.2	3446.1	4711.6
2017	340000	341600	0.0367027	1	0.25197	2450.88	384.115	9630.8	40020	2532.4	2428	3627.2	1473.2	3446.1	4711.6
2017	340000	341700	0.0687644	1	0.243238	2382.06	372.705	9630.8	40020	2532.4	2428	3627.2	1473.2	3446.1	4711.6
2017	340000	341800	0.073638	1	0.25826	2464.94	474.948	9630.8	40020	2532.4	2428	3627.2	1473.2	3446.1	4711.6
2017	360000	360100	0.217181	1	0.280386	2868.98	425.925	9630.8	40020	2532.4	2428	3627.2	1473.2	3446.1	4711.6
2017	360000	360200	0.0682305	1	0.237614	2226.66	435.983	9630.8	40020	2532.4	2428	3627.2	1473.2	3446.1	4711.6
2017	360000	360300	0.0720965	1	0.249676	2366.52	483.349	9630.8	40020	2532.4	2428	3627.2	1473.2	3446.1	4711.6
2017	360000	360400	0.0667571	1	0.226366	2810.52	460.433	9630.8	40020	2532.4	2428	3627.2	1473.2	3446.1	4711.6
2017	360000	360500	0.104641	1	0.223554	2362.82	417.285	9630.8	40020	2532.4	2428	3627.2	1473.2	3446.1	4711.6
2017	360000	360600	0.0704045	1	0.24383	2530.06	348.552	9630.8	40020	2532.4	2428	3627.2	1473.2	3446.1	4711.6
2017	360000	360700	0.0590553	1	0.236356	2727.64	343.83	9630.8	40020	2532.4	2428	3627.2	1473.2	3446.1	4711.6
2017	360000	360800	0.0587855	1	0.223776	2944.46	494.849	9630.8	40020	2532.4	2428	3627.2	1473.2	3446.1	4711.6
2017	360000	360900	0.0533195	1	0.289118	2925.22	404.177	9630.8	40020	2532.4	2428	3627.2	1473.2	3446.1	4711.6
2017	360000	361000	0.0549317	1	0.285196	2271.8	372.417	9630.8	40020	2532.4	2428	3627.2	1473.2	3446.1	4711.6
2017	360000	361100	0.0508086	1	0.2701	2570.02	411.638	9630.8	40020	2532.4	2428	3627.2	1473.2	3446.1	4711.6
2017	420000	420100	0.21625	1	0.42032	4225.4	705.717	9630.8	40020	2532.4	2428	3627.2	1473.2	3446.1	4711.6
2017	420000	420200	0.0730955	1	0.419506	4150.66	824.147	9630.8	40020	2532.4	2428	3627.2	1473.2	3446.1	4711.6
2017	420000	420300	0.0862566	1	0.405076	4319.38	772.016	9630.8	40020	2532.4	2428	3627.2	1473.2	3446.1	4711.6
2017	420000	420500	0.0920456	1	0.422096	4085.54	764.713	9630.8	40020	2532.4	2428	3627.2	1473.2	3446.1	4711.6
2017	420000	420600	0.0803859	1	0.416102	3874.64	514.007	9630.8	40020	2532.4	2428	3627.2	1473.2	3446.1	4711.6
2017	420000	420700	0.0910226	1	0.37851	4075.18	609.399	9630.8	40020	2532.4	2428	3627.2	1473.2	3446.1	4711.6
2017	420000	420800	0.0768107	1	0.38591	3986.38	812.899	9630.8	40020	2532.4	2428	3627.2	1473.2	3446.1	4711.6
2017	420000	420900	0.0609759	1	0.382062	4229.1	689.667	9630.8	40020	2532.4	2428	3627.2	1473.2	3446.1	4711.6
2017	420000	421000	0.0625555	1	0.436156	3984.9	582.974	9630.8	40020	2532.4	2428	3627.2	1473.2	3446.1	4711.6
2017	420000	421100	0.0528105	1	0.381174	4255.74	646.273	9630.8	40020	2532.4	2428	3627.2	1473.2	3446.1	4711.6
2017	420000	421200	0.0595941	1	0.40774	3981.2	551.827	9630.8	40020	2532.4	2428	3627.2	1473.2	3446.1	4711.6
2017	420000	421300	0.0559095	1	0.413586	3714.8	574.202	9630.8	40020	2532.4	2428	3627.2	1473.2	3446.1	4711.6
2017	430000	430100	0.150427	1	0.439782	4404.48	688.451	9630.8	40020	2532.4	2428	3627.2	1473.2	3446.1	4711.6
2017	430000	430200	0.0778219	1	0.391682	4114.4	613.932	9630.8	40020	2532.4	2428	3627.2	1473.2	3446.1	4711.6
2017	430000	430300	0.0754164	1	0.435194	4162.5	759.36	9630.8	40020	2532.4	2428	3627.2	1473.2	3446.1	4711.6
2017	430000	430400	0.0524497	1	0.412106	3734.78	511.236	9630.8	40020	2532.4	2428	3627.2	1473.2	3446.1	4711.6
2017	430000	430500	0.0500003	1	0.389832	4033.74	751.515	9630.8	40020	2532.4	2428	3627.2	1473.2	3446.1	4711.6
2017	430000	430600	0.0660023	1	0.42846	4083.32	631.822	9630.8	40020	2532.4	2428	3627.2	1473.2	3446.1	4711.6
2017	430000	430700	0.0648094	1	0.39405	4263.14	626.181	9630.8	40020	2532.4	2428	3627.2	1473.2	3446.1	4711.6
2017	430000	430800	0.0722039	1	0.379546	4073.7	632.979	9630.8	40020	2532.4	2428	3627.2	1473.2	3446.1	4711.6
2017	430000	430900	0.0526198	1	0.382802	4081.84	601.219	9630.8	40020	2532.4	2428	3627.2	1473.2	3446.1	4711.6
2017	430000	431000	0.0598659	1	0.434898	4085.54	752.88	9630.8	40020	2532.4	2428	3627.2	1473.2	3446.1	4711.6
2017	430000	431100	0.0472727	1	0.385688	4021.9	780.19	9630.8	40020	2532.4	2428	3627.2	1473.2	3446.1	4711.6
2017	430000	431200	0.0556099	1	0.408554	3723.68	567.664	9630.8	40020	2532.4	2428	3627.2	1473.2	3446.1	4711.6
2017	430000	431300	0.0541435	1	0.437192	4289.78	617.727	9630.8	40020	2532.4	2428	3627.2	1473.2	3446.1	4711.6
2016	310000	310000	0.270558	1	#N/A		#N/A	9306.9	39520	2231.2	2385	3187.1	1409.7	3446.1	4451.2
2016	320000	320100	0.265766	1	0.412056	3940.56	606.547	9306.9	39520	2231.2	2385	3187.1	1409.7	3446.1	4451.2
2016	320000	320200	0.142708	1	0.37728	3802.32	509.423	9306.9	39520	2231.2	2385	3187.1	1409.7	3446.1	4451.2
2016	320000	320300	0.0512557	1	0.382392	3848.4	682.606	9306.9	39520	2231.2	2385	3187.1	1409.7	3446.1	4451.2
2016	320000	320400	0.106538	1	0.418968	4314.24	666.134	9306.9	39520	2231.2	2385	3187.1	1409.7	3446.1	4451.2
2016	320000	320500	0.173308	1	0.366192	3616.56	577.626	9306.9	39520	2231.2	2385	3187.1	1409.7	3446.1	4451.2
2016	320000	320600	0.0673239	1	0.37656	4269.6	625.347	9306.9	39520	2231.2	2385	3187.1	1409.7	3446.1	4451.2
2016	320000	320700	0.054539	1	0.398088	3787.2	632.72	9306.9	39520	2231.2	2385	3187.1	1409.7	3446.1	4451.2
2016	320000	320800	0.0510173	1	0.369792	4128.48	546.013	9306.9	39520	2231.2	2385	3187.1	1409.7	3446.1	4451.2
2016	320000	320900	0.051939	1	0.40788	3876.48	583.739	9306.9	39520	2231.2	2385	3187.1	1409.7	3446.1	4451.2
2016	320000	321000	0.0800273	1	0.374544	4160.88	636.632	9306.9	39520	2231.2	2385	3187.1	1409.7	3446.1	4451.2
2016	320000	321100	0.0825023	1	0.381456	3740.4	752.461	9306.9	39520	2231.2	2385	3187.1	1409.7	3446.1	4451.2
2016	320000	321200	0.0652956	1	0.407304	4209.12	829.049	9306.9	39520	2231.2	2385	3187.1	1409.7	3446.1	4451.2
2016	320000	321300	0.0471638	1	0.422712	3790.08	494.261	9306.9	39520	2231.2	2385	3187.1	1409.7	3446.1	4451.2
2016	330000	330100	0.253582	1	0.414216	3975.84	732.591	9630.8	40020	2532.4	2428	3627.2	1473.2	3446.1	4711.6
2016	330000	330200	0.121904	1	0.414144	3924.72	603.862	9630.8	40020	2532.4	2428	3627.2	1473.2	3446.1	4711.6
2016	330000	330300	0.0865716	1	0.394848	4217.04	689.066	9630.8	40020	2532.4	2428	3627.2	1473.2	3446.1	4711.6
2016	330000	330400	0.113394	1	0.367416	4271.04	688.217	9630.8	40020	2532.4	2428	3627.2	1473.2	3446.1	4711.6
2016	330000	330500	0.0903779	1	0.405144	4119.84	634.591	9630.8	40020	2532.4	2428	3627.2	1473.2	3446.1	4711.6
2016	330000	330600	0.0843734	1	0.425808	3762.72	598.057	9630.8	40020	2532.4	2428	3627.2	1473.2	3446.1	4711.6
2016	330000	330700	0.0981644	1	0.37548	4227.12	675.853	9630.8	40020	2532.4	2428	3627.2	1473.2	3446.1	4711.6
2016	330000	330800	0.056539	1	0.362952	3632.4	711.069	9630.8	40020	2532.4	2428	3627.2	1473.2	3446.1	4711.6
2016	330000	330900	0.169285	1	0.361296	3851.28	564.532	9630.8	40020	2532.4	2428	3627.2	1473.2	3446.1	4711.6
2016	330000	331000	0.0762558	1	0.382248	3630.96	714.078	9630.8	40020	2532.4	2428	3627.2	1473.2	3446.1	4711.6
2016	330000	331100	0.060153	1	0.414216	3669.84	642.786	9630.8	40020	2532.4	2428	3627.2	1473.2	3446.1	4711.6
2016	340000	340100	0.105206	1	0.236808	2336.4	335.73	9306.9	39520	2231.2	2385	3187.1	1409.7	3446.1	4451.2
2016	340000	340200	0.0629989	1	0.218808	2610	402.949	9306.9	39520	2231.2	2385	3187.1	1409.7	3446.1	4451.2
2016	340000	340300	0.0428609	1	0.237312	2879.28	563.72	9306.9	39520	2231.2	2385	3187.1	1409.7	3446.1	4451.2
2016	340000	340400	0.0434694	1	0.27288	2504.88	486.306	9306.9	39520	2231.2	2385	3187.1	1409.7	3446.1	4451.2
2016	340000	340500	0.0584824	1	0.22032	2477.52	356.825	9306.9	39520	2231.2	2385	3187.1	1409.7	3446.1	4451.2
2016	340000	340600	0.0562541	1	0.224136	2651.76	467.568	9306.9	39520	2231.2	2385	3187.1	1409.7	3446.1	4451.2
2016	340000	340700	0.0441867	1	0.269568	2404.08	445.92	9306.9	39520	2231.2	2385	3187.1	1409.7	3446.1	4451.2
2016	340000	340800	0.0414964	1	0.276552	2771.28	406.847	9306.9	39520	2231.2	2385	3187.1	1409.7	3446.1	4451.2
2016	340000	341000	0.0512346	1	0.259992	2638.8	403.813	9306.9	39520	2231.2	2385	3187.1	1409.7	3446.1	4451.2
2016	340000	341100	0.0520225	1	0.264888	2247.12	348.588	9306.9	39520	2231.2	2385	3187.1	1409.7	3446.1	4451.2
2016	340000	341200	0.0238807	1	0.274824	2764.8	451.23	9306.9	39520	2231.2	2385	3187.1	1409.7	3446.1	4451.2
2016	340000	341300	0.0432932	1	0.264096	2424.24	424.292	9306.9	39520	2231.2	2385	3187.1	1409.7	3446.1	4451.2
2016	340000	341500	0.0431846	1	0.249696	2262.24	398.325	9306.9	39520	2231.2	2385	3187.1	1409.7	3446.1	4451.2
2016	340000	341600	0.0332372	1	0.265392	2183.76	366.76	9306.9	39520	2231.2	2385	3187.1	1409.7	3446.1	4451.2
2016	340000	341700	0.0463641	1	0.28476	2605.68	470.421	9306.9	39520	2231.2	2385	3187.1	1409.7	3446.1	4451.2
2016	340000	341800	0.0474037	1	0.263016	2676.24	472.637	9306.9	39520	2231.2	2385	3187.1	1409.7	3446.1	4451.2
2016	360000	360100	0.106164	1	0.280512	2579.04	398.414	9306.9	39520	2231.2	2385	3187.1	1409.7	3446.1	4451.2
2016	360000	360200	0.0511919	1	0.261144	2563.2	357.512	9306.9	39520	2231.2	2385	3187.1	1409.7	3446.1	4451.2
2016	360000	360300	0.0473639	1	0.231264	2276.64	296.595	9306.9	39520	2231.2	2385	3187.1	1409.7	3446.1	4451.2
2016	360000	360400	0.0452374	1	0.240912	2849.04	429.942	9306.9	39520	2231.2	2385	3187.1	1409.7	3446.1	4451.2
2016	360000	360500	0.0767445	1	0.257472	2797.2	484.135	9306.9	39520	2231.2	2385	3187.1	1409.7	3446.1	4451.2
2016	360000	360600	0.0548083	1	0.23832	2190.24	289.498	9306.9	39520	2231.2	2385	3187.1	1409.7	3446.1	4451.2
2016	360000	360700	0.0408154	1	0.243144	2488.32	343.743	9306.9	39520	2231.2	2385	3187.1	1409.7	3446.1	4451.2
2016	360000	360800	0.0352544	1	0.266976	2337.12	402.415	9306.9	39520	2231.2	2385	3187.1	1409.7	3446.1	4451.2
2016	360000	360900	0.034176	1	0.245088	2751.12	381.602	9306.9	39520	2231.2	2385	3187.1	1409.7	3446.1	4451.2
2016	360000	361000	0.0359361	1	0.2628	2417.04	345.288	9306.9	39520	2231.2	2385	3187.1	1409.7	3446.1	4451.2
2016	360000	361100	0.0327676	1	0.217656	2703.6	523.652	9306.9	39520	2231.2	2385	3187.1	1409.7	3446.1	4451.2
2016	420000	420100	0.134236	1	0.3924	3735.36	528.939	9306.9	39520	2231.2	2385	3187.1	1409.7	3446.1	4451.2
2016	420000	420200	0.0498665	1	0.384984	4055.04	772.099	9306.9	39520	2231.2	2385	3187.1	1409.7	3446.1	4451.2
2016	420000	420300	0.0577202	1	0.40608	3782.88	562.87	9306.9	39520	2231.2	2385	3187.1	1409.7	3446.1	4451.2
2016	420000	420500	0.0705504	1	0.417672	3644.64	637.797	9306.9	39520	2231.2	2385	3187.1	1409.7	3446.1	4451.2
2016	420000	420600	0.0497024	1	0.389664	3706.56	567.612	9306.9	39520	2231.2	2385	3187.1	1409.7	3446.1	4451.2
2016	420000	420700	0.0765993	1	0.384768	3906	540.766	9306.9	39520	2231.2	2385	3187.1	1409.7	3446.1	4451.2
2016	420000	420800	0.0524217	1	0.36936	3911.76	696.36	9306.9	39520	2231.2	2385	3187.1	1409.7	3446.1	4451.2
2016	420000	420900	0.0416273	1	0.413784	3962.16	706.849	9306.9	39520	2231.2	2385	3187.1	1409.7	3446.1	4451.2
2016	420000	421000	0.0445959	1	0.409824	4297.68	635.021	9306.9	39520	2231.2	2385	3187.1	1409.7	3446.1	4451.2
2016	420000	421100	0.036206	1	0.3654	3765.6	678.897	9306.9	39520	2231.2	2385	3187.1	1409.7	3446.1	4451.2
2016	420000	421200	0.049188	1	0.374544	3902.4	659.303	9306.9	39520	2231.2	2385	3187.1	1409.7	3446.1	4451.2
2016	420000	421300	0.0387877	1	0.421776	4246.56	696.478	9306.9	39520	2231.2	2385	3187.1	1409.7	3446.1	4451.2
2016	430000	430100	0.103933	1	0.381744	3695.76	656.133	9306.9	39520	2231.2	2385	3187.1	1409.7	3446.1	4451.2
2016	430000	430200	0.0543311	1	0.413856	4074.48	648.415	9306.9	39520	2231.2	2385	3187.1	1409.7	3446.1	4451.2
2016	430000	430300	0.065358	1	0.423936	4069.44	657.914	9306.9	39520	2231.2	2385	3187.1	1409.7	3446.1	4451.2
2016	430000	430400	0.0331089	1	0.361728	3602.88	587.888	9306.9	39520	2231.2	2385	3187.1	1409.7	3446.1	4451.2
2016	430000	430500	0.036475	1	0.362016	4029.84	777.791	9306.9	39520	2231.2	2385	3187.1	1409.7	3446.1	4451.2
2016	430000	430600	0.04272	1	0.428616	4273.2	689.106	9306.9	39520	2231.2	2385	3187.1	1409.7	3446.1	4451.2
2016	430000	430700	0.039703	1	0.427608	3641.76	495.397	9306.9	39520	2231.2	2385	3187.1	1409.7	3446.1	4451.2
2016	430000	430800	0.0445437	1	0.370224	3799.44	637.395	9306.9	39520	2231.2	2385	3187.1	1409.7	3446.1	4451.2
2016	430000	430900	0.0304355	1	0.424872	3826.08	472.179	9306.9	39520	2231.2	2385	3187.1	1409.7	3446.1	4451.2
2016	430000	431000	0.0360763	1	0.372456	3867.84	751.79	9306.9	39520	2231.2	2385	3187.1	1409.7	3446.1	4451.2
2016	430000	431100	0.0275551	1	0.38052	4112.64	804.152	9306.9	39520	2231.2	2385	3187.1	1409.7	3446.1	4451.2
2016	430000	431200	0.049642	1	0.381168	4103.28	740.214	9306.9	39520	2231.2	2385	3187.1	1409.7	3446.1	4451.2
2016	430000	431300	0.0335572	1	0.428328	3774.96	596.138	9306.9	39520	2231.2	2385	3187.1	1409.7	3446.1	4451.2
2015	310000	310000	0.382877	1	#N/A		#N/A	9264.5	40193	1980.7	2325	2837	1406.7	3829.3	4028.5
2015	320000	320100	0.34765	1	0.40152	4026.4	522.584	9264.5	40193	1980.7	2325	2837	1406.7	3829.3	4028.5
2015	320000	320200	0.191953	1	0.41062	3984.4	692.842	9264.5	40193	1980.7	2325	2837	1406.7	3829.3	4028.5
2015	320000	320300	0.0684946	1	0.3808	3790.5	671.727	9264.5	40193	1980.7	2325	2837	1406.7	3829.3	4028.5
2015	320000	320400	0.145403	1	0.3885	3819.9	572.431	9264.5	40193	1980.7	2325	2837	1406.7	3829.3	4028.5
2015	320000	320500	0.239183	1	0.35539	4123.7	757.276	9264.5	40193	1980.7	2325	2837	1406.7	3829.3	4028.5
2015	320000	320600	0.0921576	1	0.37863	3735.9	592.845	9264.5	40193	1980.7	2325	2837	1406.7	3829.3	4028.5
2015	320000	320700	0.0714996	1	0.36659	3569.3	631.782	9264.5	40193	1980.7	2325	2837	1406.7	3829.3	4028.5
2015	320000	320800	0.0662819	1	0.36617	3594.5	500.309	9264.5	40193	1980.7	2325	2837	1406.7	3829.3	4028.5
2015	320000	320900	0.066855	1	0.35784	4097.1	649.154	9264.5	40193	1980.7	2325	2837	1406.7	3829.3	4028.5
2015	320000	321000	0.107302	1	0.36806	4143.3	794.221	9264.5	40193	1980.7	2325	2837	1406.7	3829.3	4028.5
2015	320000	321100	0.114648	1	0.41363	3627.4	693.787	9264.5	40193	1980.7	2325	2837	1406.7	3829.3	4028.5
2015	320000	321200	0.084052	1	0.39879	3836.7	657.466	9264.5	40193	1980.7	2325	2837	1406.7	3829.3	4028.5
2015	320000	321300	0.0581341	1	0.38892	3802.4	560.489	9264.5	40193	1980.7	2325	2837	1406.7	3829.3	4028.5
2015	330000	330100	0.323553	1	0.39382	3941.7	728.417	9306.9	39520	2231.2	2385	3187.1	1409.7	3446.1	4451.2
2015	330000	330200	0.186787	1	0.41958	3867.5	555.872	9306.9	39520	2231.2	2385	3187.1	1409.7	3446.1	4451.2
2015	330000	330300	0.136617	1	0.38353	3814.3	602.185	9306.9	39520	2231.2	2385	3187.1	1409.7	3446.1	4451.2
2015	330000	330400	0.167298	1	0.40432	4078.2	656.806	9306.9	39520	2231.2	2385	3187.1	1409.7	3446.1	4451.2
2015	330000	330500	0.138327	1	0.35007	3902.5	706.603	9306.9	39520	2231.2	2385	3187.1	1409.7	3446.1	4451.2
2015	330000	330600	0.132261	1	0.39277	3707.9	509.037	9306.9	39520	2231.2	2385	3187.1	1409.7	3446.1	4451.2
2015	330000	330700	0.156123	1	0.35742	3625.3	590.745	9306.9	39520	2231.2	2385	3187.1	1409.7	3446.1	4451.2
2015	330000	330800	0.0974296	1	0.40292	3535.7	559.457	9306.9	39520	2231.2	2385	3187.1	1409.7	3446.1	4451.2
2015	330000	330900	0.319026	1	0.36932	4080.3	599.221	9306.9	39520	2231.2	2385	3187.1	1409.7	3446.1	4451.2
2015	330000	331000	0.119141	1	0.36827	3812.2	709.19	9306.9	39520	2231.2	2385	3187.1	1409.7	3446.1	4451.2
2015	330000	331100	0.0945673	1	0.35924	3901.1	534.955	9306.9	39520	2231.2	2385	3187.1	1409.7	3446.1	4451.2
2015	340000	340100	0.14753	1	0.26467	2192.4	421.078	9264.5	40193	1980.7	2325	2837	1406.7	3829.3	4028.5
2015	340000	340200	0.089818	1	0.27433	2688.7	527.775	9264.5	40193	1980.7	2325	2837	1406.7	3829.3	4028.5
2015	340000	340300	0.0631783	1	0.22197	2227.4	341.189	9264.5	40193	1980.7	2325	2837	1406.7	3829.3	4028.5
2015	340000	340400	0.0713967	1	0.26817	2671.9	448.034	9264.5	40193	1980.7	2325	2837	1406.7	3829.3	4028.5
2015	340000	340500	0.0727869	1	0.24843	2307.2	360.183	9264.5	40193	1980.7	2325	2837	1406.7	3829.3	4028.5
2015	340000	340600	0.0673833	1	0.24493	2170	315.667	9264.5	40193	1980.7	2325	2837	1406.7	3829.3	4028.5
2015	340000	340700	0.108332	1	0.22652	2716	510.391	9264.5	40193	1980.7	2325	2837	1406.7	3829.3	4028.5
2015	340000	340800	0.0563456	1	0.21231	2393.3	440.65	9264.5	40193	1980.7	2325	2837	1406.7	3829.3	4028.5
2015	340000	341000	0.07708	1	0.27328	2373.7	351.39	9264.5	40193	1980.7	2325	2837	1406.7	3829.3	4028.5
2015	340000	341100	0.0693006	1	0.25564	2332.4	383.109	9264.5	40193	1980.7	2325	2837	1406.7	3829.3	4028.5
2015	340000	341200	0.0319001	1	0.26908	2545.2	454.933	9264.5	40193	1980.7	2325	2837	1406.7	3829.3	4028.5
2015	340000	341300	0.0642329	1	0.27475	2704.8	529.332	9264.5	40193	1980.7	2325	2837	1406.7	3829.3	4028.5
2015	340000	341500	0.0521807	1	0.25669	2183.3	422.072	9264.5	40193	1980.7	2325	2837	1406.7	3829.3	4028.5
2015	340000	341600	0.0410409	1	0.24115	2795.8	379.874	9264.5	40193	1980.7	2325	2837	1406.7	3829.3	4028.5
2015	340000	341700	0.0662015	1	0.22211	2268.7	352.127	9264.5	40193	1980.7	2325	2837	1406.7	3829.3	4028.5
2015	340000	341800	0.072023	1	0.22414	2541.7	448.747	9264.5	40193	1980.7	2325	2837	1406.7	3829.3	4028.5
2015	360000	360100	0.14959	1	0.22582	2426.2	370.152	9264.5	40193	1980.7	2325	2837	1406.7	3829.3	4028.5
2015	360000	360200	0.0774748	1	0.21721	2398.2	384.15	9264.5	40193	1980.7	2325	2837	1406.7	3829.3	4028.5
2015	360000	360300	0.0645813	1	0.21777	2536.1	345.301	9264.5	40193	1980.7	2325	2837	1406.7	3829.3	4028.5
2015	360000	360400	0.0676136	1	0.22365	2378.6	402.296	9264.5	40193	1980.7	2325	2837	1406.7	3829.3	4028.5
2015	360000	360500	0.0912211	1	0.22841	2208.5	316.77	9264.5	40193	1980.7	2325	2837	1406.7	3829.3	4028.5
2015	360000	360600	0.068156	1	0.25662	2179.1	337.5	9264.5	40193	1980.7	2325	2837	1406.7	3829.3	4028.5
2015	360000	360700	0.0615863	1	0.23387	2193.1	374.281	9264.5	40193	1980.7	2325	2837	1406.7	3829.3	4028.5
2015	360000	360800	0.0467549	1	0.24661	2219.7	350.583	9264.5	40193	1980.7	2325	2837	1406.7	3829.3	4028.5
2015	360000	360900	0.0484276	1	0.27671	2535.4	387.676	9264.5	40193	1980.7	2325	2837	1406.7	3829.3	4028.5
2015	360000	361000	0.0507586	1	0.273	2454.2	381.492	9264.5	40193	1980.7	2325	2837	1406.7	3829.3	4028.5
2015	360000	361100	0.0518854	1	0.25074	2333.1	306.931	9264.5	40193	1980.7	2325	2837	1406.7	3829.3	4028.5
2015	420000	420100	0.194015	1	0.4081	3732.4	482.413	9264.5	40193	1980.7	2325	2837	1406.7	3829.3	4028.5
2015	420000	420200	0.074235	1	0.37261	4032	711.75	9264.5	40193	1980.7	2325	2837	1406.7	3829.3	4028.5
2015	420000	420300	0.0831294	1	0.38878	4060	566.964	9264.5	40193	1980.7	2325	2837	1406.7	3829.3	4028.5
2015	420000	420500	0.0943863	1	0.40187	3917.9	556.155	9264.5	40193	1980.7	2325	2837	1406.7	3829.3	4028.5
2015	420000	420600	0.0742943	1	0.35952	4070.5	639.824	9264.5	40193	1980.7	2325	2837	1406.7	3829.3	4028.5
2015	420000	420700	0.0838554	1	0.3647	3787	553.027	9264.5	40193	1980.7	2325	2837	1406.7	3829.3	4028.5
2015	420000	420800	0.0740538	1	0.41496	3597.3	584.4	9264.5	40193	1980.7	2325	2837	1406.7	3829.3	4028.5
2015	420000	420900	0.0564288	1	0.37835	3979.5	603.852	9264.5	40193	1980.7	2325	2837	1406.7	3829.3	4028.5
2015	420000	421000	0.0656212	1	0.36904	4106.9	651.249	9264.5	40193	1980.7	2325	2837	1406.7	3829.3	4028.5
2015	420000	421100	0.0507278	1	0.40159	3873.1	677.284	9264.5	40193	1980.7	2325	2837	1406.7	3829.3	4028.5
2015	420000	421200	0.0665582	1	0.37254	3929.1	755.658	9264.5	40193	1980.7	2325	2837	1406.7	3829.3	4028.5
2015	420000	421300	0.0552759	1	0.38353	3538.5	488.555	9264.5	40193	1980.7	2325	2837	1406.7	3829.3	4028.5
2015	430000	430100	0.150442	1	0.38073	3735.2	637.923	9264.5	40193	1980.7	2325	2837	1406.7	3829.3	4028.5
2015	430000	430200	0.0825238	1	0.36197	4093.6	628.927	9264.5	40193	1980.7	2325	2837	1406.7	3829.3	4028.5
2015	430000	430300	0.0905772	1	0.37534	3737.3	587.022	9264.5	40193	1980.7	2325	2837	1406.7	3829.3	4028.5
2015	430000	430400	0.0568944	1	0.36365	4170.6	768.694	9264.5	40193	1980.7	2325	2837	1406.7	3829.3	4028.5
2015	430000	430500	0.0427803	1	0.3563	3541.3	564.744	9264.5	40193	1980.7	2325	2837	1406.7	3829.3	4028.5
2015	430000	430600	0.0737551	1	0.41958	3856.3	652.967	9264.5	40193	1980.7	2325	2837	1406.7	3829.3	4028.5
2015	430000	430700	0.056626	1	0.37681	3870.3	550.965	9264.5	40193	1980.7	2325	2837	1406.7	3829.3	4028.5
2015	430000	430800	0.0740396	1	0.3535	3959.9	656.549	9264.5	40193	1980.7	2325	2837	1406.7	3829.3	4028.5
2015	430000	430900	0.0463189	1	0.37919	3915.8	731.243	9264.5	40193	1980.7	2325	2837	1406.7	3829.3	4028.5
2015	430000	431000	0.061407	1	0.37772	3894.8	624.25	9264.5	40193	1980.7	2325	2837	1406.7	3829.3	4028.5
2015	430000	431100	0.038066	1	0.38682	3584	491.663	9264.5	40193	1980.7	2325	2837	1406.7	3829.3	4028.5
2015	430000	431200	0.0580103	1	0.40355	3823.4	662.942	9264.5	40193	1980.7	2325	2837	1406.7	3829.3	4028.5
2015	430000	431300	0.0483397	1	0.37898	3897.6	768.503	9264.5	40193	1980.7	2325	2837	1406.7	3829.3	4028.5
2014	310000	310000	0.362641	1	#N/A		#N/A	8392.6	36988	1818.4	2285	2563.5	1326.6	3479.9	3586.2
2014	320000	320100	0.340273	1	0.39406	3681.52	652.781	8392.6	36988	1818.4	2285	2563.5	1326.6	3479.9	3586.2
2014	320000	320200	0.174555	1	0.363324	3417	519.549	8392.6	36988	1818.4	2285	2563.5	1326.6	3479.9	3586.2
2014	320000	320300	0.0588442	1	0.40562	3727.08	611.113	8392.6	36988	1818.4	2285	2563.5	1326.6	3479.9	3586.2
2014	320000	320400	0.128555	1	0.40562	3646.16	555.618	8392.6	36988	1818.4	2285	2563.5	1326.6	3479.9	3586.2
2014	320000	320500	0.227287	1	0.357272	3597.88	626.921	8392.6	36988	1818.4	2285	2563.5	1326.6	3479.9	3586.2
2014	320000	320600	0.0822441	1	0.399568	3917.48	663.375	8392.6	36988	1818.4	2285	2563.5	1326.6	3479.9	3586.2
2014	320000	320700	0.0600674	1	0.368016	3694.44	627.569	8392.6	36988	1818.4	2285	2563.5	1326.6	3479.9	3586.2
2014	320000	320800	0.055075	1	0.370464	3663.84	519.884	8392.6	36988	1818.4	2285	2563.5	1326.6	3479.9	3586.2
2014	320000	320900	0.0530227	1	0.340544	3417.68	540.606	8392.6	36988	1818.4	2285	2563.5	1326.6	3479.9	3586.2
2014	320000	321000	0.0941387	1	0.389844	3988.2	673.867	8392.6	36988	1818.4	2285	2563.5	1326.6	3479.9	3586.2
2014	320000	321100	0.102118	1	0.343264	3618.28	602.33	8392.6	36988	1818.4	2285	2563.5	1326.6	3479.9	3586.2
2014	320000	321200	0.0748657	1	0.347752	3822.96	563.238	8392.6	36988	1818.4	2285	2563.5	1326.6	3479.9	3586.2
2014	320000	321300	0.0451302	1	0.341224	3695.8	586.834	8392.6	36988	1818.4	2285	2563.5	1326.6	3479.9	3586.2
2014	330000	330100	0.297104	1	0.354552	3840.64	583.689	9264.5	40193	1980.7	2325	2837	1406.7	3829.3	4028.5
2014	330000	330200	0.178228	1	0.390388	3633.24	701.561	9264.5	40193	1980.7	2325	2837	1406.7	3829.3	4028.5
2014	330000	330300	0.119317	1	0.380664	3533.96	672.869	9264.5	40193	1980.7	2325	2837	1406.7	3829.3	4028.5
2014	330000	330400	0.152555	1	0.392088	3638	616.872	9264.5	40193	1980.7	2325	2837	1406.7	3829.3	4028.5
2014	330000	330500	0.138301	1	0.384132	3584.96	510.315	9264.5	40193	1980.7	2325	2837	1406.7	3829.3	4028.5
2014	330000	330600	0.123868	1	0.383044	3855.6	655.555	9264.5	40193	1980.7	2325	2837	1406.7	3829.3	4028.5
2014	330000	330700	0.150163	1	0.348364	3594.48	703.084	9264.5	40193	1980.7	2325	2837	1406.7	3829.3	4028.5
2014	330000	330800	0.0833206	1	0.360332	3529.88	615.317	9264.5	40193	1980.7	2325	2837	1406.7	3829.3	4028.5
2014	330000	330900	0.324024	1	0.375292	3884.16	633.356	9264.5	40193	1980.7	2325	2837	1406.7	3829.3	4028.5
2014	330000	331000	0.107231	1	0.392972	4028.32	655.45	9264.5	40193	1980.7	2325	2837	1406.7	3829.3	4028.5
2014	330000	331100	0.0842079	1	0.35258	3493.16	654.9	9264.5	40193	1980.7	2325	2837	1406.7	3829.3	4028.5
2014	340000	340100	0.118429	1	0.246772	2339.2	308.046	8392.6	36988	1818.4	2285	2563.5	1326.6	3479.9	3586.2
2014	340000	340200	0.0730026	1	0.25466	2370.48	378.378	8392.6	36988	1818.4	2285	2563.5	1326.6	3479.9	3586.2
2014	340000	340300	0.0505265	1	0.261392	2581.96	492.554	8392.6	36988	1818.4	2285	2563.5	1326.6	3479.9	3586.2
2014	340000	340400	0.0585115	1	0.240584	2240.6	321.465	8392.6	36988	1818.4	2285	2563.5	1326.6	3479.9	3586.2
2014	340000	340500	0.0720179	1	0.207468	2057.68	306.124	8392.6	36988	1818.4	2285	2563.5	1326.6	3479.9	3586.2
2014	340000	340600	0.0633204	1	0.255884	2447.32	353.813	8392.6	36988	1818.4	2285	2563.5	1326.6	3479.9	3586.2
2014	340000	340700	0.0954045	1	0.239088	2273.24	409.374	8392.6	36988	1818.4	2285	2563.5	1326.6	3479.9	3586.2
2014	340000	340800	0.0498258	1	0.265812	2352.8	441.557	8392.6	36988	1818.4	2285	2563.5	1326.6	3479.9	3586.2
2014	340000	341000	0.0687779	1	0.262276	2066.52	297.591	8392.6	36988	1818.4	2285	2563.5	1326.6	3479.9	3586.2
2014	340000	341100	0.0603218	1	0.220116	2291.6	296.826	8392.6	36988	1818.4	2285	2563.5	1326.6	3479.9	3586.2
2014	340000	341200	0.0201549	1	0.204408	2052.92	286.913	8392.6	36988	1818.4	2285	2563.5	1326.6	3479.9	3586.2
2014	340000	341300	0.0482142	1	0.219708	2554.76	429.967	8392.6	36988	1818.4	2285	2563.5	1326.6	3479.9	3586.2
2014	340000	341500	0.0312176	1	0.21794	2185.52	289.796	8392.6	36988	1818.4	2285	2563.5	1326.6	3479.9	3586.2
2014	340000	341600	0.0250221	1	0.208148	2325.6	372.673	8392.6	36988	1818.4	2285	2563.5	1326.6	3479.9	3586.2
2014	340000	341700	0.0460347	1	0.25194	2125.68	366.633	8392.6	36988	1818.4	2285	2563.5	1326.6	3479.9	3586.2
2014	340000	341800	0.0629064	1	0.256972	2200.48	338.239	8392.6	36988	1818.4	2285	2563.5	1326.6	3479.9	3586.2
2014	360000	360100	0.14628	1	0.256088	2405.16	401.866	8392.6	36988	1818.4	2285	2563.5	1326.6	3479.9	3586.2
2014	360000	360200	0.0677861	1	0.249696	2058.36	306.81	8392.6	36988	1818.4	2285	2563.5	1326.6	3479.9	3586.2
2014	360000	360300	0.0526374	1	0.220864	2144.04	370.877	8392.6	36988	1818.4	2285	2563.5	1326.6	3479.9	3586.2
2014	360000	360400	0.0551885	1	0.209712	2306.56	376.926	8392.6	36988	1818.4	2285	2563.5	1326.6	3479.9	3586.2
2014	360000	360500	0.0741923	1	0.209644	2565.64	419.17	8392.6	36988	1818.4	2285	2563.5	1326.6	3479.9	3586.2
2014	360000	360600	0.0637118	1	0.258944	2137.92	342.836	8392.6	36988	1818.4	2285	2563.5	1326.6	3479.9	3586.2
2014	360000	360700	0.0455232	1	0.215832	2159.68	358.612	8392.6	36988	1818.4	2285	2563.5	1326.6	3479.9	3586.2
2014	360000	360800	0.0376574	1	0.261392	2545.24	460.872	8392.6	36988	1818.4	2285	2563.5	1326.6	3479.9	3586.2
2014	360000	360900	0.0360098	1	0.269008	2484.72	348.82	8392.6	36988	1818.4	2285	2563.5	1326.6	3479.9	3586.2
2014	360000	361000	0.0393584	1	0.259284	2586.72	522.522	8392.6	36988	1818.4	2285	2563.5	1326.6	3479.9	3586.2
2014	360000	361100	0.0373666	1	0.262752	2480.64	420.922	8392.6	36988	1818.4	2285	2563.5	1326.6	3479.9	3586.2
2014	420000	420100	0.17851	1	0.387736	3442.84	525.033	8392.6	36988	1818.4	2285	2563.5	1326.6	3479.9	3586.2
2014	420000	420200	0.0656073	1	0.405824	3823.64	668.261	8392.6	36988	1818.4	2285	2563.5	1326.6	3479.9	3586.2
2014	420000	420300	0.0747511	1	0.40528	3561.16	520.6	8392.6	36988	1818.4	2285	2563.5	1326.6	3479.9	3586.2
2014	420000	420500	0.0844939	1	0.395828	3835.88	602.081	8392.6	36988	1818.4	2285	2563.5	1326.6	3479.9	3586.2
2014	420000	420600	0.0551345	1	0.385152	3822.96	746.932	8392.6	36988	1818.4	2285	2563.5	1326.6	3479.9	3586.2
2014	420000	420700	0.0723714	1	0.350472	4058.92	532.873	8392.6	36988	1818.4	2285	2563.5	1326.6	3479.9	3586.2
2014	420000	420800	0.0624001	1	0.401608	3914.76	602.673	8392.6	36988	1818.4	2285	2563.5	1326.6	3479.9	3586.2
2014	420000	420900	0.0601415	1	0.374544	3446.92	704.493	8392.6	36988	1818.4	2285	2563.5	1326.6	3479.9	3586.2
2014	420000	421000	0.0521894	1	0.35326	3725.72	574.584	8392.6	36988	1818.4	2285	2563.5	1326.6	3479.9	3586.2
2014	420000	421100	0.040133	1	0.38522	3957.6	561.446	8392.6	36988	1818.4	2285	2563.5	1326.6	3479.9	3586.2
2014	420000	421200	0.0590669	1	0.395556	3708.72	706.027	8392.6	36988	1818.4	2285	2563.5	1326.6	3479.9	3586.2
2014	420000	421300	0.05311	1	0.3706	3689.68	558.353	8392.6	36988	1818.4	2285	2563.5	1326.6	3479.9	3586.2
2014	430000	430100	0.1361	1	0.38998	3902.52	647.146	8392.6	36988	1818.4	2285	2563.5	1326.6	3479.9	3586.2
2014	430000	430200	0.0679175	1	0.373116	3749.52	511.991	8392.6	36988	1818.4	2285	2563.5	1326.6	3479.9	3586.2
2014	430000	430300	0.0964805	1	0.40494	3840.64	642.659	8392.6	36988	1818.4	2285	2563.5	1326.6	3479.9	3586.2
2014	430000	430400	0.0402655	1	0.381072	3661.8	651.106	8392.6	36988	1818.4	2285	2563.5	1326.6	3479.9	3586.2
2014	430000	430500	0.0286792	1	0.37468	3681.52	585.119	8392.6	36988	1818.4	2285	2563.5	1326.6	3479.9	3586.2
2014	430000	430600	0.0513418	1	0.351288	3645.48	641.393	8392.6	36988	1818.4	2285	2563.5	1326.6	3479.9	3586.2
2014	430000	430700	0.048153	1	0.375088	3539.4	442.869	8392.6	36988	1818.4	2285	2563.5	1326.6	3479.9	3586.2
2014	430000	430800	0.0531367	1	0.384744	3703.96	579.431	8392.6	36988	1818.4	2285	2563.5	1326.6	3479.9	3586.2
2014	430000	430900	0.0362929	1	0.34034	3819.56	546.701	8392.6	36988	1818.4	2285	2563.5	1326.6	3479.9	3586.2
2014	430000	431000	0.0432022	1	0.355368	3963.04	573.058	8392.6	36988	1818.4	2285	2563.5	1326.6	3479.9	3586.2
2014	430000	431100	0.0274595	1	0.351288	3714.16	513.191	8392.6	36988	1818.4	2285	2563.5	1326.6	3479.9	3586.2
2014	430000	431200	0.0410441	1	0.359856	3642.76	508.703	8392.6	36988	1818.4	2285	2563.5	1326.6	3479.9	3586.2
2014	430000	431300	0.0387675	1	0.361556	3657.72	539.217	8392.6	36988	1818.4	2285	2563.5	1326.6	3479.9	3586.2
2013	310000	310000	0.499908	1	#N/A		#N/A	7411.8	33103	1695	2253	2370.7	1204.1	3325.9	2881.9
2013	320000	320100	0.350666	1	0.38643	3617.46	590.282	7411.8	33103	1695	2253	2370.7	1204.1	3325.9	2881.9
2013	320000	320200	0.179266	1	0.366762	3392.4	495.764	7411.8	33103	1695	2253	2370.7	1204.1	3325.9	2881.9
2013	320000	320300	0.0630322	1	0.337788	3602.94	504.571	7411.8	33103	1695	2253	2370.7	1204.1	3325.9	2881.9
2013	320000	320400	0.140528	1	0.348876	3348.18	464.739	7411.8	33103	1695	2253	2370.7	1204.1	3325.9	2881.9
2013	320000	320500	0.23943	1	0.395208	3856.38	500.59	7411.8	33103	1695	2253	2370.7	1204.1	3325.9	2881.9
2013	320000	320600	0.0880722	1	0.359832	3447.84	696.921	7411.8	33103	1695	2253	2370.7	1204.1	3325.9	2881.9
2013	320000	320700	0.0994078	1	0.346236	3451.8	558.322	7411.8	33103	1695	2253	2370.7	1204.1	3325.9	2881.9
2013	320000	320800	0.0565071	1	0.335082	3329.04	489.032	7411.8	33103	1695	2253	2370.7	1204.1	3325.9	2881.9
2013	320000	320900	0.0607213	1	0.335346	3696	529.237	7411.8	33103	1695	2253	2370.7	1204.1	3325.9	2881.9
2013	320000	321000	0.0991443	1	0.382338	3767.28	759.904	7411.8	33103	1695	2253	2370.7	1204.1	3325.9	2881.9
2013	320000	321100	0.107743	1	0.387552	3336.96	534.661	7411.8	33103	1695	2253	2370.7	1204.1	3325.9	2881.9
2013	320000	321200	0.0727417	1	0.373956	3579.18	530.401	7411.8	33103	1695	2253	2370.7	1204.1	3325.9	2881.9
2013	320000	321300	0.0522224	1	0.362076	3784.44	519.354	7411.8	33103	1695	2253	2370.7	1204.1	3325.9	2881.9
2013	330000	330100	0.311253	1	0.359172	3324.42	655.979	8392.6	36988	1818.4	2285	2563.5	1326.6	3479.9	3586.2
2013	330000	330200	0.177906	1	0.370062	3872.22	660.131	8392.6	36988	1818.4	2285	2563.5	1326.6	3479.9	3586.2
2013	330000	330300	0.129379	1	0.363132	3814.14	555.221	8392.6	36988	1818.4	2285	2563.5	1326.6	3479.9	3586.2
2013	330000	330400	0.160139	1	0.388476	3532.32	676.196	8392.6	36988	1818.4	2285	2563.5	1326.6	3479.9	3586.2
2013	330000	330500	0.144636	1	0.380952	3441.9	461.821	8392.6	36988	1818.4	2285	2563.5	1326.6	3479.9	3586.2
2013	330000	330600	0.124762	1	0.357192	3630	677.371	8392.6	36988	1818.4	2285	2563.5	1326.6	3479.9	3586.2
2013	330000	330700	0.157699	1	0.37884	3443.88	615.414	8392.6	36988	1818.4	2285	2563.5	1326.6	3479.9	3586.2
2013	330000	330800	0.0885931	1	0.349074	3499.32	460.803	8392.6	36988	1818.4	2285	2563.5	1326.6	3479.9	3586.2
2013	330000	330900	0.150244	1	0.33099	3767.94	629.513	8392.6	36988	1818.4	2285	2563.5	1326.6	3479.9	3586.2
2013	330000	331000	0.113902	1	0.373626	3550.14	609.941	8392.6	36988	1818.4	2285	2563.5	1326.6	3479.9	3586.2
2013	330000	331100	0.092579	1	0.39501	3552.12	629.407	8392.6	36988	1818.4	2285	2563.5	1326.6	3479.9	3586.2
2013	340000	340100	0.107352	1	0.226776	2606.34	487.12	7411.8	33103	1695	2253	2370.7	1204.1	3325.9	2881.9
2013	340000	340200	0.0708343	1	0.221958	2586.54	448.218	7411.8	33103	1695	2253	2370.7	1204.1	3325.9	2881.9
2013	340000	340300	0.0572875	1	0.248622	2562.12	428.621	7411.8	33103	1695	2253	2370.7	1204.1	3325.9	2881.9
2013	340000	340400	0.0585696	1	0.250734	2084.94	411.26	7411.8	33103	1695	2253	2370.7	1204.1	3325.9	2881.9
2013	340000	340500	0.0765213	1	0.233376	2024.88	268.139	7411.8	33103	1695	2253	2370.7	1204.1	3325.9	2881.9
2013	340000	340600	0.057917	1	0.20889	2374.02	337.639	7411.8	33103	1695	2253	2370.7	1204.1	3325.9	2881.9
2013	340000	340700	0.0942252	1	0.252516	2100.78	395.589	7411.8	33103	1695	2253	2370.7	1204.1	3325.9	2881.9
2013	340000	340800	0.0455922	1	0.24255	2277.66	387.69	7411.8	33103	1695	2253	2370.7	1204.1	3325.9	2881.9
2013	340000	341000	0.0892224	1	0.202554	2037.42	282.773	7411.8	33103	1695	2253	2370.7	1204.1	3325.9	2881.9
2013	340000	341100	0.0531849	1	0.261822	2492.82	433.411	7411.8	33103	1695	2253	2370.7	1204.1	3325.9	2881.9
2013	340000	341200	0.0408885	1	0.241428	2355.54	440.08	7411.8	33103	1695	2253	2370.7	1204.1	3325.9	2881.9
2013	340000	341300	0.0333349	1	0.26103	2460.48	432.595	7411.8	33103	1695	2253	2370.7	1204.1	3325.9	2881.9
2013	340000	341500	0.0324016	1	0.223674	2187.9	399.855	7411.8	33103	1695	2253	2370.7	1204.1	3325.9	2881.9
2013	340000	341600	0.0259425	1	0.210012	2120.58	314.953	7411.8	33103	1695	2253	2370.7	1204.1	3325.9	2881.9
2013	340000	341700	0.0556639	1	0.259314	2554.2	437.547	7411.8	33103	1695	2253	2370.7	1204.1	3325.9	2881.9
2013	340000	341800	0.0739988	1	0.254232	2044.02	320.147	7411.8	33103	1695	2253	2370.7	1204.1	3325.9	2881.9
2013	360000	360100	0.137277	1	0.241164	2181.96	411.492	7411.8	33103	1695	2253	2370.7	1204.1	3325.9	2881.9
2013	360000	360200	0.0740515	1	0.258984	2399.1	315.316	7411.8	33103	1695	2253	2370.7	1204.1	3325.9	2881.9
2013	360000	360300	0.0607076	1	0.240438	2261.82	395.306	7411.8	33103	1695	2253	2370.7	1204.1	3325.9	2881.9
2013	360000	360400	0.0554933	1	0.248028	2084.28	286.462	7411.8	33103	1695	2253	2370.7	1204.1	3325.9	2881.9
2013	360000	360500	0.0542472	1	0.208164	2461.14	446.814	7411.8	33103	1695	2253	2370.7	1204.1	3325.9	2881.9
2013	360000	360600	0.0595404	1	0.241824	2128.5	303.295	7411.8	33103	1695	2253	2370.7	1204.1	3325.9	2881.9
2013	360000	360700	0.0486904	1	0.261822	2352.9	364.817	7411.8	33103	1695	2253	2370.7	1204.1	3325.9	2881.9
2013	360000	360800	0.0416399	1	0.24684	2608.32	405.362	7411.8	33103	1695	2253	2370.7	1204.1	3325.9	2881.9
2013	360000	360900	0.0418467	1	0.249348	2063.82	327.199	7411.8	33103	1695	2253	2370.7	1204.1	3325.9	2881.9
2013	360000	361000	0.0420096	1	0.241626	2458.5	452.119	7411.8	33103	1695	2253	2370.7	1204.1	3325.9	2881.9
2013	360000	361100	0.0380903	1	0.255816	2080.98	341.258	7411.8	33103	1695	2253	2370.7	1204.1	3325.9	2881.9
2013	420000	420100	0.183609	1	0.33561	3482.16	678.241	7411.8	33103	1695	2253	2370.7	1204.1	3325.9	2881.9
2013	420000	420200	0.0688928	1	0.332772	3424.08	550.315	7411.8	33103	1695	2253	2370.7	1204.1	3325.9	2881.9
2013	420000	420300	0.0791177	1	0.33165	3928.32	679.145	7411.8	33103	1695	2253	2370.7	1204.1	3325.9	2881.9
2013	420000	420500	0.083784	1	0.33132	3775.2	606.457	7411.8	33103	1695	2253	2370.7	1204.1	3325.9	2881.9
2013	420000	420600	0.0591082	1	0.360558	3613.5	600.453	7411.8	33103	1695	2253	2370.7	1204.1	3325.9	2881.9
2013	420000	420700	0.0775283	1	0.38544	3874.86	776.513	7411.8	33103	1695	2253	2370.7	1204.1	3325.9	2881.9
2013	420000	420800	0.0634513	1	0.363726	3307.92	644.252	7411.8	33103	1695	2253	2370.7	1204.1	3325.9	2881.9
2013	420000	420900	0.0506688	1	0.331188	3354.78	496.247	7411.8	33103	1695	2253	2370.7	1204.1	3325.9	2881.9
2013	420000	421000	0.0568354	1	0.334488	3435.3	594.278	7411.8	33103	1695	2253	2370.7	1204.1	3325.9	2881.9
2013	420000	421100	0.039782	1	0.357918	3678.18	652.622	7411.8	33103	1695	2253	2370.7	1204.1	3325.9	2881.9
2013	420000	421200	0.0537451	1	0.388014	3694.68	599.135	7411.8	33103	1695	2253	2370.7	1204.1	3325.9	2881.9
2013	420000	421300	0.0571557	1	0.353496	3876.18	593.926	7411.8	33103	1695	2253	2370.7	1204.1	3325.9	2881.9
2013	430000	430100	0.143993	1	0.346764	3922.38	627.228	7411.8	33103	1695	2253	2370.7	1204.1	3325.9	2881.9
2013	430000	430200	0.0718293	1	0.347754	3925.02	604.111	7411.8	33103	1695	2253	2370.7	1204.1	3325.9	2881.9
2013	430000	430300	0.0684575	1	0.366168	3923.04	634.458	7411.8	33103	1695	2253	2370.7	1204.1	3325.9	2881.9
2013	430000	430400	0.0426028	1	0.380424	3801.6	616.513	7411.8	33103	1695	2253	2370.7	1204.1	3325.9	2881.9
2013	430000	430500	0.0310467	1	0.342474	3879.48	659.494	7411.8	33103	1695	2253	2370.7	1204.1	3325.9	2881.9
2013	430000	430600	0.054104	1	0.365442	3515.16	485.766	7411.8	33103	1695	2253	2370.7	1204.1	3325.9	2881.9
2013	430000	430700	0.0459507	1	0.351582	3449.82	505.734	7411.8	33103	1695	2253	2370.7	1204.1	3325.9	2881.9
2013	430000	430800	0.0563072	1	0.344586	3742.86	551.75	7411.8	33103	1695	2253	2370.7	1204.1	3325.9	2881.9
2013	430000	430900	0.0403901	1	0.36432	3847.8	625.783	7411.8	33103	1695	2253	2370.7	1204.1	3325.9	2881.9
2013	430000	431000	0.0493481	1	0.395736	3946.8	495.464	7411.8	33103	1695	2253	2370.7	1204.1	3325.9	2881.9
2013	430000	431100	0.0315516	1	0.359832	3409.56	645.323	7411.8	33103	1695	2253	2370.7	1204.1	3325.9	2881.9
2013	430000	431200	0.041334	1	0.361284	3663.66	723.006	7411.8	33103	1695	2253	2370.7	1204.1	3325.9	2881.9
2013	430000	431300	0.0453558	1	0.338976	3714.48	709.833	7411.8	33103	1695	2253	2370.7	1204.1	3325.9	2881.9
2012	310000	310000	0.252482	1	#N/A		#N/A	6532	29624	1394	2225	1954.3	1047.2	3093.4	2391.4
2012	320000	320100	0.197737	1	0.357888	3201.28	612.43	6532	29624	1394	2225	1954.3	1047.2	3093.4	2391.4
2012	320000	320200	0.161905	1	0.37088	3669.12	650.091	6532	29624	1394	2225	1954.3	1047.2	3093.4	2391.4
2012	320000	320300	0.0665059	1	0.330752	3692.16	652.86	6532	29624	1394	2225	1954.3	1047.2	3093.4	2391.4
2012	320000	320400	0.138957	1	0.356544	3456	638.179	6532	29624	1394	2225	1954.3	1047.2	3093.4	2391.4
2012	320000	320500	0.20493	1	0.327616	3699.84	596.528	6532	29624	1394	2225	1954.3	1047.2	3093.4	2391.4
2012	320000	320600	0.0901463	1	0.374784	3527.68	481.308	6532	29624	1394	2225	1954.3	1047.2	3093.4	2391.4
2012	320000	320700	0.0712927	1	0.348736	3736.32	489.546	6532	29624	1394	2225	1954.3	1047.2	3093.4	2391.4
2012	320000	320800	0.0579374	1	0.334528	3541.76	540.111	6532	29624	1394	2225	1954.3	1047.2	3093.4	2391.4
2012	320000	320900	0.0647121	1	0.360832	3221.76	464.637	6532	29624	1394	2225	1954.3	1047.2	3093.4	2391.4
2012	320000	321000	0.0964565	1	0.364928	3662.08	562.785	6532	29624	1394	2225	1954.3	1047.2	3093.4	2391.4
2012	320000	321100	0.10797	1	0.34944	3610.24	562.85	6532	29624	1394	2225	1954.3	1047.2	3093.4	2391.4
2012	320000	321200	0.0835597	1	0.33152	3767.68	573.082	6532	29624	1394	2225	1954.3	1047.2	3093.4	2391.4
2012	320000	321300	0.0535935	1	0.34048	3679.36	559.909	6532	29624	1394	2225	1954.3	1047.2	3093.4	2391.4
2012	330000	330100	0.288656	1	0.375296	3294.08	627.645	7411.8	33103	1695	2253	2370.7	1204.1	3325.9	2881.9
2012	330000	330200	0.184947	1	0.327616	3354.88	473.335	7411.8	33103	1695	2253	2370.7	1204.1	3325.9	2881.9
2012	330000	330300	0.132633	1	0.325312	3580.8	543.546	7411.8	33103	1695	2253	2370.7	1204.1	3325.9	2881.9
2012	330000	330400	0.166974	1	0.33824	3347.2	493.218	7411.8	33103	1695	2253	2370.7	1204.1	3325.9	2881.9
2012	330000	330500	0.123758	1	0.352448	3256.32	444.926	7411.8	33103	1695	2253	2370.7	1204.1	3325.9	2881.9
2012	330000	330600	0.134321	1	0.353088	3754.24	596.779	7411.8	33103	1695	2253	2370.7	1204.1	3325.9	2881.9
2012	330000	330700	0.150805	1	0.35648	3312.64	460.308	7411.8	33103	1695	2253	2370.7	1204.1	3325.9	2881.9
2012	330000	330800	0.0817356	1	0.325824	3436.16	539.553	7411.8	33103	1695	2253	2370.7	1204.1	3325.9	2881.9
2012	330000	330900	0.157903	1	0.347456	3356.16	595.709	7411.8	33103	1695	2253	2370.7	1204.1	3325.9	2881.9
2012	330000	331000	0.120871	1	0.345152	3377.28	630.489	7411.8	33103	1695	2253	2370.7	1204.1	3325.9	2881.9
2012	330000	331100	0.0909684	1	0.34656	3379.84	590.28	7411.8	33103	1695	2253	2370.7	1204.1	3325.9	2881.9
2012	340000	340100	0.096374	1	0.196032	2546.56	416.191	6532	29624	1394	2225	1954.3	1047.2	3093.4	2391.4
2012	340000	340200	0.0712488	1	0.196096	2041.6	399.213	6532	29624	1394	2225	1954.3	1047.2	3093.4	2391.4
2012	340000	340300	0.0541252	1	0.212288	2282.24	408.895	6532	29624	1394	2225	1954.3	1047.2	3093.4	2391.4
2012	340000	340400	0.0668527	1	0.213184	2383.36	311.678	6532	29624	1394	2225	1954.3	1047.2	3093.4	2391.4
2012	340000	340500	0.0755216	1	0.25152	1955.84	399.748	6532	29624	1394	2225	1954.3	1047.2	3093.4	2391.4
2012	340000	340600	0.0579631	1	0.22176	2471.68	412.561	6532	29624	1394	2225	1954.3	1047.2	3093.4	2391.4
2012	340000	340700	0.0967879	1	0.20832	2433.28	420.295	6532	29624	1394	2225	1954.3	1047.2	3093.4	2391.4
2012	340000	340800	0.0485551	1	0.23808	2346.88	314.415	6532	29624	1394	2225	1954.3	1047.2	3093.4	2391.4
2012	340000	341000	0.0909179	1	0.227264	2256	378.95	6532	29624	1394	2225	1954.3	1047.2	3093.4	2391.4
2012	340000	341100	0.0539073	1	0.208896	2558.72	374.504	6532	29624	1394	2225	1954.3	1047.2	3093.4	2391.4
2012	340000	341200	0.0346271	1	0.204992	1946.24	329.013	6532	29624	1394	2225	1954.3	1047.2	3093.4	2391.4
2012	340000	341300	0.0376257	1	0.255296	2156.8	384.852	6532	29624	1394	2225	1954.3	1047.2	3093.4	2391.4
2012	340000	341500	0.037	1	0.20608	2113.92	279	6532	29624	1394	2225	1954.3	1047.2	3093.4	2391.4
2012	340000	341600	0.0311203	1	0.24672	2304.64	318.382	6532	29624	1394	2225	1954.3	1047.2	3093.4	2391.4
2012	340000	341700	0.0587666	1	0.192512	2186.88	319.699	6532	29624	1394	2225	1954.3	1047.2	3093.4	2391.4
2012	340000	341800	0.073548	1	0.225664	1957.76	339.101	6532	29624	1394	2225	1954.3	1047.2	3093.4	2391.4
2012	360000	360100	0.111119	1	0.251904	2049.28	296.17	6532	29624	1394	2225	1954.3	1047.2	3093.4	2391.4
2012	360000	360200	0.0922539	1	0.251968	1996.16	378.042	6532	29624	1394	2225	1954.3	1047.2	3093.4	2391.4
2012	360000	360300	0.063839	1	0.195968	2243.2	352.157	6532	29624	1394	2225	1954.3	1047.2	3093.4	2391.4
2012	360000	360400	0.055925	1	0.243008	1925.76	295.032	6532	29624	1394	2225	1954.3	1047.2	3093.4	2391.4
2012	360000	360500	0.0739533	1	0.206912	2336.64	345.252	6532	29624	1394	2225	1954.3	1047.2	3093.4	2391.4
2012	360000	360600	0.0580456	1	0.232768	2040.96	266.429	6532	29624	1394	2225	1954.3	1047.2	3093.4	2391.4
2012	360000	360700	0.0551748	1	0.225024	2003.2	287.128	6532	29624	1394	2225	1954.3	1047.2	3093.4	2391.4
2012	360000	360800	0.0482395	1	0.226688	2405.12	331.979	6532	29624	1394	2225	1954.3	1047.2	3093.4	2391.4
2012	360000	360900	0.0426784	1	0.217152	1925.12	354.119	6532	29624	1394	2225	1954.3	1047.2	3093.4	2391.4
2012	360000	361000	0.0470983	1	0.22976	1946.88	345.155	6532	29624	1394	2225	1954.3	1047.2	3093.4	2391.4
2012	360000	361100	0.0459213	1	0.241984	2039.04	275.981	6532	29624	1394	2225	1954.3	1047.2	3093.4	2391.4
2012	420000	420100	0.183969	1	0.326848	3446.4	546.154	6532	29624	1394	2225	1954.3	1047.2	3093.4	2391.4
2012	420000	420200	0.0684511	1	0.322752	3603.2	603.137	6532	29624	1394	2225	1954.3	1047.2	3093.4	2391.4
2012	420000	420300	0.0919783	1	0.360512	3820.8	530.039	6532	29624	1394	2225	1954.3	1047.2	3093.4	2391.4
2012	420000	420500	0.0789622	1	0.327424	3378.56	556.955	6532	29624	1394	2225	1954.3	1047.2	3093.4	2391.4
2012	420000	420600	0.0590276	1	0.382784	3504.64	510.182	6532	29624	1394	2225	1954.3	1047.2	3093.4	2391.4
2012	420000	420700	0.0746633	1	0.362752	3649.92	674.097	6532	29624	1394	2225	1954.3	1047.2	3093.4	2391.4
2012	420000	420800	0.0666648	1	0.345088	3593.6	625.961	6532	29624	1394	2225	1954.3	1047.2	3093.4	2391.4
2012	420000	420900	0.0550119	1	0.358976	3301.12	632.924	6532	29624	1394	2225	1954.3	1047.2	3093.4	2391.4
2012	420000	421000	0.0598534	1	0.360064	3243.52	432.526	6532	29624	1394	2225	1954.3	1047.2	3093.4	2391.4
2012	420000	421100	0.0407084	1	0.357248	3299.2	662.599	6532	29624	1394	2225	1954.3	1047.2	3093.4	2391.4
2012	420000	421200	0.0559905	1	0.331776	3212.8	505.366	6532	29624	1394	2225	1954.3	1047.2	3093.4	2391.4
2012	420000	421300	0.0474218	1	0.329216	3443.84	465.743	6532	29624	1394	2225	1954.3	1047.2	3093.4	2391.4
2012	430000	430100	0.140438	1	0.358272	3767.04	604.339	6532	29624	1394	2225	1954.3	1047.2	3093.4	2391.4
2012	430000	430200	0.0768863	1	0.326016	3338.24	566.439	6532	29624	1394	2225	1954.3	1047.2	3093.4	2391.4
2012	430000	430300	0.0697129	1	0.354496	3552.64	580.891	6532	29624	1394	2225	1954.3	1047.2	3093.4	2391.4
2012	430000	430400	0.04556	1	0.33536	3476.48	586	6532	29624	1394	2225	1954.3	1047.2	3093.4	2391.4
2012	430000	430500	0.0368251	1	0.358144	3644.16	536.251	6532	29624	1394	2225	1954.3	1047.2	3093.4	2391.4
2012	430000	430600	0.0602489	1	0.323968	3610.24	511.219	6532	29624	1394	2225	1954.3	1047.2	3093.4	2391.4
2012	430000	430700	0.0541757	1	0.333696	3277.44	423.228	6532	29624	1394	2225	1954.3	1047.2	3093.4	2391.4
2012	430000	430800	0.0660655	1	0.370688	3786.88	555.666	6532	29624	1394	2225	1954.3	1047.2	3093.4	2391.4
2012	430000	430900	0.0463084	1	0.332864	3503.36	538.303	6532	29624	1394	2225	1954.3	1047.2	3093.4	2391.4
2012	430000	431000	0.0532222	1	0.323264	3244.16	631.816	6532	29624	1394	2225	1954.3	1047.2	3093.4	2391.4
2012	430000	431100	0.0385923	1	0.361344	3783.68	677.352	6532	29624	1394	2225	1954.3	1047.2	3093.4	2391.4
2012	430000	431200	0.0483941	1	0.328064	3597.44	579.674	6532	29624	1394	2225	1954.3	1047.2	3093.4	2391.4
2012	430000	431300	0.0518788	1	0.322752	3742.08	728.205	6532	29624	1394	2225	1954.3	1047.2	3093.4	2391.4
2011	310000	310000	0.259323	1	#N/A		#N/A	5360.2	24700	1139.9	2185	1607.2	1000.3	2479.8	1880.1
2011	320000	320100	0.221911	1	0.331762	3573.68	578.816	5360.2	24700	1139.9	2185	1607.2	1000.3	2479.8	1880.1
2011	320000	320200	0.1925	1	0.357182	3495.56	639.14	5360.2	24700	1139.9	2185	1607.2	1000.3	2479.8	1880.1
2011	320000	320300	0.0734208	1	0.362204	3501.76	592.731	5360.2	24700	1139.9	2185	1607.2	1000.3	2479.8	1880.1
2011	320000	320400	0.161081	1	0.325376	3653.04	641.751	5360.2	24700	1139.9	2185	1607.2	1000.3	2479.8	1880.1
2011	320000	320500	0.218219	1	0.344348	3651.18	613.017	5360.2	24700	1139.9	2185	1607.2	1000.3	2479.8	1880.1
2011	320000	320600	0.107827	1	0.345898	3346.76	480.26	5360.2	24700	1139.9	2185	1607.2	1000.3	2479.8	1880.1
2011	320000	320700	0.0793133	1	0.343728	3437.28	551.157	5360.2	24700	1139.9	2185	1607.2	1000.3	2479.8	1880.1
2011	320000	320800	0.0670412	1	0.35123	3472	462.709	5360.2	24700	1139.9	2185	1607.2	1000.3	2479.8	1880.1
2011	320000	320900	0.0770057	1	0.340752	3705.74	465.952	5360.2	24700	1139.9	2185	1607.2	1000.3	2479.8	1880.1
2011	320000	321000	0.117395	1	0.310248	3135.96	596.66	5360.2	24700	1139.9	2185	1607.2	1000.3	2479.8	1880.1
2011	320000	321100	0.119395	1	0.367536	3220.28	464.149	5360.2	24700	1139.9	2185	1607.2	1000.3	2479.8	1880.1
2011	320000	321200	0.0875992	1	0.366048	3186.8	459.317	5360.2	24700	1139.9	2185	1607.2	1000.3	2479.8	1880.1
2011	320000	321300	0.0579297	1	0.315704	3487.5	476.976	5360.2	24700	1139.9	2185	1607.2	1000.3	2479.8	1880.1
2011	330000	330100	0.289813	1	0.362762	3505.48	541.678	6532	29624	1394	2225	1954.3	1047.2	3093.4	2391.4
2011	330000	330200	0.206872	1	0.346642	3677.84	722.165	6532	29624	1394	2225	1954.3	1047.2	3093.4	2391.4
2011	330000	330300	0.14646	1	0.316014	3438.52	486.154	6532	29624	1394	2225	1954.3	1047.2	3093.4	2391.4
2011	330000	330400	0.181603	1	0.34875	3293.44	585.153	6532	29624	1394	2225	1954.3	1047.2	3093.4	2391.4
2011	330000	330500	0.135765	1	0.370202	3400.08	576.861	6532	29624	1394	2225	1954.3	1047.2	3093.4	2391.4
2011	330000	330600	0.144683	1	0.34658	3333.12	576.63	6532	29624	1394	2225	1954.3	1047.2	3093.4	2391.4
2011	330000	330700	0.157348	1	0.313348	3504.86	513.108	6532	29624	1394	2225	1954.3	1047.2	3093.4	2391.4
2011	330000	330800	0.107986	1	0.364808	3294.06	654.99	6532	29624	1394	2225	1954.3	1047.2	3093.4	2391.4
2011	330000	330900	0.174154	1	0.3472	3322.58	596.653	6532	29624	1394	2225	1954.3	1047.2	3093.4	2391.4
2011	330000	331000	0.135263	1	0.340876	3339.32	642.191	6532	29624	1394	2225	1954.3	1047.2	3093.4	2391.4
2011	330000	331100	0.10953	1	0.350362	3261.82	485.988	6532	29624	1394	2225	1954.3	1047.2	3093.4	2391.4
2011	340000	340100	0.108349	1	0.246698	2470.08	372.949	5360.2	24700	1139.9	2185	1607.2	1000.3	2479.8	1880.1
2011	340000	340200	0.0727595	1	0.226548	1891	330.431	5360.2	24700	1139.9	2185	1607.2	1000.3	2479.8	1880.1
2011	340000	340300	0.0855619	1	0.200508	2057.78	367.296	5360.2	24700	1139.9	2185	1607.2	1000.3	2479.8	1880.1
2011	340000	340400	0.0662483	1	0.209436	2401.26	315.296	5360.2	24700	1139.9	2185	1607.2	1000.3	2479.8	1880.1
2011	340000	340500	0.076763	1	0.197966	2091.26	365.226	5360.2	24700	1139.9	2185	1607.2	1000.3	2479.8	1880.1
2011	340000	340600	0.0596959	1	0.216628	2412.42	362.595	5360.2	24700	1139.9	2185	1607.2	1000.3	2479.8	1880.1
2011	340000	340700	0.0955918	1	0.187426	2032.98	321.124	5360.2	24700	1139.9	2185	1607.2	1000.3	2479.8	1880.1
2011	340000	340800	0.0497108	1	0.201872	2193.56	308.405	5360.2	24700	1139.9	2185	1607.2	1000.3	2479.8	1880.1
2011	340000	341000	0.0994897	1	0.230392	1912.7	319.221	5360.2	24700	1139.9	2185	1607.2	1000.3	2479.8	1880.1
2011	340000	341100	0.0531351	1	0.246326	2038.56	328.435	5360.2	24700	1139.9	2185	1607.2	1000.3	2479.8	1880.1
2011	340000	341200	0.0320598	1	0.234732	2041.04	288.025	5360.2	24700	1139.9	2185	1607.2	1000.3	2479.8	1880.1
2011	340000	341300	0.0359037	1	0.220286	1985.86	374.056	5360.2	24700	1139.9	2185	1607.2	1000.3	2479.8	1880.1
2011	340000	341500	0.034114	1	0.216876	1860	278.821	5360.2	24700	1139.9	2185	1607.2	1000.3	2479.8	1880.1
2011	340000	341600	0.0264194	1	0.19406	2393.82	458.386	5360.2	24700	1139.9	2185	1607.2	1000.3	2479.8	1880.1
2011	340000	341700	0.0651608	1	0.246822	2370.26	404.762	5360.2	24700	1139.9	2185	1607.2	1000.3	2479.8	1880.1
2011	340000	341800	0.0818973	1	0.208196	1928.2	350.127	5360.2	24700	1139.9	2185	1607.2	1000.3	2479.8	1880.1
2011	360000	360100	0.108501	1	0.231756	2108.62	326.31	5360.2	24700	1139.9	2185	1607.2	1000.3	2479.8	1880.1
2011	360000	360200	0.0716695	1	0.243164	2063.36	386.653	5360.2	24700	1139.9	2185	1607.2	1000.3	2479.8	1880.1
2011	360000	360300	0.0698648	1	0.238142	2243.78	278.879	5360.2	24700	1139.9	2185	1607.2	1000.3	2479.8	1880.1
2011	360000	360400	0.063218	1	0.2449	2069.56	306.927	5360.2	24700	1139.9	2185	1607.2	1000.3	2479.8	1880.1
2011	360000	360500	0.0692122	1	0.225432	2138.38	298.546	5360.2	24700	1139.9	2185	1607.2	1000.3	2479.8	1880.1
2011	360000	360600	0.0584896	1	0.241366	2128.46	328.362	5360.2	24700	1139.9	2185	1607.2	1000.3	2479.8	1880.1
2011	360000	360700	0.0539045	1	0.19902	2427.3	438.014	5360.2	24700	1139.9	2185	1607.2	1000.3	2479.8	1880.1
2011	360000	360800	0.0456915	1	0.24087	2409.32	358.488	5360.2	24700	1139.9	2185	1607.2	1000.3	2479.8	1880.1
2011	360000	360900	0.0406117	1	0.211606	2001.36	330.549	5360.2	24700	1139.9	2185	1607.2	1000.3	2479.8	1880.1
2011	360000	361000	0.0448639	1	0.191146	2283.46	334.61	5360.2	24700	1139.9	2185	1607.2	1000.3	2479.8	1880.1
2011	360000	361100	0.0415095	1	0.23684	2152.64	404.504	5360.2	24700	1139.9	2185	1607.2	1000.3	2479.8	1880.1
2011	420000	420100	0.180767	1	0.316696	3272.98	550.242	5360.2	24700	1139.9	2185	1607.2	1000.3	2479.8	1880.1
2011	420000	420200	0.0711828	1	0.332568	3391.4	702.409	5360.2	24700	1139.9	2185	1607.2	1000.3	2479.8	1880.1
2011	420000	420300	0.0818054	1	0.317254	3294.06	515.815	5360.2	24700	1139.9	2185	1607.2	1000.3	2479.8	1880.1
2011	420000	420500	0.0921951	1	0.364064	3226.48	504.504	5360.2	24700	1139.9	2185	1607.2	1000.3	2479.8	1880.1
2011	420000	420600	0.0584189	1	0.311302	3261.2	465.051	5360.2	24700	1139.9	2185	1607.2	1000.3	2479.8	1880.1
2011	420000	420700	0.0717929	1	0.35247	3254.38	454.778	5360.2	24700	1139.9	2185	1607.2	1000.3	2479.8	1880.1
2011	420000	420800	0.0663311	1	0.33821	3540.2	430.128	5360.2	24700	1139.9	2185	1607.2	1000.3	2479.8	1880.1
2011	420000	420900	0.0515534	1	0.356066	3678.46	673.823	5360.2	24700	1139.9	2185	1607.2	1000.3	2479.8	1880.1
2011	420000	421000	0.0564024	1	0.32643	3387.68	455.967	5360.2	24700	1139.9	2185	1607.2	1000.3	2479.8	1880.1
2011	420000	421100	0.0394601	1	0.363692	3364.12	488.657	5360.2	24700	1139.9	2185	1607.2	1000.3	2479.8	1880.1
2011	420000	421200	0.06275	1	0.324074	3163.24	598.683	5360.2	24700	1139.9	2185	1607.2	1000.3	2479.8	1880.1
2011	420000	421300	0.0459702	1	0.371504	3152.7	523.58	5360.2	24700	1139.9	2185	1607.2	1000.3	2479.8	1880.1
2011	430000	430100	0.155793	1	0.34379	3351.1	511.01	5360.2	24700	1139.9	2185	1607.2	1000.3	2479.8	1880.1
2011	430000	430200	0.0774966	1	0.358856	3563.14	544.397	5360.2	24700	1139.9	2185	1607.2	1000.3	2479.8	1880.1
2011	430000	430300	0.0899667	1	0.339822	3186.18	555.822	5360.2	24700	1139.9	2185	1607.2	1000.3	2479.8	1880.1
2011	430000	430400	0.0563202	1	0.347324	3515.4	498.411	5360.2	24700	1139.9	2185	1607.2	1000.3	2479.8	1880.1
2011	430000	430500	0.0393208	1	0.312542	3538.34	683.587	5360.2	24700	1139.9	2185	1607.2	1000.3	2479.8	1880.1
2011	430000	430600	0.0593123	1	0.339202	3189.9	423.227	5360.2	24700	1139.9	2185	1607.2	1000.3	2479.8	1880.1
2011	430000	430700	0.0536193	1	0.343294	3625.14	653.774	5360.2	24700	1139.9	2185	1607.2	1000.3	2479.8	1880.1
2011	430000	430800	0.0657372	1	0.331762	3671.64	644.363	5360.2	24700	1139.9	2185	1607.2	1000.3	2479.8	1880.1
2011	430000	430900	0.044367	1	0.326306	3629.48	560.286	5360.2	24700	1139.9	2185	1607.2	1000.3	2479.8	1880.1
2011	430000	431000	0.0546395	1	0.37014	3245.7	560.889	5360.2	24700	1139.9	2185	1607.2	1000.3	2479.8	1880.1
2011	430000	431100	0.0322327	1	0.355446	3258.72	528.318	5360.2	24700	1139.9	2185	1607.2	1000.3	2479.8	1880.1
2011	430000	431200	0.0397026	1	0.338148	3605.3	607.641	5360.2	24700	1139.9	2185	1607.2	1000.3	2479.8	1880.1
2011	430000	431300	0.04349	1	0.31248	3321.96	559.34	5360.2	24700	1139.9	2185	1607.2	1000.3	2479.8	1880.1
2010	310000	310000	0.121108	1	#N/A		#N/A	4237	19755	883.6	2159	1275.1	704.9	1846	1686.1
2010	320000	320100	0.0258417	1	0.33756	3241.2	435.055	4237	19755	883.6	2159	1275.1	704.9	1846	1686.1
2010	320000	320200	0.0233258	1	0.34218	3096.6	548.38	4237	19755	883.6	2159	1275.1	704.9	1846	1686.1
2010	320000	320300	0.00671378	1	0.33378	3436.2	481.113	4237	19755	883.6	2159	1275.1	704.9	1846	1686.1
2010	320000	320400	0.0177974	1	0.3504	3511.2	526.077	4237	19755	883.6	2159	1275.1	704.9	1846	1686.1
2010	320000	320500	0.0275259	1	0.34416	3247.8	609.483	4237	19755	883.6	2159	1275.1	704.9	1846	1686.1
2010	320000	320600	0.00949445	1	0.30348	3501	573.549	4237	19755	883.6	2159	1275.1	704.9	1846	1686.1
2010	320000	320700	0.00766151	1	0.3369	3191.4	402.14	4237	19755	883.6	2159	1275.1	704.9	1846	1686.1
2010	320000	320800	0.0052817	1	0.3525	3345	508.1	4237	19755	883.6	2159	1275.1	704.9	1846	1686.1
2010	320000	320900	0.0051017	1	0.33024	3389.4	547.295	4237	19755	883.6	2159	1275.1	704.9	1846	1686.1
2010	320000	321000	0.0119568	1	0.30006	3043.2	529.85	4237	19755	883.6	2159	1275.1	704.9	1846	1686.1
2010	320000	321100	0.0124366	1	0.31188	3397.8	679.664	4237	19755	883.6	2159	1275.1	704.9	1846	1686.1
2010	320000	321200	0.00906765	1	0.3183	3025.2	459.942	4237	19755	883.6	2159	1275.1	704.9	1846	1686.1
2010	320000	321300	0.00523197	1	0.33888	3486.6	609.67	4237	19755	883.6	2159	1275.1	704.9	1846	1686.1
2010	330000	330100	0.0438983	1	0.34038	3005.4	553.452	5360.2	24700	1139.9	2185	1607.2	1000.3	2479.8	1880.1
2010	330000	330200	0.0284079	1	0.34722	3235.2	571.55	5360.2	24700	1139.9	2185	1607.2	1000.3	2479.8	1880.1
2010	330000	330300	0.0158738	1	0.34968	3364.8	438.418	5360.2	24700	1139.9	2185	1607.2	1000.3	2479.8	1880.1
2010	330000	330400	0.0204812	1	0.31872	3330	557.913	5360.2	24700	1139.9	2185	1607.2	1000.3	2479.8	1880.1
2010	330000	330500	0.014567	1	0.32256	3230.4	560.202	5360.2	24700	1139.9	2185	1607.2	1000.3	2479.8	1880.1
2010	330000	330600	0.0147409	1	0.30876	3304.2	519.1	5360.2	24700	1139.9	2185	1607.2	1000.3	2479.8	1880.1
2010	330000	330700	0.0180876	1	0.34608	3516.6	538.632	5360.2	24700	1139.9	2185	1607.2	1000.3	2479.8	1880.1
2010	330000	330800	0.010406	1	0.32472	3251.4	478.555	5360.2	24700	1139.9	2185	1607.2	1000.3	2479.8	1880.1
2010	330000	330900	0.0212489	1	0.30816	3313.8	444.41	5360.2	24700	1139.9	2185	1607.2	1000.3	2479.8	1880.1
2010	330000	331000	0.0143072	1	0.35172	3181.2	541.482	5360.2	24700	1139.9	2185	1607.2	1000.3	2479.8	1880.1
2010	330000	331100	0.0107625	1	0.33438	3333	553.717	5360.2	24700	1139.9	2185	1607.2	1000.3	2479.8	1880.1
2010	340000	340100	0.0135722	1	0.21228	2245.2	410.125	4237	19755	883.6	2159	1275.1	704.9	1846	1686.1
2010	340000	340181	0.00429529	1	#N/A	#N/A	#N/A	4237	19755	883.6	2159	1275.1	704.9	1846	1686.1
2010	340000	340200	0.0126931	1	0.20052	1829.4	258.172	4237	19755	883.6	2159	1275.1	704.9	1846	1686.1
2010	340000	340300	0.00526603	1	0.19626	2178	366.131	4237	19755	883.6	2159	1275.1	704.9	1846	1686.1
2010	340000	340400	0.00592777	1	0.2238	1804.2	230.624	4237	19755	883.6	2159	1275.1	704.9	1846	1686.1
2010	340000	340500	0.0101584	1	0.19482	2353.2	349.362	4237	19755	883.6	2159	1275.1	704.9	1846	1686.1
2010	340000	340600	0.0058299	1	0.1806	2142.6	373.581	4237	19755	883.6	2159	1275.1	704.9	1846	1686.1
2010	340000	340700	0.0105169	1	0.19884	2041.2	309.84	4237	19755	883.6	2159	1275.1	704.9	1846	1686.1
2010	340000	340800	0.00419374	1	0.21588	1920.6	276.082	4237	19755	883.6	2159	1275.1	704.9	1846	1686.1
2010	340000	341000	0.0110325	1	0.20658	2051.4	328.336	4237	19755	883.6	2159	1275.1	704.9	1846	1686.1
2010	340000	341100	0.00435837	1	0.22242	2115	345.975	4237	19755	883.6	2159	1275.1	704.9	1846	1686.1
2010	340000	341200	0.00265356	1	0.18252	2161.2	304.1	4237	19755	883.6	2159	1275.1	704.9	1846	1686.1
2010	340000	341300	0.00313041	1	0.21162	2367	363.353	4237	19755	883.6	2159	1275.1	704.9	1846	1686.1
2010	340000	341500	0.0045543	1	0.18534	2342.4	357.807	4237	19755	883.6	2159	1275.1	704.9	1846	1686.1
2010	340000	341600	0.00283245	1	0.18984	1905	308.897	4237	19755	883.6	2159	1275.1	704.9	1846	1686.1
2010	340000	341700	0.00548258	1	0.21498	2399.4	398.576	4237	19755	883.6	2159	1275.1	704.9	1846	1686.1
2010	340000	341800	0.00696213	1	0.1947	2215.8	374.894	4237	19755	883.6	2159	1275.1	704.9	1846	1686.1
2010	360000	360100	0.0133177	1	0.19134	1811.4	337.417	4237	19755	883.6	2159	1275.1	704.9	1846	1686.1
2010	360000	360200	0.00580155	1	0.19488	2005.8	375.36	4237	19755	883.6	2159	1275.1	704.9	1846	1686.1
2010	360000	360300	0.00818286	1	0.1845	1938	359.385	4237	19755	883.6	2159	1275.1	704.9	1846	1686.1
2010	360000	360400	0.00554434	1	0.22314	2050.2	282.617	4237	19755	883.6	2159	1275.1	704.9	1846	1686.1
2010	360000	360500	0.00796122	1	0.18564	1870.8	290.909	4237	19755	883.6	2159	1275.1	704.9	1846	1686.1
2010	360000	360600	0.00522093	1	0.23454	1934.4	355.097	4237	19755	883.6	2159	1275.1	704.9	1846	1686.1
2010	360000	360700	0.00437623	1	0.18522	2184	386.72	4237	19755	883.6	2159	1275.1	704.9	1846	1686.1
2010	360000	360800	0.00510742	1	0.23508	1837.2	253.795	4237	19755	883.6	2159	1275.1	704.9	1846	1686.1
2010	360000	360900	0.00437905	1	0.22338	2389.8	491.8	4237	19755	883.6	2159	1275.1	704.9	1846	1686.1
2010	360000	361000	0.00450276	1	0.2289	2070.6	315.681	4237	19755	883.6	2159	1275.1	704.9	1846	1686.1
2010	360000	361100	0.00381747	1	0.19518	2374.2	371.096	4237	19755	883.6	2159	1275.1	704.9	1846	1686.1
2010	420000	420100	0.0223746	1	0.31686	3093.6	486.905	4237	19755	883.6	2159	1275.1	704.9	1846	1686.1
2010	420000	420200	0.0071146	1	0.3168	3493.2	482.551	4237	19755	883.6	2159	1275.1	704.9	1846	1686.1
2010	420000	420300	0.0110538	1	0.34926	3520.8	716.501	4237	19755	883.6	2159	1275.1	704.9	1846	1686.1
2010	420000	420500	0.00990081	1	0.31824	3163.2	609.497	4237	19755	883.6	2159	1275.1	704.9	1846	1686.1
2010	420000	420600	0.00511219	1	0.35706	3339	584.39	4237	19755	883.6	2159	1275.1	704.9	1846	1686.1
2010	420000	420700	0.0100673	1	0.35034	3192.6	535.262	4237	19755	883.6	2159	1275.1	704.9	1846	1686.1
2010	420000	420800	0.0080069	1	0.30096	3099	428.579	4237	19755	883.6	2159	1275.1	704.9	1846	1686.1
2010	420000	420900	0.00515857	1	0.3369	3001.2	482.882	4237	19755	883.6	2159	1275.1	704.9	1846	1686.1
2010	420000	421000	0.00477614	1	0.3342	3439.2	586.17	4237	19755	883.6	2159	1275.1	704.9	1846	1686.1
2010	420000	421100	0.00355668	1	0.35418	3326.4	504.645	4237	19755	883.6	2159	1275.1	704.9	1846	1686.1
2010	420000	421200	0.0064164	1	0.3066	3457.2	502.992	4237	19755	883.6	2159	1275.1	704.9	1846	1686.1
2010	420000	421300	0.00431993	1	0.35376	3285.6	494.414	4237	19755	883.6	2159	1275.1	704.9	1846	1686.1
2010	430000	430100	0.0184223	1	0.31302	3104.4	510.255	4237	19755	883.6	2159	1275.1	704.9	1846	1686.1
2010	430000	430200	0.00840798	1	0.33456	3126.6	490.794	4237	19755	883.6	2159	1275.1	704.9	1846	1686.1
2010	430000	430300	0.00909354	1	0.35286	3057.6	494.441	4237	19755	883.6	2159	1275.1	704.9	1846	1686.1
2010	430000	430400	0.0061116	1	0.30624	3401.4	607.261	4237	19755	883.6	2159	1275.1	704.9	1846	1686.1
2010	430000	430500	0.00344155	1	0.31074	3519	603.334	4237	19755	883.6	2159	1275.1	704.9	1846	1686.1
2010	430000	430600	0.0059291	1	0.31476	3149.4	450.729	4237	19755	883.6	2159	1275.1	704.9	1846	1686.1
2010	430000	430700	0.0045493	1	0.34644	3223.2	510.174	4237	19755	883.6	2159	1275.1	704.9	1846	1686.1
2010	430000	430800	0.00995314	1	0.30342	3378.6	440.488	4237	19755	883.6	2159	1275.1	704.9	1846	1686.1
2010	430000	430900	0.00409653	1	0.30876	3448.2	500.302	4237	19755	883.6	2159	1275.1	704.9	1846	1686.1
2010	430000	431000	0.00519255	1	0.35334	3567	509.899	4237	19755	883.6	2159	1275.1	704.9	1846	1686.1
2010	430000	431100	0.00367552	1	0.31236	3105	539.656	4237	19755	883.6	2159	1275.1	704.9	1846	1686.1
2010	430000	431200	0.0049616	1	0.31458	3374.4	433.231	4237	19755	883.6	2159	1275.1	704.9	1846	1686.1
2010	430000	431300	0.00422055	1	0.35238	3236.4	599.685	4237	19755	883.6	2159	1275.1	704.9	1846	1686.1
2009	310000	310000	0.089604	1	#N/A		#N/A	4142.5	19605	822.6	2131	1166.5	646.9	1991.8	1503.8
2009	320000	320100	0.0294403	1	0.338894	3260.18	589.369	4142.5	19605	822.6	2131	1166.5	646.9	1991.8	1503.8
2009	320000	320200	0.031256	1	0.32335	3423.16	694.999	4142.5	19605	822.6	2131	1166.5	646.9	1991.8	1503.8
2009	320000	320300	0.00901064	1	0.334834	3029.34	459.885	4142.5	19605	822.6	2131	1166.5	646.9	1991.8	1503.8
2009	320000	320400	0.0265167	1	0.333094	2932.48	400.678	4142.5	19605	822.6	2131	1166.5	646.9	1991.8	1503.8
2009	320000	320500	0.0384657	1	0.325786	3074.58	463.826	4142.5	19605	822.6	2131	1166.5	646.9	1991.8	1503.8
2009	320000	320600	0.0120723	1	0.333616	2948.72	411.197	4142.5	19605	822.6	2131	1166.5	646.9	1991.8	1503.8
2009	320000	320700	0.0130057	1	0.295394	3276.42	562.698	4142.5	19605	822.6	2131	1166.5	646.9	1991.8	1503.8
2009	320000	320800	0.00670979	1	0.29812	2908.12	434.16	4142.5	19605	822.6	2131	1166.5	646.9	1991.8	1503.8
2009	320000	320900	0.00743075	1	0.291392	3337.9	521.858	4142.5	19605	822.6	2131	1166.5	646.9	1991.8	1503.8
2009	320000	321000	0.016086	1	0.337154	3318.76	605.718	4142.5	19605	822.6	2131	1166.5	646.9	1991.8	1503.8
2009	320000	321100	0.0170869	1	0.346144	3367.48	493.723	4142.5	19605	822.6	2131	1166.5	646.9	1991.8	1503.8
2009	320000	321200	0.0119334	1	0.29899	2990.48	526.116	4142.5	19605	822.6	2131	1166.5	646.9	1991.8	1503.8
2009	320000	321300	0.00602477	1	0.295742	3426.06	510.184	4142.5	19605	822.6	2131	1166.5	646.9	1991.8	1503.8
2009	330000	330100	0.0504706	1	0.300324	3306	644.377	4237	19755	883.6	2159	1275.1	704.9	1846	1686.1
2009	330000	330200	0.037789	1	0.328396	3039.78	527.32	4237	19755	883.6	2159	1275.1	704.9	1846	1686.1
2009	330000	330300	0.0432705	1	0.341794	2971.92	377.962	4237	19755	883.6	2159	1275.1	704.9	1846	1686.1
2009	330000	330400	0.0269352	1	0.343012	3119.24	572.22	4237	19755	883.6	2159	1275.1	704.9	1846	1686.1
2009	330000	330500	0.0193051	1	0.329092	3467.24	457.716	4237	19755	883.6	2159	1275.1	704.9	1846	1686.1
2009	330000	330600	0.0200951	1	0.29203	3470.14	567.602	4237	19755	883.6	2159	1275.1	704.9	1846	1686.1
2009	330000	330700	0.0226209	1	0.317434	2909.28	446.786	4237	19755	883.6	2159	1275.1	704.9	1846	1686.1
2009	330000	330800	0.0122996	1	0.329324	3097.78	432.089	4237	19755	883.6	2159	1275.1	704.9	1846	1686.1
2009	330000	330900	0.02761	1	0.290174	3232.92	503.852	4237	19755	883.6	2159	1275.1	704.9	1846	1686.1
2009	330000	331000	0.0185597	1	0.315346	2961.48	453.083	4237	19755	883.6	2159	1275.1	704.9	1846	1686.1
2009	330000	331100	0.0138863	1	0.307574	3320.5	585.664	4237	19755	883.6	2159	1275.1	704.9	1846	1686.1
2009	340000	340100	0.0189778	1	0.196794	1872.24	290.889	4142.5	19605	822.6	2131	1166.5	646.9	1991.8	1503.8
2009	340000	340181	0.00554023	1	#N/A	#N/A	#N/A	4142.5	19605	822.6	2131	1166.5	646.9	1991.8	1503.8
2009	340000	340200	0.0156263	1	0.200332	1865.86	369.163	4142.5	19605	822.6	2131	1166.5	646.9	1991.8	1503.8
2009	340000	340300	0.00879934	1	0.176726	2274.18	417.374	4142.5	19605	822.6	2131	1166.5	646.9	1991.8	1503.8
2009	340000	340400	0.00761915	1	0.218776	1835.7	336.706	4142.5	19605	822.6	2131	1166.5	646.9	1991.8	1503.8
2009	340000	340500	0.0121391	1	0.175566	2139.04	436.062	4142.5	19605	822.6	2131	1166.5	646.9	1991.8	1503.8
2009	340000	340600	0.00668393	1	0.216224	2162.24	320.994	4142.5	19605	822.6	2131	1166.5	646.9	1991.8	1503.8
2009	340000	340700	0.01597	1	0.227766	2239.38	360.603	4142.5	19605	822.6	2131	1166.5	646.9	1991.8	1503.8
2009	340000	340800	0.00600534	1	0.207582	2163.4	405.451	4142.5	19605	822.6	2131	1166.5	646.9	1991.8	1503.8
2009	340000	341000	0.0125591	1	0.22098	2253.88	416.03	4142.5	19605	822.6	2131	1166.5	646.9	1991.8	1503.8
2009	340000	341100	0.00512262	1	0.196272	1748.7	310.651	4142.5	19605	822.6	2131	1166.5	646.9	1991.8	1503.8
2009	340000	341200	0.00278459	1	0.203406	2147.74	341.604	4142.5	19605	822.6	2131	1166.5	646.9	1991.8	1503.8
2009	340000	341300	0.00379914	1	0.208336	2210.96	310.467	4142.5	19605	822.6	2131	1166.5	646.9	1991.8	1503.8
2009	340000	341500	0.00421435	1	0.22156	1880.36	262.047	4142.5	19605	822.6	2131	1166.5	646.9	1991.8	1503.8
2009	340000	341600	0.00355488	1	0.210134	2199.94	420.414	4142.5	19605	822.6	2131	1166.5	646.9	1991.8	1503.8
2009	340000	341700	0.0061117	1	0.192734	1946.48	346.013	4142.5	19605	822.6	2131	1166.5	646.9	1991.8	1503.8
2009	340000	341800	0.00706321	1	0.21692	2250.98	334.477	4142.5	19605	822.6	2131	1166.5	646.9	1991.8	1503.8
2009	360000	360100	0.0208603	1	0.218196	2003.32	264.825	4142.5	19605	822.6	2131	1166.5	646.9	1991.8	1503.8
2009	360000	360200	0.00869181	1	0.183628	2007.38	253.429	4142.5	19605	822.6	2131	1166.5	646.9	1991.8	1503.8
2009	360000	360300	0.0127358	1	0.196098	2041.02	260.679	4142.5	19605	822.6	2131	1166.5	646.9	1991.8	1503.8
2009	360000	360400	0.00771039	1	0.203928	2284.62	376.593	4142.5	19605	822.6	2131	1166.5	646.9	1991.8	1503.8
2009	360000	360500	0.0110271	1	0.20271	1969.68	325.358	4142.5	19605	822.6	2131	1166.5	646.9	1991.8	1503.8
2009	360000	360600	0.0069803	1	0.20822	2135.56	346.052	4142.5	19605	822.6	2131	1166.5	646.9	1991.8	1503.8
2009	360000	360700	0.00617733	1	0.185252	2082.2	363.698	4142.5	19605	822.6	2131	1166.5	646.9	1991.8	1503.8
2009	360000	360800	0.00691993	1	0.180554	2307.24	383.733	4142.5	19605	822.6	2131	1166.5	646.9	1991.8	1503.8
2009	360000	360900	0.00698329	1	0.195924	2313.04	307.788	4142.5	19605	822.6	2131	1166.5	646.9	1991.8	1503.8
2009	360000	361000	0.00659024	1	0.179626	1766.68	238.639	4142.5	19605	822.6	2131	1166.5	646.9	1991.8	1503.8
2009	360000	361100	0.00644707	1	0.200216	1802.06	249.586	4142.5	19605	822.6	2131	1166.5	646.9	1991.8	1503.8
2009	420000	420100	0.0291118	1	0.33872	3248.58	515.274	4142.5	19605	822.6	2131	1166.5	646.9	1991.8	1503.8
2009	420000	420200	0.0120354	1	0.318246	2927.26	497.47	4142.5	19605	822.6	2131	1166.5	646.9	1991.8	1503.8
2009	420000	420300	0.0128767	1	0.341678	3035.14	460.421	4142.5	19605	822.6	2131	1166.5	646.9	1991.8	1503.8
2009	420000	420500	0.0115856	1	0.318362	3154.04	458.037	4142.5	19605	822.6	2131	1166.5	646.9	1991.8	1503.8
2009	420000	420600	0.00714784	1	0.324568	2964.96	426.756	4142.5	19605	822.6	2131	1166.5	646.9	1991.8	1503.8
2009	420000	420700	0.0105007	1	0.343302	3165.64	633.669	4142.5	19605	822.6	2131	1166.5	646.9	1991.8	1503.8
2009	420000	420800	0.00736443	1	0.31262	3185.94	566.385	4142.5	19605	822.6	2131	1166.5	646.9	1991.8	1503.8
2009	420000	420900	0.00637528	1	0.330252	3381.4	426.512	4142.5	19605	822.6	2131	1166.5	646.9	1991.8	1503.8
2009	420000	421000	0.00673785	1	0.342432	3474.2	536.698	4142.5	19605	822.6	2131	1166.5	646.9	1991.8	1503.8
2009	420000	421100	0.00532074	1	0.31204	3402.86	561.12	4142.5	19605	822.6	2131	1166.5	646.9	1991.8	1503.8
2009	420000	421200	0.00581154	1	0.345738	2930.74	485.24	4142.5	19605	822.6	2131	1166.5	646.9	1991.8	1503.8
2009	420000	421300	0.00598852	1	0.300846	3085.02	547.524	4142.5	19605	822.6	2131	1166.5	646.9	1991.8	1503.8
2009	430000	430100	0.0243151	1	0.300846	3460.28	497.256	4142.5	19605	822.6	2131	1166.5	646.9	1991.8	1503.8
2009	430000	430200	0.0130667	1	0.3103	3148.24	462.826	4142.5	19605	822.6	2131	1166.5	646.9	1991.8	1503.8
2009	430000	430300	0.0118799	1	0.290986	2956.84	504.034	4142.5	19605	822.6	2131	1166.5	646.9	1991.8	1503.8
2009	430000	430400	0.0078749	1	0.29435	3368.06	506.912	4142.5	19605	822.6	2131	1166.5	646.9	1991.8	1503.8
2009	430000	430500	0.00431204	1	0.304326	3335	629.024	4142.5	19605	822.6	2131	1166.5	646.9	1991.8	1503.8
2009	430000	430600	0.00743167	1	0.313606	3195.22	445.076	4142.5	19605	822.6	2131	1166.5	646.9	1991.8	1503.8
2009	430000	430700	0.00637805	1	0.320798	3047.32	606.19	4142.5	19605	822.6	2131	1166.5	646.9	1991.8	1503.8
2009	430000	430800	0.0117745	1	0.294698	2928.42	550.376	4142.5	19605	822.6	2131	1166.5	646.9	1991.8	1503.8
2009	430000	430900	0.00499506	1	0.30914	3335	600.177	4142.5	19605	822.6	2131	1166.5	646.9	1991.8	1503.8
2009	430000	431000	0.00695233	1	0.327584	3163.32	490.181	4142.5	19605	822.6	2131	1166.5	646.9	1991.8	1503.8
2009	430000	431100	0.00593564	1	0.324336	3383.14	511.871	4142.5	19605	822.6	2131	1166.5	646.9	1991.8	1503.8
2009	430000	431200	0.00554219	1	0.293248	3136.06	462.523	4142.5	19605	822.6	2131	1166.5	646.9	1991.8	1503.8
2009	430000	431300	0.00816688	1	0.327178	3392.42	481.35	4142.5	19605	822.6	2131	1166.5	646.9	1991.8	1503.8
2008	310000	310000	0.0961095	1	#N/A		#N/A	3500	16887	705.8	2095	1001.3	593.3	1588.5	1318.3
2008	320000	320100	0.0277455	1	0.333536	3303.44	616.36	3500	16887	705.8	2095	1001.3	593.3	1588.5	1318.3
2008	320000	320200	0.0311565	1	0.287	2857.12	491.558	3500	16887	705.8	2095	1001.3	593.3	1588.5	1318.3
2008	320000	320300	0.00824181	1	0.281512	3189.76	577.004	3500	16887	705.8	2095	1001.3	593.3	1588.5	1318.3
2008	320000	320400	0.0239043	1	0.283416	3353.84	613.859	3500	16887	705.8	2095	1001.3	593.3	1588.5	1318.3
2008	320000	320500	0.0381794	1	0.287168	3073.28	445.026	3500	16887	705.8	2095	1001.3	593.3	1588.5	1318.3
2008	320000	320600	0.0113265	1	0.334264	3051.44	471.583	3500	16887	705.8	2095	1001.3	593.3	1588.5	1318.3
2008	320000	320700	0.00908086	1	0.303016	3041.92	471.675	3500	16887	705.8	2095	1001.3	593.3	1588.5	1318.3
2008	320000	320800	0.00714489	1	0.299936	2872.8	453.344	3500	16887	705.8	2095	1001.3	593.3	1588.5	1318.3
2008	320000	320900	0.00684875	1	0.335888	3266.48	599.028	3500	16887	705.8	2095	1001.3	593.3	1588.5	1318.3
2008	320000	321000	0.0140992	1	0.288232	2872.8	457.522	3500	16887	705.8	2095	1001.3	593.3	1588.5	1318.3
2008	320000	321100	0.0175013	1	0.32928	2993.76	420.52	3500	16887	705.8	2095	1001.3	593.3	1588.5	1318.3
2008	320000	321200	0.0115813	1	0.318472	3339.84	663.142	3500	16887	705.8	2095	1001.3	593.3	1588.5	1318.3
2008	320000	321300	0.00473667	1	0.317352	3221.12	458.602	3500	16887	705.8	2095	1001.3	593.3	1588.5	1318.3
2008	330000	330100	0.047025	1	0.284312	3223.92	535.056	4142.5	19605	822.6	2131	1166.5	646.9	1991.8	1503.8
2008	330000	330200	0.0567677	1	0.33572	2896.88	493.462	4142.5	19605	822.6	2131	1166.5	646.9	1991.8	1503.8
2008	330000	330300	0.0215427	1	0.281904	3322.48	602.455	4142.5	19605	822.6	2131	1166.5	646.9	1991.8	1503.8
2008	330000	330400	0.0261362	1	0.308784	3059.28	521.505	4142.5	19605	822.6	2131	1166.5	646.9	1991.8	1503.8
2008	330000	330500	0.0179616	1	0.313152	2939.44	478.231	4142.5	19605	822.6	2131	1166.5	646.9	1991.8	1503.8
2008	330000	330600	0.0191025	1	0.317296	2859.36	355.009	4142.5	19605	822.6	2131	1166.5	646.9	1991.8	1503.8
2008	330000	330700	0.0199259	1	0.331464	3161.76	437.057	4142.5	19605	822.6	2131	1166.5	646.9	1991.8	1503.8
2008	330000	330800	0.0130563	1	0.310464	2814	408.344	4142.5	19605	822.6	2131	1166.5	646.9	1991.8	1503.8
2008	330000	330900	0.0261113	1	0.334992	3231.2	489.179	4142.5	19605	822.6	2131	1166.5	646.9	1991.8	1503.8
2008	330000	331000	0.0179191	1	0.28168	2942.24	515.493	4142.5	19605	822.6	2131	1166.5	646.9	1991.8	1503.8
2008	330000	331100	0.0142231	1	0.314832	2882.32	482.314	4142.5	19605	822.6	2131	1166.5	646.9	1991.8	1503.8
2008	340000	340100	0.0152429	1	0.169232	1942.08	374.53	3500	16887	705.8	2095	1001.3	593.3	1588.5	1318.3
2008	340000	340181	0.00388523	1	#N/A	#N/A	#N/A	3500	16887	705.8	2095	1001.3	593.3	1588.5	1318.3
2008	340000	340200	0.0143728	1	0.174048	2106.16	429.801	3500	16887	705.8	2095	1001.3	593.3	1588.5	1318.3
2008	340000	340300	0.00742917	1	0.178528	1801.52	335.26	3500	16887	705.8	2095	1001.3	593.3	1588.5	1318.3
2008	340000	340400	0.00702041	1	0.212856	1735.44	232.397	3500	16887	705.8	2095	1001.3	593.3	1588.5	1318.3
2008	340000	340500	0.0130194	1	0.200928	1996.4	347.374	3500	16887	705.8	2095	1001.3	593.3	1588.5	1318.3
2008	340000	340600	0.00657059	1	0.195888	1739.36	350.598	3500	16887	705.8	2095	1001.3	593.3	1588.5	1318.3
2008	340000	340700	0.0138375	1	0.19292	1769.04	293.014	3500	16887	705.8	2095	1001.3	593.3	1588.5	1318.3
2008	340000	340800	0.0049113	1	0.171696	2216.48	311.617	3500	16887	705.8	2095	1001.3	593.3	1588.5	1318.3
2008	340000	341000	0.0100617	1	0.183232	1884.96	279.039	3500	16887	705.8	2095	1001.3	593.3	1588.5	1318.3
2008	340000	341100	0.00487026	1	0.181664	1688.4	253.431	3500	16887	705.8	2095	1001.3	593.3	1588.5	1318.3
2008	340000	341200	0.00202862	1	0.18648	1699.6	231.324	3500	16887	705.8	2095	1001.3	593.3	1588.5	1318.3
2008	340000	341300	0.00392964	1	0.180936	1885.52	271.142	3500	16887	705.8	2095	1001.3	593.3	1588.5	1318.3
2008	340000	341500	0.00458998	1	0.210504	2055.76	346.181	3500	16887	705.8	2095	1001.3	593.3	1588.5	1318.3
2008	340000	341600	0.0034682	1	0.176624	1985.76	330.076	3500	16887	705.8	2095	1001.3	593.3	1588.5	1318.3
2008	340000	341700	0.00551484	1	0.177856	2018.24	295.79	3500	16887	705.8	2095	1001.3	593.3	1588.5	1318.3
2008	340000	341800	0.00642048	1	0.19572	2077.6	370.201	3500	16887	705.8	2095	1001.3	593.3	1588.5	1318.3
2008	360000	360100	0.0204639	1	0.179312	1697.92	244.807	3500	16887	705.8	2095	1001.3	593.3	1588.5	1318.3
2008	360000	360200	0.00947317	1	0.222824	1742.72	276.455	3500	16887	705.8	2095	1001.3	593.3	1588.5	1318.3
2008	360000	360300	0.0108571	1	0.184072	1968.96	383.19	3500	16887	705.8	2095	1001.3	593.3	1588.5	1318.3
2008	360000	360400	0.00637147	1	0.201488	2140.32	336.408	3500	16887	705.8	2095	1001.3	593.3	1588.5	1318.3
2008	360000	360500	0.0137465	1	0.218736	2109.52	414.525	3500	16887	705.8	2095	1001.3	593.3	1588.5	1318.3
2008	360000	360600	0.00926193	1	0.180824	2085.44	403.128	3500	16887	705.8	2095	1001.3	593.3	1588.5	1318.3
2008	360000	360700	0.00777873	1	0.195216	1941.52	346.004	3500	16887	705.8	2095	1001.3	593.3	1588.5	1318.3
2008	360000	360800	0.00498137	1	0.196616	2003.68	334.422	3500	16887	705.8	2095	1001.3	593.3	1588.5	1318.3
2008	360000	360900	0.00578744	1	0.217	1999.76	298.009	3500	16887	705.8	2095	1001.3	593.3	1588.5	1318.3
2008	360000	361000	0.00737473	1	0.219296	1945.44	326.571	3500	16887	705.8	2095	1001.3	593.3	1588.5	1318.3
2008	360000	361100	0.00584766	1	0.190792	2100	351.334	3500	16887	705.8	2095	1001.3	593.3	1588.5	1318.3
2008	420000	420100	0.0259978	1	0.286832	3260.32	443.415	3500	16887	705.8	2095	1001.3	593.3	1588.5	1318.3
2008	420000	420200	0.010384	1	0.322	2894.64	494.243	3500	16887	705.8	2095	1001.3	593.3	1588.5	1318.3
2008	420000	420300	0.0126053	1	0.331128	3091.2	448.008	3500	16887	705.8	2095	1001.3	593.3	1588.5	1318.3
2008	420000	420500	0.0104895	1	0.32508	3005.52	469.102	3500	16887	705.8	2095	1001.3	593.3	1588.5	1318.3
2008	420000	420600	0.00686947	1	0.317072	3302.32	647.516	3500	16887	705.8	2095	1001.3	593.3	1588.5	1318.3
2008	420000	420700	0.00852068	1	0.33432	3260.88	505.904	3500	16887	705.8	2095	1001.3	593.3	1588.5	1318.3
2008	420000	420800	0.00622948	1	0.313264	3312.96	611.41	3500	16887	705.8	2095	1001.3	593.3	1588.5	1318.3
2008	420000	420900	0.00534024	1	0.29512	2867.2	499.727	3500	16887	705.8	2095	1001.3	593.3	1588.5	1318.3
2008	420000	421000	0.00641693	1	0.319592	3333.68	496.39	3500	16887	705.8	2095	1001.3	593.3	1588.5	1318.3
2008	420000	421100	0.00424139	1	0.292544	3275.44	633.135	3500	16887	705.8	2095	1001.3	593.3	1588.5	1318.3
2008	420000	421200	0.00632027	1	0.319256	3212.16	504.638	3500	16887	705.8	2095	1001.3	593.3	1588.5	1318.3
2008	420000	421300	0.00487213	1	0.313544	3042.48	495.663	3500	16887	705.8	2095	1001.3	593.3	1588.5	1318.3
2008	430000	430100	0.0244117	1	0.286496	3221.68	511.262	3500	16887	705.8	2095	1001.3	593.3	1588.5	1318.3
2008	430000	430200	0.012034	1	0.283584	3067.12	481.803	3500	16887	705.8	2095	1001.3	593.3	1588.5	1318.3
2008	430000	430300	0.0106181	1	0.307944	2885.12	410.624	3500	16887	705.8	2095	1001.3	593.3	1588.5	1318.3
2008	430000	430400	0.00694532	1	0.333704	2895.76	557.519	3500	16887	705.8	2095	1001.3	593.3	1588.5	1318.3
2008	430000	430500	0.00460671	1	0.290192	3118.64	533.907	3500	16887	705.8	2095	1001.3	593.3	1588.5	1318.3
2008	430000	430600	0.00654259	1	0.300328	3113.6	520.698	3500	16887	705.8	2095	1001.3	593.3	1588.5	1318.3
2008	430000	430700	0.00638545	1	0.316176	3193.12	575.63	3500	16887	705.8	2095	1001.3	593.3	1588.5	1318.3
2008	430000	430800	0.00841204	1	0.303128	2834.16	472.219	3500	16887	705.8	2095	1001.3	593.3	1588.5	1318.3
2008	430000	430900	0.00541127	1	0.332304	3253.6	661.824	3500	16887	705.8	2095	1001.3	593.3	1588.5	1318.3
2008	430000	431000	0.00596091	1	0.317016	3281.04	464.804	3500	16887	705.8	2095	1001.3	593.3	1588.5	1318.3
2008	430000	431100	0.00396579	1	0.293888	2919.28	494.957	3500	16887	705.8	2095	1001.3	593.3	1588.5	1318.3
2008	430000	431200	0.00543661	1	0.334824	2923.76	490.36	3500	16887	705.8	2095	1001.3	593.3	1588.5	1318.3
2008	430000	431300	0.0054528	1	0.298704	3023.44	417.557	3500	16887	705.8	2095	1001.3	593.3	1588.5	1318.3
2007	310000	310000	0.0850106	1	#N/A		#N/A	2957.3	14567	589.1	2050	842.7	502.5	1409.8	1045.1
2007	320000	320100	0.0267927	1	0.3078	3181.14	543.582	2957.3	14567	589.1	2050	842.7	502.5	1409.8	1045.1
2007	320000	320200	0.027424	1	0.317358	2808.54	448.447	2957.3	14567	589.1	2050	842.7	502.5	1409.8	1045.1
2007	320000	320300	0.00707874	1	0.286146	2978.64	429.41	2957.3	14567	589.1	2050	842.7	502.5	1409.8	1045.1
2007	320000	320400	0.0211414	1	0.297918	2943	450.429	2957.3	14567	589.1	2050	842.7	502.5	1409.8	1045.1
2007	320000	320500	0.0344284	1	0.27837	2794.5	445.479	2957.3	14567	589.1	2050	842.7	502.5	1409.8	1045.1
2007	320000	320600	0.00983855	1	0.303966	3016.44	629.884	2957.3	14567	589.1	2050	842.7	502.5	1409.8	1045.1
2007	320000	320700	0.0076546	1	0.32049	3202.74	613.079	2957.3	14567	589.1	2050	842.7	502.5	1409.8	1045.1
2007	320000	320800	0.00669323	1	0.292518	2796.66	509.94	2957.3	14567	589.1	2050	842.7	502.5	1409.8	1045.1
2007	320000	320900	0.00695586	1	0.30969	3184.38	422.96	2957.3	14567	589.1	2050	842.7	502.5	1409.8	1045.1
2007	320000	321000	0.0119388	1	0.307854	3223.8	488.079	2957.3	14567	589.1	2050	842.7	502.5	1409.8	1045.1
2007	320000	321100	0.0160014	1	0.285876	2861.46	509.114	2957.3	14567	589.1	2050	842.7	502.5	1409.8	1045.1
2007	320000	321200	0.0103495	1	0.280314	2755.62	511.071	2957.3	14567	589.1	2050	842.7	502.5	1409.8	1045.1
2007	320000	321300	0.00413655	1	0.287226	2849.04	443.13	2957.3	14567	589.1	2050	842.7	502.5	1409.8	1045.1
2007	330000	330100	0.0448895	1	0.295326	3048.84	488.415	3500	16887	705.8	2095	1001.3	593.3	1588.5	1318.3
2007	330000	330200	0.0390276	1	0.309312	3099.6	434.106	3500	16887	705.8	2095	1001.3	593.3	1588.5	1318.3
2007	330000	330300	0.021248	1	0.276642	2729.7	517.429	3500	16887	705.8	2095	1001.3	593.3	1588.5	1318.3
2007	330000	330400	0.0259308	1	0.315522	2798.82	464.409	3500	16887	705.8	2095	1001.3	593.3	1588.5	1318.3
2007	330000	330500	0.0170453	1	0.283392	2754	375.9	3500	16887	705.8	2095	1001.3	593.3	1588.5	1318.3
2007	330000	330600	0.0183872	1	0.301428	2903.58	531.049	3500	16887	705.8	2095	1001.3	593.3	1588.5	1318.3
2007	330000	330700	0.0196701	1	0.322866	2789.64	505.542	3500	16887	705.8	2095	1001.3	593.3	1588.5	1318.3
2007	330000	330800	0.0140107	1	0.319302	3228.66	573.866	3500	16887	705.8	2095	1001.3	593.3	1588.5	1318.3
2007	330000	330900	0.0246212	1	0.314766	3128.76	532.503	3500	16887	705.8	2095	1001.3	593.3	1588.5	1318.3
2007	330000	331000	0.0175618	1	0.313038	3223.8	453.005	3500	16887	705.8	2095	1001.3	593.3	1588.5	1318.3
2007	330000	331100	0.0147912	1	0.297216	3210.84	580.349	3500	16887	705.8	2095	1001.3	593.3	1588.5	1318.3
2007	340000	340100	0.0144549	1	0.166752	1662.12	228.412	2957.3	14567	589.1	2050	842.7	502.5	1409.8	1045.1
2007	340000	340181	0.00365102	1	#N/A	#N/A	#N/A	2957.3	14567	589.1	2050	842.7	502.5	1409.8	1045.1
2007	340000	340200	0.013139	1	0.214488	1858.68	360.721	2957.3	14567	589.1	2050	842.7	502.5	1409.8	1045.1
2007	340000	340300	0.00738658	1	0.204714	1885.14	257.68	2957.3	14567	589.1	2050	842.7	502.5	1409.8	1045.1
2007	340000	340400	0.00675386	1	0.203904	2114.64	285.744	2957.3	14567	589.1	2050	842.7	502.5	1409.8	1045.1
2007	340000	340500	0.0107624	1	0.204228	2111.4	393.549	2957.3	14567	589.1	2050	842.7	502.5	1409.8	1045.1
2007	340000	340600	0.00591478	1	0.198018	2002.86	279.392	2957.3	14567	589.1	2050	842.7	502.5	1409.8	1045.1
2007	340000	340700	0.0135552	1	0.193482	2109.78	423.577	2957.3	14567	589.1	2050	842.7	502.5	1409.8	1045.1
2007	340000	340800	0.00486588	1	0.18927	1911.6	357.805	2957.3	14567	589.1	2050	842.7	502.5	1409.8	1045.1
2007	340000	341000	0.0115122	1	0.21168	1780.38	339.037	2957.3	14567	589.1	2050	842.7	502.5	1409.8	1045.1
2007	340000	341100	0.0045802	1	0.171882	2089.26	308.714	2957.3	14567	589.1	2050	842.7	502.5	1409.8	1045.1
2007	340000	341200	0.00209765	1	0.171774	1713.42	269.064	2957.3	14567	589.1	2050	842.7	502.5	1409.8	1045.1
2007	340000	341300	0.00349426	1	0.20115	1888.38	331.147	2957.3	14567	589.1	2050	842.7	502.5	1409.8	1045.1
2007	340000	341500	0.00350593	1	0.179064	1904.04	259.897	2957.3	14567	589.1	2050	842.7	502.5	1409.8	1045.1
2007	340000	341600	0.00282889	1	0.199098	2039.04	396.761	2957.3	14567	589.1	2050	842.7	502.5	1409.8	1045.1
2007	340000	341700	0.00522922	1	0.18387	1894.32	255.901	2957.3	14567	589.1	2050	842.7	502.5	1409.8	1045.1
2007	340000	341800	0.00598813	1	0.16713	1851.66	334.883	2957.3	14567	589.1	2050	842.7	502.5	1409.8	1045.1
2007	360000	360100	0.0225632	1	0.165024	1772.82	317.376	2957.3	14567	589.1	2050	842.7	502.5	1409.8	1045.1
2007	360000	360200	0.00920095	1	0.193266	1757.7	298.602	2957.3	14567	589.1	2050	842.7	502.5	1409.8	1045.1
2007	360000	360300	0.0111698	1	0.204714	1936.98	290.345	2957.3	14567	589.1	2050	842.7	502.5	1409.8	1045.1
2007	360000	360400	0.00720099	1	0.195804	1727.46	256.156	2957.3	14567	589.1	2050	842.7	502.5	1409.8	1045.1
2007	360000	360500	0.0215755	1	0.168426	1652.4	288.48	2957.3	14567	589.1	2050	842.7	502.5	1409.8	1045.1
2007	360000	360600	0.00887358	1	0.197424	1883.52	307.702	2957.3	14567	589.1	2050	842.7	502.5	1409.8	1045.1
2007	360000	360700	0.007164	1	0.2052	2092.5	308.082	2957.3	14567	589.1	2050	842.7	502.5	1409.8	1045.1
2007	360000	360800	0.024538	1	0.188784	1626.48	284.021	2957.3	14567	589.1	2050	842.7	502.5	1409.8	1045.1
2007	360000	360900	0.00522568	1	0.182952	1793.34	249.005	2957.3	14567	589.1	2050	842.7	502.5	1409.8	1045.1
2007	360000	361000	0.00697183	1	0.194292	1824.12	243.633	2957.3	14567	589.1	2050	842.7	502.5	1409.8	1045.1
2007	360000	361100	0.00719692	1	0.207036	1841.4	245.413	2957.3	14567	589.1	2050	842.7	502.5	1409.8	1045.1
2007	420000	420100	0.024739	1	0.304182	3113.1	457.239	2957.3	14567	589.1	2050	842.7	502.5	1409.8	1045.1
2007	420000	420200	0.00922034	1	0.298512	2911.68	496.342	2957.3	14567	589.1	2050	842.7	502.5	1409.8	1045.1
2007	420000	420300	0.00741325	1	0.297972	2952.72	461.225	2957.3	14567	589.1	2050	842.7	502.5	1409.8	1045.1
2007	420000	420500	0.00937222	1	0.297648	2855.52	486.941	2957.3	14567	589.1	2050	842.7	502.5	1409.8	1045.1
2007	420000	420600	0.00706287	1	0.30618	3035.88	465.861	2957.3	14567	589.1	2050	842.7	502.5	1409.8	1045.1
2007	420000	420700	0.0074626	1	0.293166	3183.84	457.344	2957.3	14567	589.1	2050	842.7	502.5	1409.8	1045.1
2007	420000	420800	0.00709362	1	0.299106	3056.94	545.474	2957.3	14567	589.1	2050	842.7	502.5	1409.8	1045.1
2007	420000	420900	0.00450798	1	0.314712	2982.42	602.76	2957.3	14567	589.1	2050	842.7	502.5	1409.8	1045.1
2007	420000	421000	0.00659738	1	0.309366	2750.76	346.718	2957.3	14567	589.1	2050	842.7	502.5	1409.8	1045.1
2007	420000	421100	0.00400841	1	0.285552	3204.36	398.836	2957.3	14567	589.1	2050	842.7	502.5	1409.8	1045.1
2007	420000	421200	0.00591541	1	0.323892	2863.62	380.933	2957.3	14567	589.1	2050	842.7	502.5	1409.8	1045.1
2007	420000	421300	0.00478475	1	0.319086	2842.56	497.147	2957.3	14567	589.1	2050	842.7	502.5	1409.8	1045.1
2007	430000	430100	0.02576	1	0.317682	2929.5	603.768	2957.3	14567	589.1	2050	842.7	502.5	1409.8	1045.1
2007	430000	430200	0.010652	1	0.302778	3153.06	537.031	2957.3	14567	589.1	2050	842.7	502.5	1409.8	1045.1
2007	430000	430300	0.0113143	1	0.300024	2732.94	396.07	2957.3	14567	589.1	2050	842.7	502.5	1409.8	1045.1
2007	430000	430400	0.00501135	1	0.313848	2981.88	512.636	2957.3	14567	589.1	2050	842.7	502.5	1409.8	1045.1
2007	430000	430500	0.00419454	1	0.314712	3218.4	445.916	2957.3	14567	589.1	2050	842.7	502.5	1409.8	1045.1
2007	430000	430600	0.00621185	1	0.311796	3126.6	528.01	2957.3	14567	589.1	2050	842.7	502.5	1409.8	1045.1
2007	430000	430700	0.00627383	1	0.310014	3116.34	556.039	2957.3	14567	589.1	2050	842.7	502.5	1409.8	1045.1
2007	430000	430800	0.00760853	1	0.319626	2805.84	530.541	2957.3	14567	589.1	2050	842.7	502.5	1409.8	1045.1
2007	430000	430900	0.0059774	1	0.287388	3064.5	572.338	2957.3	14567	589.1	2050	842.7	502.5	1409.8	1045.1
2007	430000	431000	0.00563157	1	0.28863	2732.94	413.209	2957.3	14567	589.1	2050	842.7	502.5	1409.8	1045.1
2007	430000	431100	0.00415597	1	0.29241	2955.42	524.287	2957.3	14567	589.1	2050	842.7	502.5	1409.8	1045.1
2007	430000	431200	0.00651368	1	0.305586	3016.44	428.011	2957.3	14567	589.1	2050	842.7	502.5	1409.8	1045.1
2007	430000	431300	0.00437094	1	0.307638	2738.88	498.2	2957.3	14567	589.1	2050	842.7	502.5	1409.8	1045.1
2006	310000	310000	0.0877339	1	#N/A		#N/A	2520.5	12687	518.8	2010	757.8	485.6	1127.1	907.8
2006	320000	320100	0.0263588	1	0.282516	2642.12	420.61	2520.5	12687	518.8	2010	757.8	485.6	1127.1	907.8
2006	320000	320200	0.0276393	1	0.307112	2860.52	515.905	2520.5	12687	518.8	2010	757.8	485.6	1127.1	907.8
2006	320000	320300	0.0069024	1	0.280904	2933.32	516.602	2520.5	12687	518.8	2010	757.8	485.6	1127.1	907.8
2006	320000	320400	0.0187979	1	0.274872	2876.64	454.046	2520.5	12687	518.8	2010	757.8	485.6	1127.1	907.8
2006	320000	320500	0.0303461	1	0.278668	2775.24	514.865	2520.5	12687	518.8	2010	757.8	485.6	1127.1	907.8
2006	320000	320600	0.00911124	1	0.263016	2718.56	499.338	2520.5	12687	518.8	2010	757.8	485.6	1127.1	907.8
2006	320000	320700	0.00736209	1	0.287768	2985.32	551.714	2520.5	12687	518.8	2010	757.8	485.6	1127.1	907.8
2006	320000	320800	0.00602308	1	0.269828	3053.44	520.689	2520.5	12687	518.8	2010	757.8	485.6	1127.1	907.8
2006	320000	320900	0.0070455	1	0.292656	2863.64	582.042	2520.5	12687	518.8	2010	757.8	485.6	1127.1	907.8
2006	320000	321000	0.0123235	1	0.297076	2747.68	338.791	2520.5	12687	518.8	2010	757.8	485.6	1127.1	907.8
2006	320000	321100	0.0155736	1	0.294216	2809.04	352.54	2520.5	12687	518.8	2010	757.8	485.6	1127.1	907.8
2006	320000	321200	0.00879409	1	0.304356	2668.64	410.636	2520.5	12687	518.8	2010	757.8	485.6	1127.1	907.8
2006	320000	321300	0.00313039	1	0.26884	2607.8	528.885	2520.5	12687	518.8	2010	757.8	485.6	1127.1	907.8
2006	330000	330100	0.0445284	1	0.270296	2851.16	430.246	2957.3	14567	589.1	2050	842.7	502.5	1409.8	1045.1
2006	330000	330200	0.0274403	1	0.30446	2766.4	362.119	2957.3	14567	589.1	2050	842.7	502.5	1409.8	1045.1
2006	330000	330300	0.0237033	1	0.296296	2761.72	495.694	2957.3	14567	589.1	2050	842.7	502.5	1409.8	1045.1
2006	330000	330400	0.0263004	1	0.263588	2685.8	515.946	2957.3	14567	589.1	2050	842.7	502.5	1409.8	1045.1
2006	330000	330500	0.0170811	1	0.304096	3105.96	557.296	2957.3	14567	589.1	2050	842.7	502.5	1409.8	1045.1
2006	330000	330600	0.0172192	1	0.26806	2874.56	391.715	2957.3	14567	589.1	2050	842.7	502.5	1409.8	1045.1
2006	330000	330700	0.0177498	1	0.276796	2819.96	495.181	2957.3	14567	589.1	2050	842.7	502.5	1409.8	1045.1
2006	330000	330800	0.0130253	1	0.307372	3064.88	619.264	2957.3	14567	589.1	2050	842.7	502.5	1409.8	1045.1
2006	330000	330900	0.0242765	1	0.274352	3024.32	537.778	2957.3	14567	589.1	2050	842.7	502.5	1409.8	1045.1
2006	330000	331000	0.0183723	1	0.288912	2730	386.066	2957.3	14567	589.1	2050	842.7	502.5	1409.8	1045.1
2006	330000	331100	0.0146192	1	0.266292	2823.08	580.998	2957.3	14567	589.1	2050	842.7	502.5	1409.8	1045.1
2006	340000	340100	0.0181424	1	0.199004	1697.8	225.45	2520.5	12687	518.8	2010	757.8	485.6	1127.1	907.8
2006	340000	340181	0.0033398	1	#N/A	#N/A	#N/A	2520.5	12687	518.8	2010	757.8	485.6	1127.1	907.8
2006	340000	340200	0.0126253	1	0.173576	2062.32	285.936	2520.5	12687	518.8	2010	757.8	485.6	1127.1	907.8
2006	340000	340300	0.0068196	1	0.162812	1687.92	326.886	2520.5	12687	518.8	2010	757.8	485.6	1127.1	907.8
2006	340000	340400	0.00667897	1	0.205088	2039.44	314.223	2520.5	12687	518.8	2010	757.8	485.6	1127.1	907.8
2006	340000	340500	0.00916199	1	0.196144	2073.76	285.739	2520.5	12687	518.8	2010	757.8	485.6	1127.1	907.8
2006	340000	340600	0.00571907	1	0.174772	1977.04	375.43	2520.5	12687	518.8	2010	757.8	485.6	1127.1	907.8
2006	340000	340700	0.0131175	1	0.163488	1573.52	209.542	2520.5	12687	518.8	2010	757.8	485.6	1127.1	907.8
2006	340000	340800	0.00457877	1	0.190944	2047.24	311.063	2520.5	12687	518.8	2010	757.8	485.6	1127.1	907.8
2006	340000	341000	0.0109827	1	0.186368	1744.6	298	2520.5	12687	518.8	2010	757.8	485.6	1127.1	907.8
2006	340000	341100	0.00521939	1	0.173316	2046.72	295.214	2520.5	12687	518.8	2010	757.8	485.6	1127.1	907.8
2006	340000	341200	0.00219305	1	0.192296	1618.24	215.923	2520.5	12687	518.8	2010	757.8	485.6	1127.1	907.8
2006	340000	341300	0.00371992	1	0.176384	1797.64	297.666	2520.5	12687	518.8	2010	757.8	485.6	1127.1	907.8
2006	340000	341500	0.00340034	1	0.194948	2007.2	368.644	2520.5	12687	518.8	2010	757.8	485.6	1127.1	907.8
2006	340000	341600	0.00311221	1	0.193492	2059.72	356.696	2520.5	12687	518.8	2010	757.8	485.6	1127.1	907.8
2006	340000	341700	0.00513156	1	0.172068	1718.6	226.27	2520.5	12687	518.8	2010	757.8	485.6	1127.1	907.8
2006	340000	341800	0.00660538	1	0.203112	1614.6	300.586	2520.5	12687	518.8	2010	757.8	485.6	1127.1	907.8
2006	360000	360100	0.025267	1	0.15756	2007.2	308.884	2520.5	12687	518.8	2010	757.8	485.6	1127.1	907.8
2006	360000	360200	0.00907401	1	0.204724	1736.28	275.455	2520.5	12687	518.8	2010	757.8	485.6	1127.1	907.8
2006	360000	360300	0.00999396	1	0.188448	1970.28	360.332	2520.5	12687	518.8	2010	757.8	485.6	1127.1	907.8
2006	360000	360400	0.00683929	1	0.172796	1798.16	287.84	2520.5	12687	518.8	2010	757.8	485.6	1127.1	907.8
2006	360000	360500	0.0229782	1	0.18044	1945.84	334.243	2520.5	12687	518.8	2010	757.8	485.6	1127.1	907.8
2006	360000	360600	0.0102039	1	0.166296	1629.16	220.678	2520.5	12687	518.8	2010	757.8	485.6	1127.1	907.8
2006	360000	360700	0.0056634	1	0.182156	1591.72	267.429	2520.5	12687	518.8	2010	757.8	485.6	1127.1	907.8
2006	360000	360800	0.00513289	1	0.19682	2073.24	353.63	2520.5	12687	518.8	2010	757.8	485.6	1127.1	907.8
2006	360000	360900	0.00662875	1	0.161564	1972.36	279.81	2520.5	12687	518.8	2010	757.8	485.6	1127.1	907.8
2006	360000	361000	0.00669991	1	0.200616	1996.8	249.797	2520.5	12687	518.8	2010	757.8	485.6	1127.1	907.8
2006	360000	361100	0.00753412	1	0.184704	1917.76	251.498	2520.5	12687	518.8	2010	757.8	485.6	1127.1	907.8
2006	420000	420100	0.036187	1	0.273468	2777.84	486.42	2520.5	12687	518.8	2010	757.8	485.6	1127.1	907.8
2006	420000	420200	0.00843775	1	0.306072	2774.2	527.805	2520.5	12687	518.8	2010	757.8	485.6	1127.1	907.8
2006	420000	420300	0.00605395	1	0.279396	2882.88	403.861	2520.5	12687	518.8	2010	757.8	485.6	1127.1	907.8
2006	420000	420500	0.00862528	1	0.26884	2993.12	457.546	2520.5	12687	518.8	2010	757.8	485.6	1127.1	907.8
2006	420000	420600	0.00620104	1	0.300456	2695.68	448.613	2520.5	12687	518.8	2010	757.8	485.6	1127.1	907.8
2006	420000	420700	0.00650757	1	0.26208	3056.56	497.914	2520.5	12687	518.8	2010	757.8	485.6	1127.1	907.8
2006	420000	420800	0.00619014	1	0.308308	2731.56	383.914	2520.5	12687	518.8	2010	757.8	485.6	1127.1	907.8
2006	420000	420900	0.00383314	1	0.28314	2816.84	367.879	2520.5	12687	518.8	2010	757.8	485.6	1127.1	907.8
2006	420000	421000	0.00553579	1	0.276588	2909.92	442.025	2520.5	12687	518.8	2010	757.8	485.6	1127.1	907.8
2006	420000	421100	0.0038301	1	0.292968	2627.56	423.654	2520.5	12687	518.8	2010	757.8	485.6	1127.1	907.8
2006	420000	421200	0.00563955	1	0.282984	2732.08	493.478	2520.5	12687	518.8	2010	757.8	485.6	1127.1	907.8
2006	420000	421300	0.00389524	1	0.26598	2697.76	388.295	2520.5	12687	518.8	2010	757.8	485.6	1127.1	907.8
2006	430000	430100	0.0278433	1	0.26234	2735.72	484.971	2520.5	12687	518.8	2010	757.8	485.6	1127.1	907.8
2006	430000	430200	0.0118934	1	0.269828	2652.52	392.12	2520.5	12687	518.8	2010	757.8	485.6	1127.1	907.8
2006	430000	430300	0.0101611	1	0.26754	3110.12	460.035	2520.5	12687	518.8	2010	757.8	485.6	1127.1	907.8
2006	430000	430400	0.00491301	1	0.260676	2959.32	579.288	2520.5	12687	518.8	2010	757.8	485.6	1127.1	907.8
2006	430000	430500	0.00422999	1	0.27768	2751.84	394.946	2520.5	12687	518.8	2010	757.8	485.6	1127.1	907.8
2006	430000	430600	0.00617561	1	0.265148	3014.96	395.681	2520.5	12687	518.8	2010	757.8	485.6	1127.1	907.8
2006	430000	430700	0.00565963	1	0.295204	2646.28	518.636	2520.5	12687	518.8	2010	757.8	485.6	1127.1	907.8
2006	430000	430800	0.0069822	1	0.2639	2616.64	508.638	2520.5	12687	518.8	2010	757.8	485.6	1127.1	907.8
2006	430000	430900	0.00534045	1	0.264628	2904.72	415.103	2520.5	12687	518.8	2010	757.8	485.6	1127.1	907.8
2006	430000	431000	0.00608917	1	0.30342	2980.64	541.948	2520.5	12687	518.8	2010	757.8	485.6	1127.1	907.8
2006	430000	431100	0.00263343	1	0.302796	3042	449.904	2520.5	12687	518.8	2010	757.8	485.6	1127.1	907.8
2006	430000	431200	0.00684498	1	0.31148	2861.04	443.283	2520.5	12687	518.8	2010	757.8	485.6	1127.1	907.8
2006	430000	431300	0.0043622	1	0.267644	3039.4	602.966	2520.5	12687	518.8	2010	757.8	485.6	1127.1	907.8
2005	310000	310000	0.0742032	1	#N/A		#N/A	2170.4	11139	461.3	1963	671.3	439.2	887.1	844.1
2005	320000	320100	0.0226581	1	0.2594	2998.5	474.088	2170.4	11139	461.3	1963	671.3	439.2	887.1	844.1
2005	320000	320200	0.0236744	1	0.2771	2781.5	487.604	2170.4	11139	461.3	1963	671.3	439.2	887.1	844.1
2005	320000	320300	0.00566171	1	0.25275	2962	566.352	2170.4	11139	461.3	1963	671.3	439.2	887.1	844.1
2005	320000	320400	0.0157898	1	0.25565	2611	509.685	2170.4	11139	461.3	1963	671.3	439.2	887.1	844.1
2005	320000	320500	0.0270072	1	0.27605	2888	473.955	2170.4	11139	461.3	1963	671.3	439.2	887.1	844.1
2005	320000	320600	0.00830912	1	0.291	2556.5	393.282	2170.4	11139	461.3	1963	671.3	439.2	887.1	844.1
2005	320000	320700	0.00534836	1	0.26385	2576	379.818	2170.4	11139	461.3	1963	671.3	439.2	887.1	844.1
2005	320000	320800	0.0053496	1	0.2856	2521	396.757	2170.4	11139	461.3	1963	671.3	439.2	887.1	844.1
2005	320000	320900	0.00620079	1	0.29925	2757.5	390.873	2170.4	11139	461.3	1963	671.3	439.2	887.1	844.1
2005	320000	321000	0.0113746	1	0.268	2785	529.346	2170.4	11139	461.3	1963	671.3	439.2	887.1	844.1
2005	320000	321100	0.0125116	1	0.29405	2835	530.695	2170.4	11139	461.3	1963	671.3	439.2	887.1	844.1
2005	320000	321200	0.00837071	1	0.2836	2970	406.509	2170.4	11139	461.3	1963	671.3	439.2	887.1	844.1
2005	320000	321300	0.00276799	1	0.28095	2710.5	374.935	2170.4	11139	461.3	1963	671.3	439.2	887.1	844.1
2005	330000	330100	0.0320523	1	0.29315	2997.5	586.321	2520.5	12687	518.8	2010	757.8	485.6	1127.1	907.8
2005	330000	330200	0.0334396	1	0.2556	2834.5	473.174	2520.5	12687	518.8	2010	757.8	485.6	1127.1	907.8
2005	330000	330300	0.0210374	1	0.2927	2569.5	459.24	2520.5	12687	518.8	2010	757.8	485.6	1127.1	907.8
2005	330000	330400	0.0217906	1	0.28485	2957.5	560.619	2520.5	12687	518.8	2010	757.8	485.6	1127.1	907.8
2005	330000	330500	0.014491	1	0.2864	2892	508.664	2520.5	12687	518.8	2010	757.8	485.6	1127.1	907.8
2005	330000	330600	0.0150651	1	0.2502	2865.5	528.511	2520.5	12687	518.8	2010	757.8	485.6	1127.1	907.8
2005	330000	330700	0.017533	1	0.29785	2869	417.246	2520.5	12687	518.8	2010	757.8	485.6	1127.1	907.8
2005	330000	330800	0.0110301	1	0.2586	2665.5	541.645	2520.5	12687	518.8	2010	757.8	485.6	1127.1	907.8
2005	330000	330900	0.0225833	1	0.2853	2751.5	402.771	2520.5	12687	518.8	2010	757.8	485.6	1127.1	907.8
2005	330000	331000	0.0156568	1	0.27755	2736	443.414	2520.5	12687	518.8	2010	757.8	485.6	1127.1	907.8
2005	330000	331100	0.0125412	1	0.274	2758	519.49	2520.5	12687	518.8	2010	757.8	485.6	1127.1	907.8
2005	340000	340100	0.0189254	1	0.1854	1827	300.205	2170.4	11139	461.3	1963	671.3	439.2	887.1	844.1
2005	340000	340181	0.00349764	1	#N/A	#N/A	#N/A	2170.4	11139	461.3	1963	671.3	439.2	887.1	844.1
2005	340000	340200	0.0128225	1	0.1952	1675.5	299.741	2170.4	11139	461.3	1963	671.3	439.2	887.1	844.1
2005	340000	340300	0.0069962	1	0.1812	1955	310.245	2170.4	11139	461.3	1963	671.3	439.2	887.1	844.1
2005	340000	340400	0.00689444	1	0.19105	1551.5	225.958	2170.4	11139	461.3	1963	671.3	439.2	887.1	844.1
2005	340000	340500	0.00988754	1	0.1703	1818	369.483	2170.4	11139	461.3	1963	671.3	439.2	887.1	844.1
2005	340000	340600	0.00449766	1	0.1631	1534.5	241.737	2170.4	11139	461.3	1963	671.3	439.2	887.1	844.1
2005	340000	340700	0.0103504	1	0.16515	1665	319.278	2170.4	11139	461.3	1963	671.3	439.2	887.1	844.1
2005	340000	340800	0.0036676	1	0.15095	1516	294.461	2170.4	11139	461.3	1963	671.3	439.2	887.1	844.1
2005	340000	341000	0.00769714	1	0.15845	1669.5	287.935	2170.4	11139	461.3	1963	671.3	439.2	887.1	844.1
2005	340000	341100	0.00632713	1	0.1679	1921.5	307.888	2170.4	11139	461.3	1963	671.3	439.2	887.1	844.1
2005	340000	341200	0.00225438	1	0.15895	1845.5	288.872	2170.4	11139	461.3	1963	671.3	439.2	887.1	844.1
2005	340000	341300	0.00285732	1	0.19425	1545.5	269.202	2170.4	11139	461.3	1963	671.3	439.2	887.1	844.1
2005	340000	341500	0.00293579	1	0.184	1602	284.475	2170.4	11139	461.3	1963	671.3	439.2	887.1	844.1
2005	340000	341600	0.00227367	1	0.1713	1826	317.891	2170.4	11139	461.3	1963	671.3	439.2	887.1	844.1
2005	340000	341700	0.00534279	1	0.17445	1993	348.914	2170.4	11139	461.3	1963	671.3	439.2	887.1	844.1
2005	360000	360100	0.0207823	1	0.1643	1531	263.108	2170.4	11139	461.3	1963	671.3	439.2	887.1	844.1
2005	360000	360200	0.00817698	1	0.16455	1607.5	237.92	2170.4	11139	461.3	1963	671.3	439.2	887.1	844.1
2005	360000	360300	0.00914195	1	0.1969	1682.5	286.355	2170.4	11139	461.3	1963	671.3	439.2	887.1	844.1
2005	360000	360400	0.0056876	1	0.1821	1753	305.104	2170.4	11139	461.3	1963	671.3	439.2	887.1	844.1
2005	360000	360500	0.0167338	1	0.1603	1710.5	278.324	2170.4	11139	461.3	1963	671.3	439.2	887.1	844.1
2005	360000	360600	0.00752604	1	0.19305	1845.5	344.168	2170.4	11139	461.3	1963	671.3	439.2	887.1	844.1
2005	360000	360700	0.00510357	1	0.1999	1799	341.395	2170.4	11139	461.3	1963	671.3	439.2	887.1	844.1
2005	360000	360800	0.00447424	1	0.1584	1796	250.726	2170.4	11139	461.3	1963	671.3	439.2	887.1	844.1
2005	360000	360900	0.00510569	1	0.16125	1730	267.232	2170.4	11139	461.3	1963	671.3	439.2	887.1	844.1
2005	360000	361000	0.0059197	1	0.158	1795	243.467	2170.4	11139	461.3	1963	671.3	439.2	887.1	844.1
2005	360000	361100	0.00510475	1	0.1841	1587	290.693	2170.4	11139	461.3	1963	671.3	439.2	887.1	844.1
2005	420000	420100	0.0309056	1	0.25075	2613.5	498.071	2170.4	11139	461.3	1963	671.3	439.2	887.1	844.1
2005	420000	420200	0.00750942	1	0.25795	2639	447.829	2170.4	11139	461.3	1963	671.3	439.2	887.1	844.1
2005	420000	420300	0.00519487	1	0.25745	2709	419.06	2170.4	11139	461.3	1963	671.3	439.2	887.1	844.1
2005	420000	420500	0.00741556	1	0.28445	2596	352.149	2170.4	11139	461.3	1963	671.3	439.2	887.1	844.1
2005	420000	420600	0.00570031	1	0.29085	2554.5	356.201	2170.4	11139	461.3	1963	671.3	439.2	887.1	844.1
2005	420000	420700	0.00513308	1	0.25105	2659	423.16	2170.4	11139	461.3	1963	671.3	439.2	887.1	844.1
2005	420000	420800	0.00505642	1	0.2765	2663.5	403.43	2170.4	11139	461.3	1963	671.3	439.2	887.1	844.1
2005	420000	420900	0.00305982	1	0.26515	2675.5	382.162	2170.4	11139	461.3	1963	671.3	439.2	887.1	844.1
2005	420000	421000	0.004776	1	0.2936	2884	499.302	2170.4	11139	461.3	1963	671.3	439.2	887.1	844.1
2005	420000	421100	0.00339229	1	0.2808	2781.5	380.839	2170.4	11139	461.3	1963	671.3	439.2	887.1	844.1
2005	420000	421200	0.00441848	1	0.29155	2622.5	386.25	2170.4	11139	461.3	1963	671.3	439.2	887.1	844.1
2005	420000	421300	0.00281766	1	0.2881	2557	416.091	2170.4	11139	461.3	1963	671.3	439.2	887.1	844.1
2005	430000	430100	0.0196174	1	0.2857	2938	525.433	2170.4	11139	461.3	1963	671.3	439.2	887.1	844.1
2005	430000	430200	0.00931721	1	0.25615	2809.5	441.182	2170.4	11139	461.3	1963	671.3	439.2	887.1	844.1
2005	430000	430300	0.0094678	1	0.2995	2549	347.13	2170.4	11139	461.3	1963	671.3	439.2	887.1	844.1
2005	430000	430400	0.00436616	1	0.29045	2760.5	514.287	2170.4	11139	461.3	1963	671.3	439.2	887.1	844.1
2005	430000	430500	0.00432387	1	0.2554	2634.5	339.836	2170.4	11139	461.3	1963	671.3	439.2	887.1	844.1
2005	430000	430600	0.00585497	1	0.2979	2837	530.945	2170.4	11139	461.3	1963	671.3	439.2	887.1	844.1
2005	430000	430700	0.00556478	1	0.2849	2912	526.834	2170.4	11139	461.3	1963	671.3	439.2	887.1	844.1
2005	430000	430800	0.00638958	1	0.26565	2912	468.048	2170.4	11139	461.3	1963	671.3	439.2	887.1	844.1
2005	430000	430900	0.00591197	1	0.2932	2747	421.322	2170.4	11139	461.3	1963	671.3	439.2	887.1	844.1
2005	430000	431000	0.0052464	1	0.2662	2908.5	464.771	2170.4	11139	461.3	1963	671.3	439.2	887.1	844.1
2005	430000	431100	0.0026557	1	0.2707	2970.5	424.633	2170.4	11139	461.3	1963	671.3	439.2	887.1	844.1
2005	430000	431200	0.00490153	1	0.2712	2997.5	388.928	2170.4	11139	461.3	1963	671.3	439.2	887.1	844.1
2005	430000	431300	0.00461869	1	0.26025	2884.5	548.436	2170.4	11139	461.3	1963	671.3	439.2	887.1	844.1
2004	310000	310000	0.0569902	1	#N/A		#N/A	1889.2	9842	406	1934	608.7	393.1	700.3	795.8
2004	320000	320100	0.0221286	1	0.282096	2822.4	494.922	1889.2	9842	406	1934	608.7	393.1	700.3	795.8
2004	320000	320200	0.023824	1	0.280176	2497.92	435.907	1889.2	9842	406	1934	608.7	393.1	700.3	795.8
2004	320000	320300	0.00464179	1	0.259296	2570.88	460.055	1889.2	9842	406	1934	608.7	393.1	700.3	795.8
2004	320000	320400	0.0156433	1	0.261168	2455.68	397.691	1889.2	9842	406	1934	608.7	393.1	700.3	795.8
2004	320000	320500	0.0233108	1	0.273456	2547.84	362.374	1889.2	9842	406	1934	608.7	393.1	700.3	795.8
2004	320000	320600	0.0109561	1	0.246	2642.4	426.552	1889.2	9842	406	1934	608.7	393.1	700.3	795.8
2004	320000	320700	0.00483639	1	0.259776	2647.2	401.392	1889.2	9842	406	1934	608.7	393.1	700.3	795.8
2004	320000	320800	0.00495563	1	0.255936	2798.4	366.582	1889.2	9842	406	1934	608.7	393.1	700.3	795.8
2004	320000	320900	0.00574243	1	0.260112	2624.64	524.313	1889.2	9842	406	1934	608.7	393.1	700.3	795.8
2004	320000	321000	0.00998636	1	0.252768	2727.84	467.945	1889.2	9842	406	1934	608.7	393.1	700.3	795.8
2004	320000	321100	0.0122327	1	0.256128	2430.24	415.817	1889.2	9842	406	1934	608.7	393.1	700.3	795.8
2004	320000	321200	0.00955411	1	0.26496	2460.48	406.428	1889.2	9842	406	1934	608.7	393.1	700.3	795.8
2004	320000	321300	0.00275987	1	0.251088	2461.92	472.893	1889.2	9842	406	1934	608.7	393.1	700.3	795.8
2004	330000	330100	0.0268258	1	0.2496	2592.48	364.587	2170.4	11139	461.3	1963	671.3	439.2	887.1	844.1
2004	330000	330200	0.0268597	1	0.269664	2585.76	380.94	2170.4	11139	461.3	1963	671.3	439.2	887.1	844.1
2004	330000	330300	0.0179828	1	0.244896	2626.08	464.042	2170.4	11139	461.3	1963	671.3	439.2	887.1	844.1
2004	330000	330400	0.0191766	1	0.2772	2828.16	418.14	2170.4	11139	461.3	1963	671.3	439.2	887.1	844.1
2004	330000	330500	0.0135989	1	0.281424	2542.56	477.165	2170.4	11139	461.3	1963	671.3	439.2	887.1	844.1
2004	330000	330600	0.0131549	1	0.26448	2562.24	473.472	2170.4	11139	461.3	1963	671.3	439.2	887.1	844.1
2004	330000	330700	0.0156955	1	0.266928	2806.08	368.64	2170.4	11139	461.3	1963	671.3	439.2	887.1	844.1
2004	330000	330800	0.00976335	1	0.250464	2467.68	352.007	2170.4	11139	461.3	1963	671.3	439.2	887.1	844.1
2004	330000	330900	0.0238293	1	0.254304	2470.56	464.077	2170.4	11139	461.3	1963	671.3	439.2	887.1	844.1
2004	330000	331000	0.0185626	1	0.277152	2798.4	549.336	2170.4	11139	461.3	1963	671.3	439.2	887.1	844.1
2004	330000	331100	0.0101258	1	0.243888	2731.68	446.774	2170.4	11139	461.3	1963	671.3	439.2	887.1	844.1
2004	340000	340100	0.0162515	1	0.181392	1785.12	328.497	1889.2	9842	406	1934	608.7	393.1	700.3	795.8
2004	340000	340181	0.0029384	1	#N/A	#N/A	#N/A	1889.2	9842	406	1934	608.7	393.1	700.3	795.8
2004	340000	340200	0.0109413	1	0.172608	1848.48	310.556	1889.2	9842	406	1934	608.7	393.1	700.3	795.8
2004	340000	340300	0.00627867	1	0.185136	1524.48	234.944	1889.2	9842	406	1934	608.7	393.1	700.3	795.8
2004	340000	340400	0.0065404	1	0.150624	1849.92	365.543	1889.2	9842	406	1934	608.7	393.1	700.3	795.8
2004	340000	340500	0.0128107	1	0.185664	1728.96	253.739	1889.2	9842	406	1934	608.7	393.1	700.3	795.8
2004	340000	340600	0.00471833	1	0.158112	1449.12	202.514	1889.2	9842	406	1934	608.7	393.1	700.3	795.8
2004	340000	340700	0.0130221	1	0.160608	1907.04	278.25	1889.2	9842	406	1934	608.7	393.1	700.3	795.8
2004	340000	340800	0.00412783	1	0.175296	1652.64	235.049	1889.2	9842	406	1934	608.7	393.1	700.3	795.8
2004	340000	341000	0.00717302	1	0.159408	1521.12	256.931	1889.2	9842	406	1934	608.7	393.1	700.3	795.8
2004	340000	341100	0.00555596	1	0.187584	1467.36	193.55	1889.2	9842	406	1934	608.7	393.1	700.3	795.8
2004	340000	341200	0.00223503	1	0.164976	1454.4	240.418	1889.2	9842	406	1934	608.7	393.1	700.3	795.8
2004	340000	341300	0.00326087	1	0.181248	1511.52	309.3	1889.2	9842	406	1934	608.7	393.1	700.3	795.8
2004	340000	341500	0.00203658	1	0.17568	1712.64	253.806	1889.2	9842	406	1934	608.7	393.1	700.3	795.8
2004	340000	341600	0.00243221	1	0.18264	1707.84	296.66	1889.2	9842	406	1934	608.7	393.1	700.3	795.8
2004	340000	341700	0.00478869	1	0.148368	1619.04	262.658	1889.2	9842	406	1934	608.7	393.1	700.3	795.8
2004	340000	341800	0.00537147	1	0.15792	1670.88	321.627	1889.2	9842	406	1934	608.7	393.1	700.3	795.8
2004	360000	360100	0.0181643	1	0.155664	1790.4	329.599	1889.2	9842	406	1934	608.7	393.1	700.3	795.8
2004	360000	360200	0.00805426	1	0.158016	1460.16	197.186	1889.2	9842	406	1934	608.7	393.1	700.3	795.8
2004	360000	360300	0.00668961	1	0.180144	1474.08	271.581	1889.2	9842	406	1934	608.7	393.1	700.3	795.8
2004	360000	360400	0.00422221	1	0.149328	1599.84	307.499	1889.2	9842	406	1934	608.7	393.1	700.3	795.8
2004	360000	360500	0.0103809	1	0.148128	1625.76	251.707	1889.2	9842	406	1934	608.7	393.1	700.3	795.8
2004	360000	360600	0.00586636	1	0.1548	1627.68	224.008	1889.2	9842	406	1934	608.7	393.1	700.3	795.8
2004	360000	360700	0.00412766	1	0.166992	1761.12	357.565	1889.2	9842	406	1934	608.7	393.1	700.3	795.8
2004	360000	360800	0.00360818	1	0.162144	1879.68	284.992	1889.2	9842	406	1934	608.7	393.1	700.3	795.8
2004	360000	360900	0.00518065	1	0.14904	1732.32	258.001	1889.2	9842	406	1934	608.7	393.1	700.3	795.8
2004	360000	361000	0.00575675	1	0.157872	1728.48	237.654	1889.2	9842	406	1934	608.7	393.1	700.3	795.8
2004	360000	361100	0.00415126	1	0.178224	1459.68	240.761	1889.2	9842	406	1934	608.7	393.1	700.3	795.8
2004	420000	420100	0.0237628	1	0.241872	2770.08	378.467	1889.2	9842	406	1934	608.7	393.1	700.3	795.8
2004	420000	420200	0.00834698	1	0.260688	2603.52	435.593	1889.2	9842	406	1934	608.7	393.1	700.3	795.8
2004	420000	420300	0.00381964	1	0.25776	2499.36	345.406	1889.2	9842	406	1934	608.7	393.1	700.3	795.8
2004	420000	420500	0.00655127	1	0.275904	2770.08	397.637	1889.2	9842	406	1934	608.7	393.1	700.3	795.8
2004	420000	420600	0.00527956	1	0.259824	2522.4	357.963	1889.2	9842	406	1934	608.7	393.1	700.3	795.8
2004	420000	420700	0.00534442	1	0.286416	2779.68	452.106	1889.2	9842	406	1934	608.7	393.1	700.3	795.8
2004	420000	420800	0.00455164	1	0.254592	2657.28	409.921	1889.2	9842	406	1934	608.7	393.1	700.3	795.8
2004	420000	420900	0.00264528	1	0.27336	2638.08	426.43	1889.2	9842	406	1934	608.7	393.1	700.3	795.8
2004	420000	421000	0.00410858	1	0.278064	2551.2	368.732	1889.2	9842	406	1934	608.7	393.1	700.3	795.8
2004	420000	421100	0.00218132	1	0.243888	2614.56	396.978	1889.2	9842	406	1934	608.7	393.1	700.3	795.8
2004	420000	421200	0.00403083	1	0.241728	2570.88	427.348	1889.2	9842	406	1934	608.7	393.1	700.3	795.8
2004	420000	421300	0.00252126	1	0.265824	2454.72	417.113	1889.2	9842	406	1934	608.7	393.1	700.3	795.8
2004	430000	430100	0.0174845	1	0.271632	2419.68	356.418	1889.2	9842	406	1934	608.7	393.1	700.3	795.8
2004	430000	430200	0.00853254	1	0.274944	2757.12	513.72	1889.2	9842	406	1934	608.7	393.1	700.3	795.8
2004	430000	430300	0.00869619	1	0.258048	2779.2	502.856	1889.2	9842	406	1934	608.7	393.1	700.3	795.8
2004	430000	430400	0.00423142	1	0.246336	2734.08	449.037	1889.2	9842	406	1934	608.7	393.1	700.3	795.8
2004	430000	430500	0.00411102	1	0.28416	2661.6	385.399	1889.2	9842	406	1934	608.7	393.1	700.3	795.8
2004	430000	430600	0.00522678	1	0.241632	2852.16	497.929	1889.2	9842	406	1934	608.7	393.1	700.3	795.8
2004	430000	430700	0.00529039	1	0.251232	2866.56	498.197	1889.2	9842	406	1934	608.7	393.1	700.3	795.8
2004	430000	430800	0.00534937	1	0.261648	2466.24	336.011	1889.2	9842	406	1934	608.7	393.1	700.3	795.8
2004	430000	430900	0.00539846	1	0.259776	2704.32	446.504	1889.2	9842	406	1934	608.7	393.1	700.3	795.8
2004	430000	431000	0.00485298	1	0.26616	2772	465.092	1889.2	9842	406	1934	608.7	393.1	700.3	795.8
2004	430000	431100	0.00294873	1	0.272448	2787.84	351.08	1889.2	9842	406	1934	608.7	393.1	700.3	795.8
2004	430000	431200	0.00418056	1	0.280032	2572.32	472.651	1889.2	9842	406	1934	608.7	393.1	700.3	795.8
2004	430000	431300	0.00419178	1	0.25296	2821.44	363.097	1889.2	9842	406	1934	608.7	393.1	700.3	795.8
2003	310000	310000	0.0551915	1	#N/A		#N/A	1612.6	8457	409.8	1905	600.7	290.4	589.2	733
2003	320000	320100	0.0290651	1	0.26841	2727.8	400.994	1612.6	8457	409.8	1905	600.7	290.4	589.2	733
2003	320000	320200	0.0253809	1	0.266984	2455.48	348.316	1612.6	8457	409.8	1905	600.7	290.4	589.2	733
2003	320000	320300	0.00486023	1	0.249504	2703.88	435.51	1612.6	8457	409.8	1905	600.7	290.4	589.2	733
2003	320000	320400	0.0175267	1	0.25369	2662.94	398.161	1612.6	8457	409.8	1905	600.7	290.4	589.2	733
2003	320000	320500	0.0267863	1	0.263396	2518.96	326.469	1612.6	8457	409.8	1905	600.7	290.4	589.2	733
2003	320000	320600	0.00691161	1	0.244122	2501.02	443.651	1612.6	8457	409.8	1905	600.7	290.4	589.2	733
2003	320000	320700	0.0047577	1	0.24955	2484.46	433.696	1612.6	8457	409.8	1905	600.7	290.4	589.2	733
2003	320000	320800	0.00497945	1	0.231656	2707.56	432.47	1612.6	8457	409.8	1905	600.7	290.4	589.2	733
2003	320000	320900	0.00524964	1	0.253506	2351.98	455.632	1612.6	8457	409.8	1905	600.7	290.4	589.2	733
2003	320000	321000	0.0110484	1	0.248032	2342.78	340.389	1612.6	8457	409.8	1905	600.7	290.4	589.2	733
2003	320000	321100	0.0143522	1	0.25484	2587.96	475.415	1612.6	8457	409.8	1905	600.7	290.4	589.2	733
2003	320000	321200	0.00778046	1	0.263258	2461.46	359.983	1612.6	8457	409.8	1905	600.7	290.4	589.2	733
2003	320000	321300	0.00148198	1	0.248722	2622.92	351.942	1612.6	8457	409.8	1905	600.7	290.4	589.2	733
2003	330000	330100	0.02892	1	0.235796	2564.04	521.255	1889.2	9842	406	1934	608.7	393.1	700.3	795.8
2003	330000	330200	0.0288009	1	0.257922	2531.84	391.29	1889.2	9842	406	1934	608.7	393.1	700.3	795.8
2003	330000	330300	0.0207372	1	0.266064	2452.72	343.852	1889.2	9842	406	1934	608.7	393.1	700.3	795.8
2003	330000	330400	0.0181549	1	0.245732	2641.32	426.174	1889.2	9842	406	1934	608.7	393.1	700.3	795.8
2003	330000	330500	0.0138383	1	0.273976	2560.36	358.612	1889.2	9842	406	1934	608.7	393.1	700.3	795.8
2003	330000	330600	0.0176073	1	0.258934	2405.34	397.417	1889.2	9842	406	1934	608.7	393.1	700.3	795.8
2003	330000	330700	0.017763	1	0.230552	2627.52	349.286	1889.2	9842	406	1934	608.7	393.1	700.3	795.8
2003	330000	330800	0.0101329	1	0.265834	2737.46	418.57	1889.2	9842	406	1934	608.7	393.1	700.3	795.8
2003	330000	330900	0.0229146	1	0.246468	2399.82	347.821	1889.2	9842	406	1934	608.7	393.1	700.3	795.8
2003	330000	331000	0.0167625	1	0.274482	2420.98	425.102	1889.2	9842	406	1934	608.7	393.1	700.3	795.8
2003	330000	331100	0.00951028	1	0.23115	2726.42	444.435	1889.2	9842	406	1934	608.7	393.1	700.3	795.8
2003	340000	340100	0.0203587	1	0.146188	1391.5	215.909	1612.6	8457	409.8	1905	600.7	290.4	589.2	733
2003	340000	340181	0.00288108	1	#N/A	#N/A	#N/A	1612.6	8457	409.8	1905	600.7	290.4	589.2	733
2003	340000	340200	0.00985109	1	0.166842	1832.18	311.619	1612.6	8457	409.8	1905	600.7	290.4	589.2	733
2003	340000	340300	0.00604091	1	0.139794	1694.18	227.563	1612.6	8457	409.8	1905	600.7	290.4	589.2	733
2003	340000	340400	0.0058517	1	0.150972	1555.72	208.197	1612.6	8457	409.8	1905	600.7	290.4	589.2	733
2003	340000	340500	0.00935712	1	0.147982	1736.5	213.961	1612.6	8457	409.8	1905	600.7	290.4	589.2	733
2003	340000	340600	0.0035969	1	0.14996	1420.02	267.236	1612.6	8457	409.8	1905	600.7	290.4	589.2	733
2003	340000	340700	0.015648	1	0.157734	1408.06	244.667	1612.6	8457	409.8	1905	600.7	290.4	589.2	733
2003	340000	340800	0.0038685	1	0.14628	1832.18	227.48	1612.6	8457	409.8	1905	600.7	290.4	589.2	733
2003	340000	341000	0.00816633	1	0.152996	1533.64	202.463	1612.6	8457	409.8	1905	600.7	290.4	589.2	733
2003	340000	341100	0.00403291	1	0.145728	1821.14	315.795	1612.6	8457	409.8	1905	600.7	290.4	589.2	733
2003	340000	341200	0.00145883	1	0.156952	1421.86	239.251	1612.6	8457	409.8	1905	600.7	290.4	589.2	733
2003	340000	341300	0.00268287	1	0.147062	1564.46	262.72	1612.6	8457	409.8	1905	600.7	290.4	589.2	733
2003	340000	341500	0.00164407	1	0.142876	1632.08	251.921	1612.6	8457	409.8	1905	600.7	290.4	589.2	733
2003	340000	341600	0.00177602	1	0.180458	1585.62	274.336	1612.6	8457	409.8	1905	600.7	290.4	589.2	733
2003	340000	341700	0.004427	1	0.14375	1616.44	245.527	1612.6	8457	409.8	1905	600.7	290.4	589.2	733
2003	340000	341800	0.00457108	1	0.16238	1446.24	216.124	1612.6	8457	409.8	1905	600.7	290.4	589.2	733
2003	360000	360100	0.0195024	1	0.165002	1526.74	221.579	1612.6	8457	409.8	1905	600.7	290.4	589.2	733
2003	360000	360200	0.00989594	1	0.14697	1736.04	291.509	1612.6	8457	409.8	1905	600.7	290.4	589.2	733
2003	360000	360300	0.00868147	1	0.154514	1631.16	222.393	1612.6	8457	409.8	1905	600.7	290.4	589.2	733
2003	360000	360400	0.00533855	1	0.168774	1543.76	222.032	1612.6	8457	409.8	1905	600.7	290.4	589.2	733
2003	360000	360500	0.00791606	1	0.152076	1656.92	239.765	1612.6	8457	409.8	1905	600.7	290.4	589.2	733
2003	360000	360600	0.00621124	1	0.17181	1472	241.514	1612.6	8457	409.8	1905	600.7	290.4	589.2	733
2003	360000	360700	0.0046923	1	0.144348	1771.92	299.589	1612.6	8457	409.8	1905	600.7	290.4	589.2	733
2003	360000	360800	0.00357102	1	0.156998	1579.18	241.156	1612.6	8457	409.8	1905	600.7	290.4	589.2	733
2003	360000	360900	0.0052742	1	0.14651	1659.22	284.59	1612.6	8457	409.8	1905	600.7	290.4	589.2	733
2003	360000	361000	0.00630619	1	0.153272	1569.52	260.42	1612.6	8457	409.8	1905	600.7	290.4	589.2	733
2003	360000	361100	0.00414479	1	0.17917	1400.7	257.604	1612.6	8457	409.8	1905	600.7	290.4	589.2	733
2003	420000	420100	0.0240565	1	0.250378	2634.42	407.661	1612.6	8457	409.8	1905	600.7	290.4	589.2	733
2003	420000	420200	0.00968361	1	0.252632	2414.54	363.825	1612.6	8457	409.8	1905	600.7	290.4	589.2	733
2003	420000	420300	0.00381177	1	0.257876	2748.04	390.086	1612.6	8457	409.8	1905	600.7	290.4	589.2	733
2003	420000	420500	0.00667656	1	0.252402	2478.94	405.19	1612.6	8457	409.8	1905	600.7	290.4	589.2	733
2003	420000	420600	0.00482195	1	0.236578	2450.42	480.74	1612.6	8457	409.8	1905	600.7	290.4	589.2	733
2003	420000	420700	0.00548218	1	0.242972	2576.92	431.284	1612.6	8457	409.8	1905	600.7	290.4	589.2	733
2003	420000	420800	0.00433123	1	0.261418	2372.68	423.711	1612.6	8457	409.8	1905	600.7	290.4	589.2	733
2003	420000	420900	0.003149	1	0.27048	2689.62	378.035	1612.6	8457	409.8	1905	600.7	290.4	589.2	733
2003	420000	421000	0.00400207	1	0.245778	2669.84	437.934	1612.6	8457	409.8	1905	600.7	290.4	589.2	733
2003	420000	421100	0.00195174	1	0.235428	2323.92	290.432	1612.6	8457	409.8	1905	600.7	290.4	589.2	733
2003	420000	421200	0.00480495	1	0.246928	2695.6	369.351	1612.6	8457	409.8	1905	600.7	290.4	589.2	733
2003	420000	421300	0.00298968	1	0.248492	2309.2	350.929	1612.6	8457	409.8	1905	600.7	290.4	589.2	733
2003	430000	430100	0.0225006	1	0.264868	2650.06	410.649	1612.6	8457	409.8	1905	600.7	290.4	589.2	733
2003	430000	430200	0.00911594	1	0.266202	2710.32	364.247	1612.6	8457	409.8	1905	600.7	290.4	589.2	733
2003	430000	430300	0.00892784	1	0.233496	2464.68	408.513	1612.6	8457	409.8	1905	600.7	290.4	589.2	733
2003	430000	430400	0.00433458	1	0.263258	2312.88	358.542	1612.6	8457	409.8	1905	600.7	290.4	589.2	733
2003	430000	430500	0.00423789	1	0.236624	2610.04	369.969	1612.6	8457	409.8	1905	600.7	290.4	589.2	733
2003	430000	430600	0.00585117	1	0.24196	2603.6	449.71	1612.6	8457	409.8	1905	600.7	290.4	589.2	733
2003	430000	430700	0.00447846	1	0.232484	2346	461.963	1612.6	8457	409.8	1905	600.7	290.4	589.2	733
2003	430000	430800	0.00736582	1	0.24127	2480.78	367.746	1612.6	8457	409.8	1905	600.7	290.4	589.2	733
2003	430000	430900	0.00563048	1	0.244444	2517.58	459.576	1612.6	8457	409.8	1905	600.7	290.4	589.2	733
2003	430000	431000	0.005195	1	0.239706	2388.78	348.941	1612.6	8457	409.8	1905	600.7	290.4	589.2	733
2003	430000	431100	0.00266936	1	0.25438	2691.46	351.833	1612.6	8457	409.8	1905	600.7	290.4	589.2	733
2003	430000	431200	0.00423759	1	0.253414	2432.94	382.545	1612.6	8457	409.8	1905	600.7	290.4	589.2	733
2003	430000	431300	0.00415518	1	0.262982	2366.24	399.697	1612.6	8457	409.8	1905	600.7	290.4	589.2	733
2002	310000	310000	0.0273548	1	#N/A		#N/A	1491.6	7945	365.1	1876	541.1	274.3	560.5	656.7
2002	320000	320100	0.00705511	1	0.240548	2316.16	313.501	1491.6	7945	365.1	1876	541.1	274.3	560.5	656.7
2002	320000	320200	0.0127588	1	0.257224	2579.28	463.982	1491.6	7945	365.1	1876	541.1	274.3	560.5	656.7
2002	320000	320300	0.00250767	1	0.223432	2471.48	443.545	1491.6	7945	365.1	1876	541.1	274.3	560.5	656.7
2002	320000	320400	0.00967703	1	0.251768	2632.96	385.445	1491.6	7945	365.1	1876	541.1	274.3	560.5	656.7
2002	320000	320500	0.0134566	1	0.260744	2526.48	462.399	1491.6	7945	365.1	1876	541.1	274.3	560.5	656.7
2002	320000	320600	0.00533494	1	0.25784	2515.04	416.466	1491.6	7945	365.1	1876	541.1	274.3	560.5	656.7
2002	320000	320700	0.00205006	1	0.24882	2392.28	471.033	1491.6	7945	365.1	1876	541.1	274.3	560.5	656.7
2002	320000	320800	0.00177272	1	0.24288	2281.84	412.321	1491.6	7945	365.1	1876	541.1	274.3	560.5	656.7
2002	320000	320900	0.00265253	1	0.247016	2564.32	450.978	1491.6	7945	365.1	1876	541.1	274.3	560.5	656.7
2002	320000	321000	0.00499399	1	0.255992	2421.32	452.325	1491.6	7945	365.1	1876	541.1	274.3	560.5	656.7
2002	320000	321100	0.00877733	1	0.245256	2558.16	459.413	1491.6	7945	365.1	1876	541.1	274.3	560.5	656.7
2002	320000	321200	0.00511211	1	0.252252	2597.76	445.108	1491.6	7945	365.1	1876	541.1	274.3	560.5	656.7
2002	320000	321300	0.00120686	1	0.242352	2456.96	410.783	1491.6	7945	365.1	1876	541.1	274.3	560.5	656.7
2002	330000	330100	0.0109792	1	0.224664	2465.32	302.081	1612.6	8457	409.8	1905	600.7	290.4	589.2	733
2002	330000	330200	0.0130947	1	0.230692	2539.68	438.711	1612.6	8457	409.8	1905	600.7	290.4	589.2	733
2002	330000	330300	0.00881414	1	0.261228	2274.8	412.417	1612.6	8457	409.8	1905	600.7	290.4	589.2	733
2002	330000	330400	0.0087437	1	0.233508	2413.4	400.423	1612.6	8457	409.8	1905	600.7	290.4	589.2	733
2002	330000	330500	0.00619118	1	0.233332	2218.92	410.094	1612.6	8457	409.8	1905	600.7	290.4	589.2	733
2002	330000	330600	0.00837556	1	0.229812	2328.04	368.293	1612.6	8457	409.8	1905	600.7	290.4	589.2	733
2002	330000	330700	0.00932507	1	0.242132	2221.56	415.071	1612.6	8457	409.8	1905	600.7	290.4	589.2	733
2002	330000	330800	0.00449211	1	0.246664	2620.64	416.403	1612.6	8457	409.8	1905	600.7	290.4	589.2	733
2002	330000	330900	0.0107991	1	0.228492	2542.76	351.89	1612.6	8457	409.8	1905	600.7	290.4	589.2	733
2002	330000	331000	0.00883075	1	0.256168	2357.52	325.218	1612.6	8457	409.8	1905	600.7	290.4	589.2	733
2002	330000	331100	0.00391812	1	0.261888	2342.12	432.327	1612.6	8457	409.8	1905	600.7	290.4	589.2	733
2002	340000	340100	0.0069137	1	0.15158	1581.8	271.899	1491.6	7945	365.1	1876	541.1	274.3	560.5	656.7
2002	340000	340181	0.00177633	1	#N/A	#N/A	#N/A	1491.6	7945	365.1	1876	541.1	274.3	560.5	656.7
2002	340000	340200	0.00519478	1	0.174768	1730.52	349.407	1491.6	7945	365.1	1876	541.1	274.3	560.5	656.7
2002	340000	340300	0.0032466	1	0.154308	1555.4	298.178	1491.6	7945	365.1	1876	541.1	274.3	560.5	656.7
2002	340000	340400	0.0035532	1	0.169884	1469.16	230.187	1491.6	7945	365.1	1876	541.1	274.3	560.5	656.7
2002	340000	340500	0.00437396	1	0.140756	1525.92	221.483	1491.6	7945	365.1	1876	541.1	274.3	560.5	656.7
2002	340000	340600	0.00134337	1	0.162624	1650.88	234.54	1491.6	7945	365.1	1876	541.1	274.3	560.5	656.7
2002	340000	340700	0.00720589	1	0.139744	1510.08	300.244	1491.6	7945	365.1	1876	541.1	274.3	560.5	656.7
2002	340000	340800	0.00197767	1	0.175648	1688.28	266.606	1491.6	7945	365.1	1876	541.1	274.3	560.5	656.7
2002	340000	341000	0.00345197	1	0.137456	1444.52	226.209	1491.6	7945	365.1	1876	541.1	274.3	560.5	656.7
2002	340000	341100	0.00130918	1	0.151536	1741.52	284.542	1491.6	7945	365.1	1876	541.1	274.3	560.5	656.7
2002	340000	341200	0.000720855	1	0.16302	1530.32	234.952	1491.6	7945	365.1	1876	541.1	274.3	560.5	656.7
2002	340000	341300	0.00119463	1	0.14498	1441.88	230.875	1491.6	7945	365.1	1876	541.1	274.3	560.5	656.7
2002	340000	341500	0.00077122	1	0.152592	1582.68	258.759	1491.6	7945	365.1	1876	541.1	274.3	560.5	656.7
2002	340000	341600	0.000810884	1	0.158268	1621.4	273.14	1491.6	7945	365.1	1876	541.1	274.3	560.5	656.7
2002	340000	341700	0.00285534	1	0.146652	1716	301.644	1491.6	7945	365.1	1876	541.1	274.3	560.5	656.7
2002	340000	341800	0.00151884	1	0.166848	1713.8	277.517	1491.6	7945	365.1	1876	541.1	274.3	560.5	656.7
2002	360000	360100	0.00972545	1	0.15884	1347.28	280.127	1491.6	7945	365.1	1876	541.1	274.3	560.5	656.7
2002	360000	360200	0.00541101	1	0.142296	1345.96	248.583	1491.6	7945	365.1	1876	541.1	274.3	560.5	656.7
2002	360000	360300	0.00381262	1	0.174328	1324.4	182.099	1491.6	7945	365.1	1876	541.1	274.3	560.5	656.7
2002	360000	360400	0.00307657	1	0.148896	1333.2	226.237	1491.6	7945	365.1	1876	541.1	274.3	560.5	656.7
2002	360000	360500	0.00363279	1	0.1727	1543.08	228.741	1491.6	7945	365.1	1876	541.1	274.3	560.5	656.7
2002	360000	360600	0.0038364	1	0.171468	1422.08	264.167	1491.6	7945	365.1	1876	541.1	274.3	560.5	656.7
2002	360000	360700	0.00195732	1	0.171952	1643.4	279.293	1491.6	7945	365.1	1876	541.1	274.3	560.5	656.7
2002	360000	360800	0.00271408	1	0.164956	1378.08	239.392	1491.6	7945	365.1	1876	541.1	274.3	560.5	656.7
2002	360000	360900	0.00137828	1	0.174196	1532.96	317.403	1491.6	7945	365.1	1876	541.1	274.3	560.5	656.7
2002	360000	361000	0.00293032	1	0.140228	1404.48	228.755	1491.6	7945	365.1	1876	541.1	274.3	560.5	656.7
2002	360000	361100	0.00210982	1	0.156992	1516.68	212.515	1491.6	7945	365.1	1876	541.1	274.3	560.5	656.7
2002	420000	420100	0.0091068	1	0.245344	2317.92	295.006	1491.6	7945	365.1	1876	541.1	274.3	560.5	656.7
2002	420000	420200	0.00359561	1	0.257136	2311.32	378.968	1491.6	7945	365.1	1876	541.1	274.3	560.5	656.7
2002	420000	420300	0.00130792	1	0.251636	2328.92	398.433	1491.6	7945	365.1	1876	541.1	274.3	560.5	656.7
2002	420000	420500	0.00267178	1	0.234916	2400.64	437.853	1491.6	7945	365.1	1876	541.1	274.3	560.5	656.7
2002	420000	420600	0.00159418	1	0.256432	2251.92	341.414	1491.6	7945	365.1	1876	541.1	274.3	560.5	656.7
2002	420000	420700	0.00278837	1	0.23364	2527.8	429.324	1491.6	7945	365.1	1876	541.1	274.3	560.5	656.7
2002	420000	420800	0.00162606	1	0.256696	2345.2	347.477	1491.6	7945	365.1	1876	541.1	274.3	560.5	656.7
2002	420000	420900	0.00143996	1	0.248952	2409.88	309.315	1491.6	7945	365.1	1876	541.1	274.3	560.5	656.7
2002	420000	421000	0.00207328	1	0.245828	2294.6	440.186	1491.6	7945	365.1	1876	541.1	274.3	560.5	656.7
2002	420000	421100	0.000947028	1	0.235884	2631.2	387.048	1491.6	7945	365.1	1876	541.1	274.3	560.5	656.7
2002	420000	421200	0.00190409	1	0.238348	2363.24	334.642	1491.6	7945	365.1	1876	541.1	274.3	560.5	656.7
2002	420000	421300	0.00102534	1	0.23738	2405.92	412.541	1491.6	7945	365.1	1876	541.1	274.3	560.5	656.7
2002	430000	430100	0.0132508	1	0.253792	2346.96	420.615	1491.6	7945	365.1	1876	541.1	274.3	560.5	656.7
2002	430000	430200	0.00474677	1	0.234432	2548.04	331.907	1491.6	7945	365.1	1876	541.1	274.3	560.5	656.7
2002	430000	430300	0.00507981	1	0.263296	2522.52	322.504	1491.6	7945	365.1	1876	541.1	274.3	560.5	656.7
2002	430000	430400	0.00218825	1	0.251636	2625.92	521.623	1491.6	7945	365.1	1876	541.1	274.3	560.5	656.7
2002	430000	430500	0.00192262	1	0.254276	2333.32	314.395	1491.6	7945	365.1	1876	541.1	274.3	560.5	656.7
2002	430000	430600	0.00300687	1	0.249876	2534.84	442.821	1491.6	7945	365.1	1876	541.1	274.3	560.5	656.7
2002	430000	430700	0.0034694	1	0.259644	2611.84	331.443	1491.6	7945	365.1	1876	541.1	274.3	560.5	656.7
2002	430000	430800	0.0022027	1	0.257444	2368.52	401.764	1491.6	7945	365.1	1876	541.1	274.3	560.5	656.7
2002	430000	430900	0.0014738	1	0.253528	2626.36	371.829	1491.6	7945	365.1	1876	541.1	274.3	560.5	656.7
2002	430000	431000	0.00176099	1	0.25718	2294.16	334.197	1491.6	7945	365.1	1876	541.1	274.3	560.5	656.7
2002	430000	431100	0.00140659	1	0.260568	2439.8	458.693	1491.6	7945	365.1	1876	541.1	274.3	560.5	656.7
2002	430000	431200	0.00151076	1	0.250536	2315.72	400.834	1491.6	7945	365.1	1876	541.1	274.3	560.5	656.7
2002	430000	431300	0.00167156	1	0.263692	2394.04	409.455	1491.6	7945	365.1	1876	541.1	274.3	560.5	656.7
2001	310000	310000	0.0201437	1	#N/A		#N/A	1363.6	7372	330.2	1849	490.2	274.4	525	564.2
2001	320000	320100	0.0135824	1	0.213528	2408.7	437.02	1363.6	7372	330.2	1849	490.2	274.4	525	564.2
2001	320000	320200	0.0193663	1	0.215628	2171.4	331.398	1363.6	7372	330.2	1849	490.2	274.4	525	564.2
2001	320000	320300	0.00331066	1	0.251286	2377.62	376.637	1363.6	7372	330.2	1849	490.2	274.4	525	564.2
2001	320000	320400	0.0129812	1	0.225036	2311.26	380.319	1363.6	7372	330.2	1849	490.2	274.4	525	564.2
2001	320000	320500	0.0216026	1	0.21756	2480.94	426.898	1363.6	7372	330.2	1849	490.2	274.4	525	564.2
2001	320000	320600	0.00659708	1	0.243012	2367.12	421.8	1363.6	7372	330.2	1849	490.2	274.4	525	564.2
2001	320000	320700	0.00309137	1	0.21735	2404.92	312.673	1363.6	7372	330.2	1849	490.2	274.4	525	564.2
2001	320000	320800	0.00250184	1	0.235788	2219.28	324.117	1363.6	7372	330.2	1849	490.2	274.4	525	564.2
2001	320000	320900	0.00255512	1	0.219198	2154.6	394.501	1363.6	7372	330.2	1849	490.2	274.4	525	564.2
2001	320000	321000	0.00589771	1	0.24234	2428.86	445.299	1363.6	7372	330.2	1849	490.2	274.4	525	564.2
2001	320000	321100	0.0110387	1	0.2499	2422.98	453.595	1363.6	7372	330.2	1849	490.2	274.4	525	564.2
2001	320000	321200	0.0064221	1	0.234024	2119.74	401.388	1363.6	7372	330.2	1849	490.2	274.4	525	564.2
2001	320000	321300	0.00136871	1	0.241626	2171.82	417.439	1363.6	7372	330.2	1849	490.2	274.4	525	564.2
2001	330000	330100	0.0108081	1	0.21693	2515.8	478.263	1491.6	7945	365.1	1876	541.1	274.3	560.5	656.7
2001	330000	330200	0.010749	1	0.234864	2113.02	296.963	1491.6	7945	365.1	1876	541.1	274.3	560.5	656.7
2001	330000	330300	0.0104298	1	0.221718	2102.52	319.368	1491.6	7945	365.1	1876	541.1	274.3	560.5	656.7
2001	330000	330400	0.00909742	1	0.211638	2241.54	408.384	1491.6	7945	365.1	1876	541.1	274.3	560.5	656.7
2001	330000	330500	0.00852003	1	0.224112	2433.48	405.836	1491.6	7945	365.1	1876	541.1	274.3	560.5	656.7
2001	330000	330600	0.00783692	1	0.251244	2371.74	439.55	1491.6	7945	365.1	1876	541.1	274.3	560.5	656.7
2001	330000	330700	0.0077068	1	0.227304	2267.16	400.186	1491.6	7945	365.1	1876	541.1	274.3	560.5	656.7
2001	330000	330800	0.00418229	1	0.226632	2177.28	401.199	1491.6	7945	365.1	1876	541.1	274.3	560.5	656.7
2001	330000	330900	0.0113356	1	0.218064	2296.98	333.444	1491.6	7945	365.1	1876	541.1	274.3	560.5	656.7
2001	330000	331000	0.00909353	1	0.225708	2105.46	370.176	1491.6	7945	365.1	1876	541.1	274.3	560.5	656.7
2001	330000	331100	0.00460912	1	0.24402	2462.88	417.506	1491.6	7945	365.1	1876	541.1	274.3	560.5	656.7
2001	340000	340100	0.00831791	1	0.153384	1340.22	184.017	1363.6	7372	330.2	1849	490.2	274.4	525	564.2
2001	340000	340181	0.00166383	1	#N/A	#N/A	#N/A	1363.6	7372	330.2	1849	490.2	274.4	525	564.2
2001	340000	340200	0.00597308	1	0.14952	1541.4	205.168	1363.6	7372	330.2	1849	490.2	274.4	525	564.2
2001	340000	340300	0.0032149	1	0.147294	1370.46	201.071	1363.6	7372	330.2	1849	490.2	274.4	525	564.2
2001	340000	340400	0.00385111	1	0.157164	1470.42	183.756	1363.6	7372	330.2	1849	490.2	274.4	525	564.2
2001	340000	340500	0.00516793	1	0.146916	1517.46	210.357	1363.6	7372	330.2	1849	490.2	274.4	525	564.2
2001	340000	340600	0.00107121	1	0.147126	1379.7	253.772	1363.6	7372	330.2	1849	490.2	274.4	525	564.2
2001	340000	340700	0.00683375	1	0.154392	1334.76	184.965	1363.6	7372	330.2	1849	490.2	274.4	525	564.2
2001	340000	340800	0.0021557	1	0.167328	1418.76	278.912	1363.6	7372	330.2	1849	490.2	274.4	525	564.2
2001	340000	341000	0.00282888	1	0.165354	1678.32	318.629	1363.6	7372	330.2	1849	490.2	274.4	525	564.2
2001	340000	341100	0.00158882	1	0.130746	1627.5	248.903	1363.6	7372	330.2	1849	490.2	274.4	525	564.2
2001	340000	341200	0.000659584	1	0.135996	1462.02	237.443	1363.6	7372	330.2	1849	490.2	274.4	525	564.2
2001	340000	341300	0.00106396	1	0.162414	1483.44	269.283	1363.6	7372	330.2	1849	490.2	274.4	525	564.2
2001	340000	341500	0.00075493	1	0.137382	1617.84	264.841	1363.6	7372	330.2	1849	490.2	274.4	525	564.2
2001	340000	341600	0.000955185	1	0.134988	1436.4	193.888	1363.6	7372	330.2	1849	490.2	274.4	525	564.2
2001	340000	341700	0.00266918	1	0.128478	1377.18	231.325	1363.6	7372	330.2	1849	490.2	274.4	525	564.2
2001	340000	341800	0.00186011	1	0.139734	1453.62	269.484	1363.6	7372	330.2	1849	490.2	274.4	525	564.2
2001	360000	360100	0.00984402	1	0.14259	1559.88	309.478	1363.6	7372	330.2	1849	490.2	274.4	525	564.2
2001	360000	360200	0.00471385	1	0.144018	1647.66	208.998	1363.6	7372	330.2	1849	490.2	274.4	525	564.2
2001	360000	360300	0.00291853	1	0.127806	1402.8	231.318	1363.6	7372	330.2	1849	490.2	274.4	525	564.2
2001	360000	360400	0.00369329	1	0.129108	1347.78	261.743	1363.6	7372	330.2	1849	490.2	274.4	525	564.2
2001	360000	360500	0.00319553	1	0.154182	1536.36	290.168	1363.6	7372	330.2	1849	490.2	274.4	525	564.2
2001	360000	360600	0.00429579	1	0.155232	1285.62	216.218	1363.6	7372	330.2	1849	490.2	274.4	525	564.2
2001	360000	360700	0.00175722	1	0.132216	1521.66	238.488	1363.6	7372	330.2	1849	490.2	274.4	525	564.2
2001	360000	360800	0.00184015	1	0.15141	1410.36	211.092	1363.6	7372	330.2	1849	490.2	274.4	525	564.2
2001	360000	360900	0.00183045	1	0.134358	1437.24	236.448	1363.6	7372	330.2	1849	490.2	274.4	525	564.2
2001	360000	361000	0.00249971	1	0.167706	1655.64	251.733	1363.6	7372	330.2	1849	490.2	274.4	525	564.2
2001	360000	361100	0.00178049	1	0.167202	1611.54	240.821	1363.6	7372	330.2	1849	490.2	274.4	525	564.2
2001	420000	420100	0.00996887	1	0.214536	2517.48	395.863	1363.6	7372	330.2	1849	490.2	274.4	525	564.2
2001	420000	420200	0.00260947	1	0.23667	2136.96	343.556	1363.6	7372	330.2	1849	490.2	274.4	525	564.2
2001	420000	420300	0.00130895	1	0.211386	2243.64	445.369	1363.6	7372	330.2	1849	490.2	274.4	525	564.2
2001	420000	420500	0.00307714	1	0.21294	2461.2	381.219	1363.6	7372	330.2	1849	490.2	274.4	525	564.2
2001	420000	420600	0.00181352	1	0.225708	2236.08	369.459	1363.6	7372	330.2	1849	490.2	274.4	525	564.2
2001	420000	420700	0.00248087	1	0.229824	2333.1	425.705	1363.6	7372	330.2	1849	490.2	274.4	525	564.2
2001	420000	420800	0.00113374	1	0.236796	2115.54	411.11	1363.6	7372	330.2	1849	490.2	274.4	525	564.2
2001	420000	420900	0.00123738	1	0.225372	2342.76	338.149	1363.6	7372	330.2	1849	490.2	274.4	525	564.2
2001	420000	421000	0.0019122	1	0.235368	2351.58	392.568	1363.6	7372	330.2	1849	490.2	274.4	525	564.2
2001	420000	421100	0.000654791	1	0.233856	2472.54	423.924	1363.6	7372	330.2	1849	490.2	274.4	525	564.2
2001	420000	421200	0.00160994	1	0.223818	2313.36	333.568	1363.6	7372	330.2	1849	490.2	274.4	525	564.2
2001	420000	421300	0.000840641	1	0.220416	2237.76	402.994	1363.6	7372	330.2	1849	490.2	274.4	525	564.2
2001	430000	430100	0.00935859	1	0.238854	2156.7	405.881	1363.6	7372	330.2	1849	490.2	274.4	525	564.2
2001	430000	430200	0.00496941	1	0.228102	2503.62	471.945	1363.6	7372	330.2	1849	490.2	274.4	525	564.2
2001	430000	430300	0.00690867	1	0.21693	2466.24	399.601	1363.6	7372	330.2	1849	490.2	274.4	525	564.2
2001	430000	430400	0.00258814	1	0.2121	2359.14	390.203	1363.6	7372	330.2	1849	490.2	274.4	525	564.2
2001	430000	430500	0.00144565	1	0.216552	2116.38	364.919	1363.6	7372	330.2	1849	490.2	274.4	525	564.2
2001	430000	430600	0.00256164	1	0.226002	2260.86	321.06	1363.6	7372	330.2	1849	490.2	274.4	525	564.2
2001	430000	430700	0.00214922	1	0.219072	2103.78	301.385	1363.6	7372	330.2	1849	490.2	274.4	525	564.2
2001	430000	430800	0.00202022	1	0.21672	2118.9	355.625	1363.6	7372	330.2	1849	490.2	274.4	525	564.2
2001	430000	430900	0.00146811	1	0.217686	2273.04	329.364	1363.6	7372	330.2	1849	490.2	274.4	525	564.2
2001	430000	431000	0.00184611	1	0.250824	2254.98	378.21	1363.6	7372	330.2	1849	490.2	274.4	525	564.2
2001	430000	431100	0.00149301	1	0.23751	2250.78	359.516	1363.6	7372	330.2	1849	490.2	274.4	525	564.2
2001	430000	431200	0.00109057	1	0.21126	2422.14	469.354	1363.6	7372	330.2	1849	490.2	274.4	525	564.2
2001	430000	431300	0.00173047	1	0.233184	2322.18	470.2	1363.6	7372	330.2	1849	490.2	274.4	525	564.2
2000	310000	310000	0	1	#N/A		#N/A	1163.2	6443	360.1	0	530.4	255.7	411	496.5
2000	320000	320100	0	1	0.21196	2156.8	356.721	1163.2	6443	360.1	0	530.4	255.7	411	496.5
2000	320000	320200	0	1	0.20692	2152	435.488	1163.2	6443	360.1	0	530.4	255.7	411	496.5
2000	320000	320300	0	1	0.20784	2270	352.972	1163.2	6443	360.1	0	530.4	255.7	411	496.5
2000	320000	320400	0	1	0.23116	2398	381.206	1163.2	6443	360.1	0	530.4	255.7	411	496.5
2000	320000	320500	0	1	0.22708	2303.6	325.367	1163.2	6443	360.1	0	530.4	255.7	411	496.5
2000	320000	320600	0	1	0.2244	2244.8	344.919	1163.2	6443	360.1	0	530.4	255.7	411	496.5
2000	320000	320700	0	1	0.21932	2340.4	380.709	1163.2	6443	360.1	0	530.4	255.7	411	496.5
2000	320000	320800	0	1	0.21884	2088	285.398	1163.2	6443	360.1	0	530.4	255.7	411	496.5
2000	320000	320900	0	1	0.23684	2289.2	385.383	1163.2	6443	360.1	0	530.4	255.7	411	496.5
2000	320000	321000	0	1	0.22572	2372.8	410.665	1163.2	6443	360.1	0	530.4	255.7	411	496.5
2000	320000	321100	0	1	0.22316	2322.4	461.312	1163.2	6443	360.1	0	530.4	255.7	411	496.5
2000	320000	321200	0	1	0.20752	2158	335.927	1163.2	6443	360.1	0	530.4	255.7	411	496.5
2000	320000	321300	0	1	0.201	2062.8	359.386	1163.2	6443	360.1	0	530.4	255.7	411	496.5
2000	330000	330100	0	1	0.23496	2038.4	370.155	1363.6	7372	330.2	1849	490.2	274.4	525	564.2
2000	330000	330200	0	1	0.2384	2058.8	322.231	1363.6	7372	330.2	1849	490.2	274.4	525	564.2
2000	330000	330300	0	1	0.20352	2154.4	364.14	1363.6	7372	330.2	1849	490.2	274.4	525	564.2
2000	330000	330400	0	1	0.2168	2238.8	319.806	1363.6	7372	330.2	1849	490.2	274.4	525	564.2
2000	330000	330500	0	1	0.232	2322	354.245	1363.6	7372	330.2	1849	490.2	274.4	525	564.2
2000	330000	330600	0	1	0.232	2075.6	375.297	1363.6	7372	330.2	1849	490.2	274.4	525	564.2
2000	330000	330700	0	1	0.216	2168.8	328.019	1363.6	7372	330.2	1849	490.2	274.4	525	564.2
2000	330000	330800	0	1	0.2282	2049.6	283.865	1363.6	7372	330.2	1849	490.2	274.4	525	564.2
2000	330000	330900	0	1	0.20564	2170.4	335.026	1363.6	7372	330.2	1849	490.2	274.4	525	564.2
2000	330000	331000	0	1	0.2156	2348.4	295.357	1363.6	7372	330.2	1849	490.2	274.4	525	564.2
2000	330000	331100	0	1	0.20372	2019.2	367.144	1363.6	7372	330.2	1849	490.2	274.4	525	564.2
2000	340000	340100	0	1	0.14076	1508.8	232.455	1163.2	6443	360.1	0	530.4	255.7	411	496.5
2000	340000	340181	0	1	#N/A	#N/A	#N/A	1163.2	6443	360.1	0	530.4	255.7	411	496.5
2000	340000	340200	0	1	0.15028	1304.8	222.512	1163.2	6443	360.1	0	530.4	255.7	411	496.5
2000	340000	340300	0	1	0.14652	1360.8	267.707	1163.2	6443	360.1	0	530.4	255.7	411	496.5
2000	340000	340400	0	1	0.12916	1317.6	223.528	1163.2	6443	360.1	0	530.4	255.7	411	496.5
2000	340000	340500	0	1	0.15012	1380.4	235.848	1163.2	6443	360.1	0	530.4	255.7	411	496.5
2000	340000	340600	0	1	0.13444	1475.2	190.583	1163.2	6443	360.1	0	530.4	255.7	411	496.5
2000	340000	340700	0	1	0.1258	1449.2	219.301	1163.2	6443	360.1	0	530.4	255.7	411	496.5
2000	340000	340800	0	1	0.12832	1533.2	204.059	1163.2	6443	360.1	0	530.4	255.7	411	496.5
2000	340000	341000	0	1	0.15948	1531.2	297.621	1163.2	6443	360.1	0	530.4	255.7	411	496.5
2000	340000	341100	0	1	0.13892	1594	300.899	1163.2	6443	360.1	0	530.4	255.7	411	496.5
2000	340000	341200	0	1	0.1294	1336	204.945	1163.2	6443	360.1	0	530.4	255.7	411	496.5
2000	340000	341300	0	1	0.12948	1581.2	267.652	1163.2	6443	360.1	0	530.4	255.7	411	496.5
2000	340000	341500	0	1	0.1298	1598.4	323.16	1163.2	6443	360.1	0	530.4	255.7	411	496.5
2000	340000	341600	0	1	0.15208	1470.8	267.247	1163.2	6443	360.1	0	530.4	255.7	411	496.5
2000	340000	341700	0	1	0.15916	1520.8	203.047	1163.2	6443	360.1	0	530.4	255.7	411	496.5
2000	340000	341800	0	1	0.13948	1584.8	278.023	1163.2	6443	360.1	0	530.4	255.7	411	496.5
2000	360000	360100	0	1	0.12436	1418	197.938	1163.2	6443	360.1	0	530.4	255.7	411	496.5
2000	360000	360200	0	1	0.13156	1300.4	182.853	1163.2	6443	360.1	0	530.4	255.7	411	496.5
2000	360000	360300	0	1	0.12112	1369.6	246.835	1163.2	6443	360.1	0	530.4	255.7	411	496.5
2000	360000	360400	0	1	0.14544	1548	256.986	1163.2	6443	360.1	0	530.4	255.7	411	496.5
2000	360000	360500	0	1	0.139	1239.6	205.15	1163.2	6443	360.1	0	530.4	255.7	411	496.5
2000	360000	360600	0	1	0.12444	1508.4	278.417	1163.2	6443	360.1	0	530.4	255.7	411	496.5
2000	360000	360700	0	1	0.14736	1312.4	187.214	1163.2	6443	360.1	0	530.4	255.7	411	496.5
2000	360000	360800	0	1	0.12968	1324	251.485	1163.2	6443	360.1	0	530.4	255.7	411	496.5
2000	360000	360900	0	1	0.12368	1506.4	284.192	1163.2	6443	360.1	0	530.4	255.7	411	496.5
2000	360000	361000	0	1	0.12808	1268.8	192.294	1163.2	6443	360.1	0	530.4	255.7	411	496.5
2000	360000	361100	0	1	0.12324	1364.8	196.484	1163.2	6443	360.1	0	530.4	255.7	411	496.5
2000	420000	420100	0	1	0.21884	2216.4	348.227	1163.2	6443	360.1	0	530.4	255.7	411	496.5
2000	420000	420200	0	1	0.20644	2148.4	298.593	1163.2	6443	360.1	0	530.4	255.7	411	496.5
2000	420000	420300	0	1	0.2348	2340	351.272	1163.2	6443	360.1	0	530.4	255.7	411	496.5
2000	420000	420500	0	1	0.22748	2339.2	395.513	1163.2	6443	360.1	0	530.4	255.7	411	496.5
2000	420000	420600	0	1	0.2368	2192.8	310.573	1163.2	6443	360.1	0	530.4	255.7	411	496.5
2000	420000	420700	0	1	0.22988	2049.2	261.801	1163.2	6443	360.1	0	530.4	255.7	411	496.5
2000	420000	420800	0	1	0.226	2145.6	303.806	1163.2	6443	360.1	0	530.4	255.7	411	496.5
2000	420000	420900	0	1	0.21788	2350	435.278	1163.2	6443	360.1	0	530.4	255.7	411	496.5
2000	420000	421000	0	1	0.20948	2016	311.937	1163.2	6443	360.1	0	530.4	255.7	411	496.5
2000	420000	421100	0	1	0.20804	2008.4	276.075	1163.2	6443	360.1	0	530.4	255.7	411	496.5
2000	420000	421200	0	1	0.2272	2068.8	346.613	1163.2	6443	360.1	0	530.4	255.7	411	496.5
2000	420000	421300	0	1	0.2128	2094.4	312.497	1163.2	6443	360.1	0	530.4	255.7	411	496.5
2000	430000	430100	0	1	0.22296	2295.2	387.727	1163.2	6443	360.1	0	530.4	255.7	411	496.5
2000	430000	430200	0	1	0.23128	2012.8	376.443	1163.2	6443	360.1	0	530.4	255.7	411	496.5
2000	430000	430300	0	1	0.22284	2055.2	329.82	1163.2	6443	360.1	0	530.4	255.7	411	496.5
2000	430000	430400	0	1	0.2268	2184.4	297.096	1163.2	6443	360.1	0	530.4	255.7	411	496.5
2000	430000	430500	0	1	0.20512	2365.6	391.461	1163.2	6443	360.1	0	530.4	255.7	411	496.5
2000	430000	430600	0	1	0.23556	2010.8	323.283	1163.2	6443	360.1	0	530.4	255.7	411	496.5
2000	430000	430700	0	1	0.21276	2369.2	429.474	1163.2	6443	360.1	0	530.4	255.7	411	496.5
2000	430000	430800	0	1	0.21736	2193.2	386.302	1163.2	6443	360.1	0	530.4	255.7	411	496.5
2000	430000	430900	0	1	0.20836	2321.2	309.105	1163.2	6443	360.1	0	530.4	255.7	411	496.5
2000	430000	431000	0	1	0.22576	2263.6	435.595	1163.2	6443	360.1	0	530.4	255.7	411	496.5
2000	430000	431100	0	1	0.20272	2200.4	378.994	1163.2	6443	360.1	0	530.4	255.7	411	496.5
2000	430000	431200	0	1	0.21736	2299.6	314.079	1163.2	6443	360.1	0	530.4	255.7	411	496.5
2000	430000	431300	0	1	0.22332	2089.6	289.818	1163.2	6443	360.1	0	530.4	255.7	411	496.5
